# Supplementary material for: Constitutive expression of REL1 confers the rice response to drought stress and abscisic acid
Source: Rice (N Y). 2018 Oct 25;11:59. doi: 10.1186/s12284-018-0251-0 (PMC6202306; doi:10.1186/s12284-018-0251-0)
Supplement: Supplementary file 13 — Table S8. GO enrichment (Biological Process) of the down-regulated DEGs in rel1-D. (XLSX 125 kb) [file 12284_2018_251_MOESM13_ESM.xlsx]

## Sheet: Supplemental Table S7
Supplemental Table 8. GO enrichment (Biological Process) of the down-regulated DEGs in rel1-D
GO ID	Description	GeneRatio (209)	BgRatio (20518)	p-value	FDR	Gene ID
GO:0044710	single-organism metabolic process	41	1261	2.91801e-11	2.30523e-09	LOC_Os06g37224;LOC_Os06g03900;LOC_Os07g17970;LOC_Os06g20790;LOC_Os07g18162;LOC_Os11g18194;LOC_Os02g36264;LOC_Os02g36220;LOC_Os11g30560;LOC_Os11g08569;LOC_Os06g47910;LOC_Os07g18158;LOC_Os12g30824;LOC_Os01g22640;LOC_Os02g36210;LOC_Os06g37300;LOC_Os06g15170;LOC_Os03g22634;LOC_Os02g37654;LOC_Os02g37700;LOC_Os05g04170;LOC_Os01g54620;LOC_Os08g04500;LOC_Os10g38540;LOC_Os11g35930;LOC_Os01g45200;LOC_Os04g…
GO:0019748	secondary metabolic process	20	396	4.63039e-09	1.829e-07	LOC_Os10g38540;LOC_Os07g18162;LOC_Os11g35930;LOC_Os01g45200;LOC_Os04g01470;LOC_Os06g43304;LOC_Os01g19970;LOC_Os02g46970;LOC_Os09g25610;LOC_Os09g26980;LOC_Os12g16240;LOC_Os04g08828;LOC_Os01g62480;LOC_Os03g32470;LOC_Os08g34280;LOC_Os10g16974;LOC_Os01g54620;LOC_Os03g62670;LOC_Os11g32650;LOC_Os08g06100
GO:0006629	lipid metabolic process	23	847	1.90466e-05	0.00050156	LOC_Os06g37224;LOC_Os06g03900;LOC_Os07g17970;LOC_Os06g20790;LOC_Os07g18162;LOC_Os11g18194;LOC_Os02g36264;LOC_Os02g36220;LOC_Os11g30560;LOC_Os11g08569;LOC_Os06g47910;LOC_Os07g18158;LOC_Os12g30824;LOC_Os01g22640;LOC_Os02g36210;LOC_Os06g37300;LOC_Os06g15170;LOC_Os03g22634;LOC_Os02g37654;LOC_Os02g37700;LOC_Os05g04170;LOC_Os01g54620;LOC_Os08g04500
GO:0008152	metabolic process	149	12079	0.000122518	0.00241974	LOC_Os05g46860;LOC_Os06g47560;LOC_Os01g65010;LOC_Os12g22110;LOC_Os10g08014;LOC_Os09g10840;LOC_Os01g66860;LOC_Os06g38160;LOC_Os07g18874;LOC_Os04g50770;LOC_Os01g19970;LOC_Os05g49240;LOC_Os06g06440;LOC_Os03g20780;LOC_Os05g04640;LOC_Os09g03939;LOC_Os11g37700;LOC_Os08g43120;LOC_Os01g22640;LOC_Os09g18230;LOC_Os01g63210;LOC_Os01g09550;LOC_Os12g22284;LOC_Os11g03230;LOC_Os01g43230;LOC_Os01g67580;LOC_Os10g…
GO:0009719	response to endogenous stimulus	26	1192	0.000206462	0.0032621	LOC_Os06g37224;LOC_Os12g07810;LOC_Os06g20790;LOC_Os11g35930;LOC_Os06g32600;LOC_Os02g36264;LOC_Os12g22110;LOC_Os10g08014;LOC_Os07g18874;LOC_Os04g50770;LOC_Os01g19970;LOC_Os02g36220;LOC_Os11g30560;LOC_Os09g26980;LOC_Os03g20780;LOC_Os07g44440;LOC_Os09g03939;LOC_Os12g30824;LOC_Os02g36210;LOC_Os06g37300;LOC_Os01g53294;LOC_Os12g22284;LOC_Os10g16974;LOC_Os11g32650;LOC_Os11g02400;LOC_Os12g02340
GO:0009607	response to biotic stimulus	21	915	0.000450198	0.00592761	LOC_Os01g45140;LOC_Os11g04150;LOC_Os06g43304;LOC_Os06g08830;LOC_Os07g35940;LOC_Os06g43350;LOC_Os07g13634;LOC_Os11g17970;LOC_Os03g20780;LOC_Os04g08828;LOC_Os07g18990;LOC_Os03g50960;LOC_Os04g46990;LOC_Os02g21009;LOC_Os12g29950;LOC_Os03g22634;LOC_Os01g67580;LOC_Os01g71810;LOC_Os01g54620;LOC_Os03g15050;LOC_Os08g04500
GO:0006810	transport	36	2122	0.00153156	0.0142784	LOC_Os10g02340;LOC_Os11g18110;LOC_Os06g47560;LOC_Os11g35930;LOC_Os01g12130;LOC_Os12g22110;LOC_Os10g08014;LOC_Os11g04150;LOC_Os07g18874;LOC_Os02g49060;LOC_Os01g66010;LOC_Os06g06440;LOC_Os11g19240;LOC_Os02g48570;LOC_Os11g17970;LOC_Os09g03939;LOC_Os10g05780;LOC_Os11g37700;LOC_Os08g43120;LOC_Os07g18990;LOC_Os06g15910;LOC_Os03g50960;LOC_Os04g38220;LOC_Os10g36170;LOC_Os03g37470;LOC_Os05g18294;LOC_Os02g…
GO:0051234	establishment of localization	36	2128	0.00160856	0.0142784	LOC_Os10g02340;LOC_Os11g18110;LOC_Os06g47560;LOC_Os11g35930;LOC_Os01g12130;LOC_Os12g22110;LOC_Os10g08014;LOC_Os11g04150;LOC_Os07g18874;LOC_Os02g49060;LOC_Os01g66010;LOC_Os06g06440;LOC_Os11g19240;LOC_Os02g48570;LOC_Os11g17970;LOC_Os09g03939;LOC_Os10g05780;LOC_Os11g37700;LOC_Os08g43120;LOC_Os07g18990;LOC_Os06g15910;LOC_Os03g50960;LOC_Os04g38220;LOC_Os10g36170;LOC_Os03g37470;LOC_Os05g18294;LOC_Os02g…
GO:0051179	localization	36	2132	0.00166176	0.0142784	LOC_Os10g02340;LOC_Os11g18110;LOC_Os06g47560;LOC_Os11g35930;LOC_Os01g12130;LOC_Os12g22110;LOC_Os10g08014;LOC_Os11g04150;LOC_Os07g18874;LOC_Os02g49060;LOC_Os01g66010;LOC_Os06g06440;LOC_Os11g19240;LOC_Os02g48570;LOC_Os11g17970;LOC_Os09g03939;LOC_Os10g05780;LOC_Os11g37700;LOC_Os08g43120;LOC_Os07g18990;LOC_Os06g15910;LOC_Os03g50960;LOC_Os04g38220;LOC_Os10g36170;LOC_Os03g37470;LOC_Os05g18294;LOC_Os02g…
GO:0050896	response to stimulus	68	4827	0.00180739	0.0142784	LOC_Os01g45140;LOC_Os11g04150;LOC_Os06g43304;LOC_Os06g08830;LOC_Os07g35940;LOC_Os06g43350;LOC_Os07g13634;LOC_Os11g17970;LOC_Os03g20780;LOC_Os04g08828;LOC_Os07g18990;LOC_Os03g50960;LOC_Os04g46990;LOC_Os02g21009;LOC_Os12g29950;LOC_Os03g22634;LOC_Os01g67580;LOC_Os01g71810;LOC_Os01g54620;LOC_Os03g15050;LOC_Os08g04500;LOC_Os06g37224;LOC_Os06g20790;LOC_Os06g32600;LOC_Os02g36264;LOC_Os09g10840;LOC_Os02g…
GO:0009628	response to abiotic stimulus	29	1808	0.00968702	0.0695704	LOC_Os01g44069;LOC_Os01g04380;LOC_Os02g14680;LOC_Os06g47560;LOC_Os12g07810;LOC_Os11g35930;LOC_Os12g22110;LOC_Os10g08014;LOC_Os07g18874;LOC_Os02g46970;LOC_Os09g26980;LOC_Os07g44440;LOC_Os09g03939;LOC_Os08g36500;LOC_Os08g34280;LOC_Os01g63210;LOC_Os06g15170;LOC_Os12g22284;LOC_Os01g71810;LOC_Os10g16974;LOC_Os01g54620;LOC_Os12g02370;LOC_Os05g41460;LOC_Os11g41710;LOC_Os07g31720;LOC_Os11g32650;LOC_Os06g…
GO:0044699	single-organism process	61	4919	0.0474741	0.312538	LOC_Os06g37224;LOC_Os06g20790;LOC_Os06g32600;LOC_Os02g36264;LOC_Os09g10840;LOC_Os02g36220;LOC_Os03g20780;LOC_Os12g30824;LOC_Os07g18990;LOC_Os02g36210;LOC_Os06g37300;LOC_Os01g63210;LOC_Os01g53294;LOC_Os04g41680;LOC_Os02g06480;LOC_Os01g44069;LOC_Os11g18194;LOC_Os02g46970;LOC_Os11g08569;LOC_Os07g44440;LOC_Os03g32470;LOC_Os06g15170;LOC_Os01g09550;LOC_Os04g35280;LOC_Os06g03900;LOC_Os07g17970;LOC_Os07g…
GO:0009056	catabolic process	19	1281	0.0643935	0.373565	LOC_Os02g14680;LOC_Os06g47560;LOC_Os10g38540;LOC_Os12g22110;LOC_Os10g08014;LOC_Os07g18874;LOC_Os06g06440;LOC_Os07g35940;LOC_Os10g37660;LOC_Os09g03939;LOC_Os11g37700;LOC_Os08g43120;LOC_Os04g08828;LOC_Os12g22284;LOC_Os11g03230;LOC_Os01g67580;LOC_Os03g62670;LOC_Os12g02980;LOC_Os06g47550
GO:0019725	cellular homeostasis	5	212	0.0662015	0.373565	LOC_Os06g47560;LOC_Os02g21009;LOC_Os09g31130;LOC_Os12g38270;LOC_Os06g47550
GO:0042592	homeostatic process	5	220	0.0749316	0.392633	LOC_Os06g47560;LOC_Os02g21009;LOC_Os09g31130;LOC_Os12g38270;LOC_Os06g47550
GO:0065008	regulation of biological quality	5	224	0.0795206	0.392633	LOC_Os06g47560;LOC_Os02g21009;LOC_Os09g31130;LOC_Os12g38270;LOC_Os06g47550
GO:0006950	response to stress	36	2953	0.142042	0.66008	LOC_Os01g04380;LOC_Os01g56380;LOC_Os02g14680;LOC_Os12g07810;LOC_Os06g20790;LOC_Os11g35930;LOC_Os06g32600;LOC_Os08g28790;LOC_Os12g22110;LOC_Os10g08014;LOC_Os07g18874;LOC_Os06g43304;LOC_Os04g41680;LOC_Os07g13634;LOC_Os03g20780;LOC_Os07g44440;LOC_Os09g03939;LOC_Os04g08828;LOC_Os07g18990;LOC_Os03g50960;LOC_Os02g16270;LOC_Os08g34280;LOC_Os12g29950;LOC_Os06g15170;LOC_Os01g53294;LOC_Os03g03810;LOC_Os12g…
GO:0065007	biological regulation	19	1636	0.309128	1	LOC_Os06g37224;LOC_Os06g20790;LOC_Os06g32600;LOC_Os02g36264;LOC_Os09g10840;LOC_Os02g36220;LOC_Os03g20780;LOC_Os12g30824;LOC_Os07g18990;LOC_Os02g36210;LOC_Os06g37300;LOC_Os01g63210;LOC_Os01g53294;LOC_Os05g46860;LOC_Os06g47560;LOC_Os02g21009;LOC_Os09g31130;LOC_Os12g38270;LOC_Os06g47550
GO:0009856	pollination	3	228	0.410803	1	LOC_Os01g65010;LOC_Os11g03230;LOC_Os12g02980
GO:0044703	multi-organism reproductive process	3	228	0.410803	1	LOC_Os01g65010;LOC_Os11g03230;LOC_Os12g02980
GO:0044706	multi-multicellular organism process	3	228	0.410803	1	LOC_Os01g65010;LOC_Os11g03230;LOC_Os12g02980
GO:0051704	multi-organism process	3	234	0.427069	1	LOC_Os01g65010;LOC_Os11g03230;LOC_Os12g02980
GO:0009058	biosynthetic process	47	4526	0.467377	1	LOC_Os06g37224;LOC_Os07g17970;LOC_Os06g20790;LOC_Os07g18162;LOC_Os11g18194;LOC_Os11g35930;LOC_Os01g45200;LOC_Os02g36264;LOC_Os04g01470;LOC_Os09g10840;LOC_Os06g43304;LOC_Os03g12110;LOC_Os04g50770;LOC_Os01g19970;LOC_Os02g36220;LOC_Os05g49240;LOC_Os09g26980;LOC_Os11g08569;LOC_Os03g20780;LOC_Os12g16240;LOC_Os05g04640;LOC_Os07g18158;LOC_Os07g15970;LOC_Os12g30824;LOC_Os04g08828;LOC_Os01g22640;LOC_Os08g…
GO:0005975	carbohydrate metabolic process	9	846	0.495177	1	LOC_Os07g18162;LOC_Os07g35940;LOC_Os09g25610;LOC_Os10g37660;LOC_Os01g22640;LOC_Os04g45290;LOC_Os01g54620;LOC_Os03g62670;LOC_Os03g15050
GO:0009606	tropism	1	69	0.507189	1	LOC_Os07g31720
GO:0007165	signal transduction	13	1256	0.517296	1	LOC_Os06g37224;LOC_Os06g20790;LOC_Os06g32600;LOC_Os02g36264;LOC_Os09g10840;LOC_Os02g36220;LOC_Os03g20780;LOC_Os12g30824;LOC_Os07g18990;LOC_Os02g36210;LOC_Os06g37300;LOC_Os01g63210;LOC_Os01g53294
GO:0023052	signaling	13	1272	0.536054	1	LOC_Os06g37224;LOC_Os06g20790;LOC_Os06g32600;LOC_Os02g36264;LOC_Os09g10840;LOC_Os02g36220;LOC_Os03g20780;LOC_Os12g30824;LOC_Os07g18990;LOC_Os02g36210;LOC_Os06g37300;LOC_Os01g63210;LOC_Os01g53294
GO:0044700	single organism signaling	13	1272	0.536054	1	LOC_Os06g37224;LOC_Os06g20790;LOC_Os06g32600;LOC_Os02g36264;LOC_Os09g10840;LOC_Os02g36220;LOC_Os03g20780;LOC_Os12g30824;LOC_Os07g18990;LOC_Os02g36210;LOC_Os06g37300;LOC_Os01g63210;LOC_Os01g53294
GO:0051716	cellular response to stimulus	13	1273	0.537219	1	LOC_Os06g37224;LOC_Os06g20790;LOC_Os06g32600;LOC_Os02g36264;LOC_Os09g10840;LOC_Os02g36220;LOC_Os03g20780;LOC_Os12g30824;LOC_Os07g18990;LOC_Os02g36210;LOC_Os06g37300;LOC_Os01g63210;LOC_Os01g53294
GO:0050794	regulation of cellular process	13	1304	0.572857	1	LOC_Os06g37224;LOC_Os06g20790;LOC_Os06g32600;LOC_Os02g36264;LOC_Os09g10840;LOC_Os02g36220;LOC_Os03g20780;LOC_Os12g30824;LOC_Os07g18990;LOC_Os02g36210;LOC_Os06g37300;LOC_Os01g63210;LOC_Os01g53294
GO:0007154	cell communication	15	1528	0.597651	1	LOC_Os06g37224;LOC_Os06g20790;LOC_Os06g32600;LOC_Os02g36264;LOC_Os09g10840;LOC_Os02g36220;LOC_Os03g20780;LOC_Os12g30824;LOC_Os07g18990;LOC_Os02g36210;LOC_Os06g37300;LOC_Os01g63210;LOC_Os01g53294;LOC_Os01g65010;LOC_Os03g15050
GO:0008219	cell death	3	305	0.60331	1	LOC_Os04g41680;LOC_Os01g53294;LOC_Os12g02340
GO:0016265	death	3	305	0.60331	1	LOC_Os04g41680;LOC_Os01g53294;LOC_Os12g02340
GO:0009875	pollen-pistil interaction	1	91	0.606925	1	LOC_Os01g65010
GO:0050789	regulation of biological process	14	1448	0.619695	1	LOC_Os06g37224;LOC_Os06g20790;LOC_Os06g32600;LOC_Os02g36264;LOC_Os09g10840;LOC_Os02g36220;LOC_Os03g20780;LOC_Os12g30824;LOC_Os07g18990;LOC_Os02g36210;LOC_Os06g37300;LOC_Os01g63210;LOC_Os01g53294;LOC_Os05g46860
GO:0040029	regulation of gene expression, epigenetic	1	124	0.720123	1	LOC_Os05g46860
GO:0010468	regulation of gene expression	1	161	0.808885	1	LOC_Os05g46860
GO:0060255	regulation of macromolecule metabolic process	1	161	0.808885	1	LOC_Os05g46860
GO:0019222	regulation of metabolic process	1	166	0.818497	1	LOC_Os05g46860
GO:0044763	single-organism cellular process	24	2770	0.831011	1	LOC_Os01g44069;LOC_Os06g37224;LOC_Os06g20790;LOC_Os06g32600;LOC_Os02g36264;LOC_Os09g10840;LOC_Os02g36220;LOC_Os03g20780;LOC_Os12g30824;LOC_Os07g18990;LOC_Os02g36210;LOC_Os06g37300;LOC_Os01g63210;LOC_Os01g53294;LOC_Os01g65010;LOC_Os03g15050;LOC_Os06g47560;LOC_Os02g21009;LOC_Os09g31130;LOC_Os12g38270;LOC_Os06g47550;LOC_Os04g41680;LOC_Os06g15170;LOC_Os12g02340
GO:0009991	response to extracellular stimulus	1	200	0.872256	1	LOC_Os03g15050
GO:0009987	cellular process	109	11480	0.88115	1	LOC_Os05g46860;LOC_Os06g47560;LOC_Os01g65010;LOC_Os12g22110;LOC_Os10g08014;LOC_Os09g10840;LOC_Os01g66860;LOC_Os06g38160;LOC_Os07g18874;LOC_Os04g50770;LOC_Os01g19970;LOC_Os05g49240;LOC_Os06g06440;LOC_Os03g20780;LOC_Os05g04640;LOC_Os09g03939;LOC_Os11g37700;LOC_Os08g43120;LOC_Os01g22640;LOC_Os09g18230;LOC_Os01g63210;LOC_Os01g09550;LOC_Os12g22284;LOC_Os11g03230;LOC_Os01g43230;LOC_Os01g67580;LOC_Os10g…
GO:0009605	response to external stimulus	2	366	0.889771	1	LOC_Os07g31720;LOC_Os03g15050
GO:0040007	growth	2	460	0.95012	1	LOC_Os05g46860;LOC_Os06g15170
GO:0006091	generation of precursor metabolites and energy	1	300	0.954691	1	LOC_Os01g22640
GO:0016043	cellular component organization	8	1317	0.962042	1	LOC_Os04g43290;LOC_Os05g06110;LOC_Os11g18194;LOC_Os02g46970;LOC_Os11g08569;LOC_Os02g06480;LOC_Os06g15170;LOC_Os12g02340
GO:0071840	cellular component organization or biogenesis	8	1318	0.962262	1	LOC_Os04g43290;LOC_Os05g06110;LOC_Os11g18194;LOC_Os02g46970;LOC_Os11g08569;LOC_Os02g06480;LOC_Os06g15170;LOC_Os12g02340
GO:0022414	reproductive process	3	654	0.964573	1	LOC_Os01g65010;LOC_Os11g03230;LOC_Os12g02980
GO:0009790	embryo development	2	501	0.965091	1	LOC_Os04g41680;LOC_Os02g06480
GO:0016049	cell growth	1	362	0.976233	1	LOC_Os06g15170
GO:0032501	multicellular organismal process	14	2263	0.987626	1	LOC_Os04g41680;LOC_Os02g06480;LOC_Os01g44069;LOC_Os11g18194;LOC_Os02g46970;LOC_Os11g08569;LOC_Os07g44440;LOC_Os03g32470;LOC_Os06g15170;LOC_Os01g09550;LOC_Os04g35280;LOC_Os01g65010;LOC_Os11g03230;LOC_Os12g02980
GO:0030154	cell differentiation	1	441	0.989585	1	LOC_Os01g44069
GO:0048869	cellular developmental process	1	442	0.989693	1	LOC_Os01g44069
GO:0006139	nucleobase-containing compound metabolic process	23	3371	0.989821	1	LOC_Os05g46860;LOC_Os06g47560;LOC_Os12g22110;LOC_Os10g08014;LOC_Os09g10840;LOC_Os07g18874;LOC_Os04g50770;LOC_Os01g19970;LOC_Os05g49240;LOC_Os06g06440;LOC_Os03g20780;LOC_Os05g04640;LOC_Os09g03939;LOC_Os11g37700;LOC_Os08g43120;LOC_Os01g09550;LOC_Os12g22284;LOC_Os11g03230;LOC_Os01g43230;LOC_Os01g67580;LOC_Os10g18150;LOC_Os12g02980;LOC_Os06g47550
GO:0046483	heterocycle metabolic process	23	3373	0.989919	1	LOC_Os05g46860;LOC_Os06g47560;LOC_Os12g22110;LOC_Os10g08014;LOC_Os09g10840;LOC_Os07g18874;LOC_Os04g50770;LOC_Os01g19970;LOC_Os05g49240;LOC_Os06g06440;LOC_Os03g20780;LOC_Os05g04640;LOC_Os09g03939;LOC_Os11g37700;LOC_Os08g43120;LOC_Os01g09550;LOC_Os12g22284;LOC_Os11g03230;LOC_Os01g43230;LOC_Os01g67580;LOC_Os10g18150;LOC_Os12g02980;LOC_Os06g47550
GO:0006725	cellular aromatic compound metabolic process	23	3375	0.990016	1	LOC_Os05g46860;LOC_Os06g47560;LOC_Os12g22110;LOC_Os10g08014;LOC_Os09g10840;LOC_Os07g18874;LOC_Os04g50770;LOC_Os01g19970;LOC_Os05g49240;LOC_Os06g06440;LOC_Os03g20780;LOC_Os05g04640;LOC_Os09g03939;LOC_Os11g37700;LOC_Os08g43120;LOC_Os01g09550;LOC_Os12g22284;LOC_Os11g03230;LOC_Os01g43230;LOC_Os01g67580;LOC_Os10g18150;LOC_Os12g02980;LOC_Os06g47550
GO:1901360	organic cyclic compound metabolic process	23	3377	0.990112	1	LOC_Os05g46860;LOC_Os06g47560;LOC_Os12g22110;LOC_Os10g08014;LOC_Os09g10840;LOC_Os07g18874;LOC_Os04g50770;LOC_Os01g19970;LOC_Os05g49240;LOC_Os06g06440;LOC_Os03g20780;LOC_Os05g04640;LOC_Os09g03939;LOC_Os11g37700;LOC_Os08g43120;LOC_Os01g09550;LOC_Os12g22284;LOC_Os11g03230;LOC_Os01g43230;LOC_Os01g67580;LOC_Os10g18150;LOC_Os12g02980;LOC_Os06g47550
GO:0000003	reproduction	6	1270	0.9908	1	LOC_Os01g65010;LOC_Os11g03230;LOC_Os12g02980;LOC_Os01g44069;LOC_Os04g41680;LOC_Os07g44440
GO:0008150	biological_process	54	6904	0.994201	1	LOC_Os05g45370;LOC_Os11g25040;LOC_Os12g02880;LOC_Os02g35530;LOC_Os05g46860;LOC_Os02g14680;LOC_Os06g47560;LOC_Os01g06150;LOC_Os10g21670;LOC_Os03g13050;LOC_Os06g39390;LOC_Os03g09120;LOC_Os03g02040;LOC_Os09g27260;LOC_Os01g12130;LOC_Os04g02580;LOC_Os01g56370;LOC_Os09g31350;LOC_Os02g06290;LOC_Os10g40620;LOC_Os07g15940;LOC_Os07g03890;LOC_Os04g50770;LOC_Os07g18240;LOC_Os06g49660;LOC_Os04g27060;LOC_Os01g…
GO:0044702	single organism reproductive process	1	501	0.994446	1	LOC_Os01g65010
GO:0009653	anatomical structure morphogenesis	2	729	0.995606	1	LOC_Os02g46970;LOC_Os06g15170
GO:0007275	multicellular organism development	11	2168	0.997827	1	LOC_Os04g41680;LOC_Os02g06480;LOC_Os01g44069;LOC_Os11g18194;LOC_Os02g46970;LOC_Os11g08569;LOC_Os07g44440;LOC_Os03g32470;LOC_Os06g15170;LOC_Os01g09550;LOC_Os04g35280
GO:0044707	single-multicellular organism process	11	2169	0.997841	1	LOC_Os04g41680;LOC_Os02g06480;LOC_Os01g44069;LOC_Os11g18194;LOC_Os02g46970;LOC_Os11g08569;LOC_Os07g44440;LOC_Os03g32470;LOC_Os06g15170;LOC_Os01g09550;LOC_Os04g35280
GO:0044767	single-organism developmental process	11	2198	0.998219	1	LOC_Os04g41680;LOC_Os02g06480;LOC_Os01g44069;LOC_Os11g18194;LOC_Os02g46970;LOC_Os11g08569;LOC_Os07g44440;LOC_Os03g32470;LOC_Os06g15170;LOC_Os01g09550;LOC_Os04g35280
GO:0034641	cellular nitrogen compound metabolic process	23	3838	0.999153	1	LOC_Os05g46860;LOC_Os06g47560;LOC_Os12g22110;LOC_Os10g08014;LOC_Os09g10840;LOC_Os07g18874;LOC_Os04g50770;LOC_Os01g19970;LOC_Os05g49240;LOC_Os06g06440;LOC_Os03g20780;LOC_Os05g04640;LOC_Os09g03939;LOC_Os11g37700;LOC_Os08g43120;LOC_Os01g09550;LOC_Os12g22284;LOC_Os11g03230;LOC_Os01g43230;LOC_Os01g67580;LOC_Os10g18150;LOC_Os12g02980;LOC_Os06g47550
GO:0006807	nitrogen compound metabolic process	23	3847	0.999196	1	LOC_Os05g46860;LOC_Os06g47560;LOC_Os12g22110;LOC_Os10g08014;LOC_Os09g10840;LOC_Os07g18874;LOC_Os04g50770;LOC_Os01g19970;LOC_Os05g49240;LOC_Os06g06440;LOC_Os03g20780;LOC_Os05g04640;LOC_Os09g03939;LOC_Os11g37700;LOC_Os08g43120;LOC_Os01g09550;LOC_Os12g22284;LOC_Os11g03230;LOC_Os01g43230;LOC_Os01g67580;LOC_Os10g18150;LOC_Os12g02980;LOC_Os06g47550
GO:0032502	developmental process	11	2319	0.999218	1	LOC_Os04g41680;LOC_Os02g06480;LOC_Os02g46970;LOC_Os06g15170;LOC_Os01g44069;LOC_Os11g18194;LOC_Os11g08569;LOC_Os07g44440;LOC_Os03g32470;LOC_Os01g09550;LOC_Os04g35280
GO:0044238	primary metabolic process	62	8244	0.99941	1	LOC_Os07g18162;LOC_Os07g35940;LOC_Os09g25610;LOC_Os10g37660;LOC_Os01g22640;LOC_Os04g45290;LOC_Os01g54620;LOC_Os03g62670;LOC_Os03g15050;LOC_Os05g46860;LOC_Os06g47560;LOC_Os12g22110;LOC_Os10g08014;LOC_Os09g10840;LOC_Os07g18874;LOC_Os04g50770;LOC_Os01g19970;LOC_Os05g49240;LOC_Os06g06440;LOC_Os03g20780;LOC_Os05g04640;LOC_Os09g03939;LOC_Os11g37700;LOC_Os08g43120;LOC_Os01g09550;LOC_Os12g22284;LOC_Os11g…
GO:0071704	organic substance metabolic process	62	8264	0.999466	1	LOC_Os07g18162;LOC_Os07g35940;LOC_Os09g25610;LOC_Os10g37660;LOC_Os01g22640;LOC_Os04g45290;LOC_Os01g54620;LOC_Os03g62670;LOC_Os03g15050;LOC_Os05g46860;LOC_Os06g47560;LOC_Os12g22110;LOC_Os10g08014;LOC_Os09g10840;LOC_Os07g18874;LOC_Os04g50770;LOC_Os01g19970;LOC_Os05g49240;LOC_Os06g06440;LOC_Os03g20780;LOC_Os05g04640;LOC_Os09g03939;LOC_Os11g37700;LOC_Os08g43120;LOC_Os01g09550;LOC_Os12g22284;LOC_Os11g…
GO:0048856	anatomical structure development	4	1426	0.99979	1	LOC_Os04g41680;LOC_Os02g06480;LOC_Os02g46970;LOC_Os06g15170
GO:0009791	post-embryonic development	2	1248	0.999972	1	LOC_Os04g41680;LOC_Os07g44440
GO:0006464	cellular protein modification process	6	2532	1	1	LOC_Os01g65010;LOC_Os09g10840;LOC_Os01g66860;LOC_Os06g38160;LOC_Os09g18230;LOC_Os01g63210
GO:0036211	protein modification process	6	2532	1	1	LOC_Os01g65010;LOC_Os09g10840;LOC_Os01g66860;LOC_Os06g38160;LOC_Os09g18230;LOC_Os01g63210
GO:0043412	macromolecule modification	6	2538	1	1	LOC_Os01g65010;LOC_Os09g10840;LOC_Os01g66860;LOC_Os06g38160;LOC_Os09g18230;LOC_Os01g63210
GO:0019538	protein metabolic process	11	3882	1	1	LOC_Os01g65010;LOC_Os09g10840;LOC_Os01g66860;LOC_Os06g38160;LOC_Os09g18230;LOC_Os01g63210;LOC_Os03g52070;LOC_Os04g57880;LOC_Os03g41438;LOC_Os06g15760;LOC_Os04g47360
GO:0044267	cellular protein metabolic process	6	3133	1	1	LOC_Os01g65010;LOC_Os09g10840;LOC_Os01g66860;LOC_Os06g38160;LOC_Os09g18230;LOC_Os01g63210
GO:0044237	cellular metabolic process	29	6556	1	1	LOC_Os05g46860;LOC_Os06g47560;LOC_Os01g65010;LOC_Os12g22110;LOC_Os10g08014;LOC_Os09g10840;LOC_Os01g66860;LOC_Os06g38160;LOC_Os07g18874;LOC_Os04g50770;LOC_Os01g19970;LOC_Os05g49240;LOC_Os06g06440;LOC_Os03g20780;LOC_Os05g04640;LOC_Os09g03939;LOC_Os11g37700;LOC_Os08g43120;LOC_Os01g22640;LOC_Os09g18230;LOC_Os01g63210;LOC_Os01g09550;LOC_Os12g22284;LOC_Os11g03230;LOC_Os01g43230;LOC_Os01g67580;LOC_Os10g…
GO:0043170	macromolecule metabolic process	11	4291	1	1	LOC_Os01g65010;LOC_Os09g10840;LOC_Os01g66860;LOC_Os06g38160;LOC_Os09g18230;LOC_Os01g63210;LOC_Os03g52070;LOC_Os04g57880;LOC_Os03g41438;LOC_Os06g15760;LOC_Os04g47360
GO:0044260	cellular macromolecule metabolic process	6	3540	1	1	LOC_Os01g65010;LOC_Os09g10840;LOC_Os01g66860;LOC_Os06g38160;LOC_Os09g18230;LOC_Os01g63210

## Sheet: Sheet1
Supplemental Table 2. Differentially expressed genes in rel1-D mutant
Gene ID	WT_count	rel1_count	WT_FPKM	rel1_FPKM	log2(FC)	Pvalue	FDR	significant	Symbol	Description	KEGG_A_class	KEGG_B_class	Pathway	K_ID	GO Component	GO Function	GO Process
LOC_Os01g01520	37	78.6667	3.66333	8.85	1.27252	5.30693e-05	0.00555403	yes	LOC_Os01g01520	transferase family protein, putative, expressed	-	-	-	-	-	GO:0003824//catalytic activity;GO:0016740//transferase activity	GO:0008150//biological_process;GO:0008152//metabolic process
LOC_Os01g01650	215.667	27.6667	27.72	4.09333	-2.75958	3.11099e-14	3.15718e-11	yes	LOC_Os01g01650	isoflavone reductase homolog IRL, putative, expressed	-	-	-	-	GO:0005575//cellular_component	GO:0003824//catalytic activity	GO:0008152//metabolic process
LOC_Os01g02870	353.667	594	40.02	80.54	1.00898	2.19805e-06	0.000408959	yes	LOC_Os01g02870	auxin-induced protein 5NG4, putative, expressed	-	-	-	-	GO:0005623//cell;GO:0016020//membrane	GO:0003674//molecular_function	-
LOC_Os01g04380	9.45	1.09333	2.08667	0.24	-3.12009	0.000689701	0.0411395	yes	LOC_Os01g04380	hsp20/alpha crystallin family protein, putative, expressed	Genetic Information Processing	Folding, sorting and degradation	ko04141//Protein processing in endoplasmic reticulum	K13993	-	-	GO:0006950//response to stress;GO:0009628//response to abiotic stimulus;GO:0050896//response to stimulus
LOC_Os01g04540	50.3433	154.807	4.12667	13.8567	1.74753	5.09436e-05	0.00538202	yes	LOC_Os01g04540	serine/threonine-protein kinase At1g18390 precursor, putative, expressed	-	-	-	-	GO:0016020//membrane;GO:0071944//cell periphery;GO:0005623//cell;GO:0005886//plasma membrane;GO:0044464//cell part	GO:1901265//nucleoside phosphate binding;GO:0016301//kinase activity;GO:0016740//transferase activity;GO:0003824//catalytic activity;GO:0036094//small molecule binding;GO:0016772//transferase activity, transferring phosphorus-containing groups;GO:0005488//binding;GO:0000166//nucleotide binding;GO:1901363//heterocyclic compound binding;GO:0097159//organic cyclic compound binding	GO:0009987//cellular process;GO:0008152//metabolic process;GO:0019538//protein metabolic process;GO:0043170//macromolecule metabolic process;GO:0044260//cellular macromolecule metabolic process;GO:0044267//cellular protein metabolic process;GO:0044238//primary metabolic process;GO:0071704//organic substance metabolic process;GO:0043412//macromolecule modification;GO:0036211//protein modification …
LOC_Os01g04550	18.81	66.96	2.08333	7.73667	1.89282	0.000285838	0.0205423	yes	LOC_Os01g04550	expressed protein	-	-	-	-	-	GO:0016772//transferase activity, transferring phosphorus-containing groups;GO:0003824//catalytic activity;GO:0016787//hydrolase activity;GO:0016740//transferase activity;GO:0016301//kinase activity	GO:0005975//carbohydrate metabolic process;GO:0071704//organic substance metabolic process;GO:0008152//metabolic process;GO:0006950//response to stress;GO:0009987//cellular process;GO:0050896//response to stimulus;GO:0044238//primary metabolic process
LOC_Os01g06150	16.6667	2.33333	2.97	0.486667	-2.60946	0.000131515	0.0111505	yes	LOC_Os01g06150	expressed protein	-	-	-	-	GO:0005575//cellular_component	GO:0003674//molecular_function	GO:0008150//biological_process
LOC_Os01g09220	966.333	1690.67	92.2667	185.903	1.01067	2.76988e-07	6.97976e-05	yes	LOC_Os01g09220	transposon protein, putative, CACTA, En/Spm sub-class, expressed	-	-	-	-	-	-	-
LOC_Os01g09550	137.31	39.27	8.74667	3.04333	-1.52308	5.66841e-09	2.18503e-06	yes	LOC_Os01g09550	no apical meristem protein, putative, expressed	-	-	-	-	-	GO:0003700//transcription factor activity, sequence-specific DNA binding;GO:0001071//nucleic acid binding transcription factor activity	GO:0006725//cellular aromatic compound metabolic process;GO:0034641//cellular nitrogen compound metabolic process;GO:0009058//biosynthetic process;GO:0044699//single-organism process;GO:0046483//heterocycle metabolic process;GO:0071704//organic substance metabolic process;GO:0007275//multicellular organism development;GO:0044767//single-organism developmental process;GO:1901360//organic cyclic co…
LOC_Os01g10504	1	9	0.153333	1.49	3.28057	0.000200284	0.0158196	yes	LOC_Os01g10504	OsMADS3 - MADS-box family gene with MIKCc type-box, expressed	-	-	-	-	GO:0044464//cell part;GO:0044424//intracellular part;GO:0005623//cell;GO:0043231//intracellular membrane-bounded organelle;GO:0043227//membrane-bounded organelle;GO:0043229//intracellular organelle;GO:0043226//organelle;GO:0005634//nucleus;GO:0005622//intracellular	GO:0001071//nucleic acid binding transcription factor activity;GO:0003676//nucleic acid binding;GO:0005488//binding;GO:0003677//DNA binding;GO:0003700//transcription factor activity, sequence-specific DNA binding;GO:0005515//protein binding;GO:0097159//organic cyclic compound binding;GO:1901363//heterocyclic compound binding	GO:0044763//single-organism cellular process;GO:0022414//reproductive process;GO:0000003//reproduction;GO:0032501//multicellular organismal process;GO:0032502//developmental process;GO:0006807//nitrogen compound metabolic process;GO:0007275//multicellular organism development;GO:0048731//system development;GO:0034641//cellular nitrogen compound metabolic process;GO:0048608//reproductive structure…
LOC_Os01g12130	24	5.33333	5.25333	1.36667	-1.94257	8.11224e-05	0.00776225	yes	LOC_Os01g12130	nodulin MtN3 family protein, putative, expressed	-	-	-	-	GO:0005886//plasma membrane;GO:0005623//cell;GO:0044464//cell part;GO:0071944//cell periphery;GO:0016020//membrane	GO:0005215//transporter activity	GO:0051179//localization;GO:0009987//cellular process;GO:0008150//biological_process;GO:0006810//transport;GO:0051234//establishment of localization
LOC_Os01g12750	91	37.6667	8.56333	3.95667	-1.11389	0.000246929	0.0181751	yes	LOC_Os01g12750	cytochrome P450, putative, expressed	-	-	-	-	-	GO:0005488//binding;GO:0003674//molecular_function;GO:0003824//catalytic activity;GO:0019825//oxygen binding	GO:0008152//metabolic process
LOC_Os01g13610	15	0.666667	2.22	0.09	-4.62449	7.67305e-05	0.00753373	yes	LOC_Os01g13610	isoflavone reductase homolog IRL, putative, expressed	-	-	-	-	GO:0005575//cellular_component	GO:0003824//catalytic activity	GO:0008152//metabolic process
LOC_Os01g15740	0.333333	11	0.06	1.90667	4.98995	3.70588e-06	0.000617462	yes	LOC_Os01g15740	expressed protein	-	-	-	-	-	-	-
LOC_Os01g18050	100.147	213.343	6.06	14.6433	1.27285	2.51458e-08	8.5064e-06	yes	LOC_Os01g18050	tubulin/FtsZ domain containing protein, putative, expressed	Cellular Processes	Transport and catabolism	ko04145//Phagosome	K07375	GO:0044424//intracellular part;GO:0005886//plasma membrane;GO:0016020//membrane;GO:0043226//organelle;GO:0071944//cell periphery;GO:0043229//intracellular organelle;GO:0005622//intracellular;GO:0005623//cell;GO:0044464//cell part;GO:0005856//cytoskeleton;GO:0043232//intracellular non-membrane-bounded organelle;GO:0043228//non-membrane-bounded organelle	GO:0005198//structural molecule activity	GO:0050896//response to stimulus;GO:0009628//response to abiotic stimulus;GO:0009987//cellular process;GO:0006950//response to stress
LOC_Os01g19020	561	240.333	68.3467	33.8967	-1.01173	1.36013e-06	0.000271135	yes	LOC_Os01g19020	peroxidase precursor, putative, expressed	-	-	-	-	-	GO:0003824//catalytic activity;GO:0005488//binding	GO:0006950//response to stress;GO:0050896//response to stimulus;GO:0008152//metabolic process
LOC_Os01g19970	37.3333	7.66667	4.93667	1.21333	-2.02456	7.70858e-05	0.00753373	yes	LOC_Os01g19970	MYB family transcription factor, putative, expressed	-	-	-	-	-	GO:0003677//DNA binding;GO:0003700//transcription factor activity, sequence-specific DNA binding;GO:0097159//organic cyclic compound binding;GO:1901363//heterocyclic compound binding;GO:0001071//nucleic acid binding transcription factor activity;GO:0005488//binding;GO:0003676//nucleic acid binding	GO:0006725//cellular aromatic compound metabolic process;GO:0009719//response to endogenous stimulus;GO:0044710//single-organism metabolic process;GO:0009987//cellular process;GO:0006807//nitrogen compound metabolic process;GO:0009058//biosynthetic process;GO:0046483//heterocycle metabolic process;GO:0019748//secondary metabolic process;GO:0044238//primary metabolic process;GO:0044237//cellular m…
LOC_Os01g22640	85	30	7.61333	3.13333	-1.28083	9.10482e-05	0.00851733	yes	LOC_Os01g22640	GDSL-like lipase/acylhydrolase, putative, expressed	-	-	-	-	GO:0043231//intracellular membrane-bounded organelle;GO:0044424//intracellular part;GO:0005737//cytoplasm;GO:0043227//membrane-bounded organelle;GO:0044464//cell part;GO:0005623//cell;GO:0009536//plastid;GO:0044444//cytoplasmic part;GO:0005622//intracellular;GO:0043226//organelle;GO:0043229//intracellular organelle	GO:0003824//catalytic activity;GO:0016787//hydrolase activity	GO:0044238//primary metabolic process;GO:0044237//cellular metabolic process;GO:0071704//organic substance metabolic process;GO:0008152//metabolic process;GO:0005975//carbohydrate metabolic process;GO:0006091//generation of precursor metabolites and energy;GO:0009058//biosynthetic process;GO:0006629//lipid metabolic process;GO:0009987//cellular process;GO:0044699//single-organism process;GO:00447…
LOC_Os01g25460	6.33333	0	0.626667	0.001	-9.29155	0.00023484	0.0178012	yes	LOC_Os01g25460	uncharacterized protein At4g06744 precursor, putative, expressed	-	-	-	-	-	GO:0005198//structural molecule activity	-
LOC_Os01g25910	0	6.66667	0.001	1.46667	10.5183	0.000371566	0.0249373	yes	LOC_Os01g25910	retrotransposon protein, putative, unclassified, expressed	-	-	-	-	-	-	-
LOC_Os01g34800	0	6.62	0.001	0.45	8.81378	0.000284828	0.0205138	yes	LOC_Os01g34800	retrotransposon protein, putative, unclassified, expressed	-	-	-	-	-	-	-
LOC_Os01g41420	114	353.667	10.6933	37.2033	1.79872	1.2275e-06	0.000249867	yes	LOC_Os01g41420	transmembrane amino acid transporter protein, putative, expressed	-	-	-	-	GO:0043227//membrane-bounded organelle;GO:0044444//cytoplasmic part;GO:0005773//vacuole;GO:0044464//cell part;GO:0005623//cell;GO:0016020//membrane;GO:0044424//intracellular part;GO:0005622//intracellular;GO:0005737//cytoplasm;GO:0043231//intracellular membrane-bounded organelle;GO:0043226//organelle;GO:0043229//intracellular organelle	GO:0005215//transporter activity	GO:0051234//establishment of localization;GO:0006810//transport;GO:0051179//localization;GO:0009987//cellular process
LOC_Os01g42520	221.333	426	21	46.5	1.14684	8.10099e-06	0.00117957	yes	LOC_Os01g42520	expressed protein	-	-	-	-	GO:0044464//cell part;GO:0030312//external encapsulating structure;GO:0005623//cell;GO:0005618//cell wall;GO:0071944//cell periphery	GO:0003674//molecular_function	GO:0008150//biological_process
LOC_Os01g42790	7.66667	53.6667	1.08667	7.25333	2.73873	0.000178718	0.0144922	yes	LOC_Os01g42790	xylem cysteine proteinase 2 precursor, putative, expressed	-	-	-	-	GO:0005623//cell	GO:0016787//hydrolase activity;GO:0003824//catalytic activity	GO:0071704//organic substance metabolic process;GO:0044238//primary metabolic process;GO:0019538//protein metabolic process;GO:0008152//metabolic process;GO:0043170//macromolecule metabolic process
LOC_Os01g43230	174.337	55.5333	20.8167	7.91	-1.39599	4.35014e-08	1.35199e-05	yes	LOC_Os01g43230	expressed protein	-	-	-	-	GO:0005575//cellular_component	GO:0097159//organic cyclic compound binding;GO:0003676//nucleic acid binding;GO:1901363//heterocyclic compound binding;GO:0003677//DNA binding;GO:0005488//binding	GO:0009987//cellular process;GO:0006807//nitrogen compound metabolic process;GO:0044238//primary metabolic process;GO:0034641//cellular nitrogen compound metabolic process;GO:0006139//nucleobase-containing compound metabolic process;GO:0009058//biosynthetic process;GO:1901360//organic cyclic compound metabolic process;GO:0071704//organic substance metabolic process;GO:0006725//cellular aromatic c…
LOC_Os01g43270	155.333	47	19.0567	6.69667	-1.50878	1.04656e-08	3.76874e-06	yes	LOC_Os01g43270	hydroquinone glucosyltransferase, putative, expressed	-	-	-	-	GO:0005575//cellular_component	GO:0003824//catalytic activity;GO:0016740//transferase activity	GO:0008152//metabolic process
LOC_Os01g43740	89.3267	13.5133	7.88333	1.31	-2.58924	3.0126e-10	1.50585e-07	yes	LOC_Os01g43740	cytochrome P450 72A1, putative, expressed	-	-	-	-	GO:0005623//cell	GO:0019825//oxygen binding;GO:0005488//binding;GO:0003824//catalytic activity;GO:0003674//molecular_function	GO:0008152//metabolic process
LOC_Os01g44069	8	0	0.696667	0.001	-9.44432	9.02372e-06	0.00129701	yes	LOC_Os01g44069	glycerol-3-phosphate acyltransferase, putative, expressed	Metabolism	Lipid metabolism	ko00564//Glycerophospholipid metabolism;ko00561//Glycerolipid metabolism	K13508	GO:0043231//intracellular membrane-bounded organelle;GO:0044424//intracellular part;GO:0005622//intracellular;GO:0044464//cell part;GO:0016020//membrane;GO:0005623//cell;GO:0043229//intracellular organelle;GO:0005739//mitochondrion;GO:0044444//cytoplasmic part;GO:0005737//cytoplasm;GO:0043226//organelle;GO:0043227//membrane-bounded organelle	GO:0003824//catalytic activity;GO:0016740//transferase activity	GO:0044699//single-organism process;GO:0000003//reproduction;GO:0050896//response to stimulus;GO:0032501//multicellular organismal process;GO:0044707//single-multicellular organism process;GO:0044763//single-organism cellular process;GO:0007275//multicellular organism development;GO:0032502//developmental process;GO:0008152//metabolic process;GO:0009628//response to abiotic stimulus;GO:0030154//c…
LOC_Os01g45140	21.6667	2.33333	2.58667	0.32	-3.01495	3.86248e-07	9.44194e-05	yes	LOC_Os01g45140	anthocyanin 3-O-beta-glucosyltransferase, putative, expressed	-	-	-	-	GO:0005829//cytosol;GO:0005623//cell;GO:0005737//cytoplasm;GO:0044444//cytoplasmic part;GO:0044464//cell part;GO:0005622//intracellular;GO:0044424//intracellular part	GO:0003824//catalytic activity;GO:0016740//transferase activity	GO:0008152//metabolic process;GO:0050896//response to stimulus;GO:0009607//response to biotic stimulus
LOC_Os01g45200	24	7	3.29333	1.07	-1.62194	0.000426655	0.0276377	yes	LOC_Os01g45200	cinnamoyl-CoA reductase-related, putative, expressed	-	-	-	-	GO:0005575//cellular_component	GO:0003824//catalytic activity;GO:0005488//binding	GO:0019748//secondary metabolic process;GO:0009987//cellular process;GO:0044699//single-organism process;GO:0009058//biosynthetic process;GO:0044710//single-organism metabolic process;GO:0008152//metabolic process
LOC_Os01g45990	138.667	258	7.23667	15.0367	1.05509	6.15763e-06	0.000928256	yes	LOC_Os01g45990	potassium channel AKT1, putative, expressed	-	-	-	-	GO:0005886//plasma membrane;GO:0044464//cell part;GO:0016020//membrane;GO:0071944//cell periphery;GO:0005623//cell	GO:1901265//nucleoside phosphate binding;GO:0097159//organic cyclic compound binding;GO:0000166//nucleotide binding;GO:0005515//protein binding;GO:0036094//small molecule binding;GO:1901363//heterocyclic compound binding;GO:0005488//binding;GO:0005215//transporter activity	GO:0006950//response to stress;GO:0048869//cellular developmental process;GO:0009987//cellular process;GO:0032501//multicellular organismal process;GO:0009628//response to abiotic stimulus;GO:0044699//single-organism process;GO:0044763//single-organism cellular process;GO:0048856//anatomical structure development;GO:0044707//single-multicellular organism process;GO:0044767//single-organism develo…
LOC_Os01g47400	31.6667	66	3.20667	7.94667	1.30928	0.000266834	0.0193917	yes	LOC_Os01g47400	OsMan01 - Endo-Beta-Mannanase, expressed	Metabolism	Carbohydrate metabolism	ko00051//Fructose and mannose metabolism	K19355	GO:0005623//cell	GO:0005488//binding;GO:0016787//hydrolase activity;GO:0003824//catalytic activity	GO:0005975//carbohydrate metabolic process;GO:0071704//organic substance metabolic process;GO:0044238//primary metabolic process;GO:0008152//metabolic process
LOC_Os01g48620	47.6667	226.667	3.21667	15.6167	2.27945	6.18098e-06	0.000928256	yes	LOC_Os01g48620	expressed protein	-	-	-	-	GO:0005623//cell;GO:0044464//cell part;GO:0043226//organelle;GO:0043227//membrane-bounded organelle;GO:0009536//plastid;GO:0005737//cytoplasm;GO:0005622//intracellular;GO:0043231//intracellular membrane-bounded organelle;GO:0043229//intracellular organelle;GO:0044444//cytoplasmic part;GO:0044424//intracellular part	-	GO:0008150//biological_process
LOC_Os01g51570	152.667	1072.67	23.3767	160.307	2.77769	3.28466e-05	0.00372893	yes	LOC_Os01g51570	glycosyl hydrolases family 17, putative, expressed	-	-	-	-	GO:0005576//extracellular region;GO:0044464//cell part;GO:0043226//organelle;GO:0030312//external encapsulating structure;GO:0043231//intracellular membrane-bounded organelle;GO:0044424//intracellular part;GO:0005773//vacuole;GO:0005623//cell;GO:0005618//cell wall;GO:0043229//intracellular organelle;GO:0005737//cytoplasm;GO:0043227//membrane-bounded organelle;GO:0071944//cell periphery;GO:0005622…	GO:0005515//protein binding;GO:0016787//hydrolase activity;GO:0005488//binding;GO:0003824//catalytic activity	GO:0050896//response to stimulus;GO:0008152//metabolic process;GO:0006950//response to stress;GO:0009607//response to biotic stimulus;GO:0009628//response to abiotic stimulus
LOC_Os01g51670	189	385.333	33.3267	74.15	1.15377	0.000300006	0.0211966	yes	LOC_Os01g51670	expressed protein	-	-	-	-	-	-	-
LOC_Os01g51980	402.04	114.97	36.7067	12.8167	-1.51802	2.65341e-08	8.88628e-06	yes	LOC_Os01g51980	alliin lyase precursor, putative, expressed	-	-	-	-	GO:0005623//cell	GO:0003824//catalytic activity;GO:0005488//binding	GO:0008152//metabolic process
LOC_Os01g52690	0	5.42667	0.001	0.433333	8.75933	0.000321142	0.0222212	yes	LOC_Os01g52690	retrotransposon protein, putative, unclassified, expressed	-	-	-	-	-	-	-
LOC_Os01g53294	143	58.6667	8.88333	4.15333	-1.09683	3.88346e-05	0.0042782	yes	LOC_Os01g53294	respiratory burst oxidase protein B, putative, expressed	Organismal Systems	Environmental adaptation	ko04626//Plant-pathogen interaction	K13447	GO:0044464//cell part;GO:0071944//cell periphery;GO:0005623//cell;GO:0016020//membrane;GO:0005886//plasma membrane	GO:0003824//catalytic activity	GO:0006950//response to stress;GO:0023052//signaling;GO:0007165//signal transduction;GO:0044700//single organism signaling;GO:0050789//regulation of biological process;GO:0050794//regulation of cellular process;GO:0009719//response to endogenous stimulus;GO:0044763//single-organism cellular process;GO:0009058//biosynthetic process;GO:0008152//metabolic process;GO:0050896//response to stimulus;GO:…
LOC_Os01g54620	365.667	142	17.8	8.17333	-1.12288	2.61714e-06	0.000461305	yes	LOC_Os01g54620	CESA4 - cellulose synthase, expressed	-	-	-	-	GO:0005623//cell;GO:0016020//membrane;GO:0071944//cell periphery;GO:0044464//cell part;GO:0005618//cell wall;GO:0005886//plasma membrane;GO:0030312//external encapsulating structure	GO:0003824//catalytic activity;GO:0016740//transferase activity	GO:0008152//metabolic process;GO:0044238//primary metabolic process;GO:0009628//response to abiotic stimulus;GO:0019748//secondary metabolic process;GO:0005975//carbohydrate metabolic process;GO:0050896//response to stimulus;GO:0009058//biosynthetic process;GO:0044699//single-organism process;GO:0071704//organic substance metabolic process;GO:0009607//response to biotic stimulus;GO:0009987//cellu…
LOC_Os01g56330	48.6667	81.8867	2.61667	5.31	1.02098	0.000629752	0.0381381	yes	LOC_Os01g56330	TKL_IRAK_CrRLK1L-1.5 - The CrRLK1L-1 subfamily has homology to the CrRLK1L homolog, expressed	-	-	-	-	GO:0005618//cell wall;GO:0044464//cell part;GO:0005575//cellular_component;GO:0030312//external encapsulating structure;GO:0005886//plasma membrane;GO:0071944//cell periphery;GO:0005623//cell;GO:0016020//membrane	GO:0016301//kinase activity;GO:0016772//transferase activity, transferring phosphorus-containing groups;GO:0016740//transferase activity;GO:0003824//catalytic activity	GO:0044237//cellular metabolic process;GO:0044260//cellular macromolecule metabolic process;GO:0009856//pollination;GO:0044767//single-organism developmental process;GO:0044699//single-organism process;GO:0032502//developmental process;GO:0036211//protein modification process;GO:0006950//response to stress;GO:0071704//organic substance metabolic process;GO:0007275//multicellular organism developm…
LOC_Os01g56370	26.3833	1.93667	2.44	0.206667	-3.5615	3.30483e-07	8.2596e-05	yes	LOC_Os01g56370	wax synthase, putative, expressed	-	-	-	-	GO:0005575//cellular_component	GO:0003674//molecular_function	GO:0008150//biological_process
LOC_Os01g56380	13.6667	1	1.23	0.0966667	-3.6695	3.79061e-05	0.00420356	yes	LOC_Os01g56380	decarboxylase, putative, expressed	Metabolism	Amino acid metabolism;Biosynthesis of other secondary metabolites	ko00350//Tyrosine metabolism;ko00950//Isoquinoline alkaloid biosynthesis	K01592	GO:0005575//cellular_component	GO:0005488//binding;GO:0003824//catalytic activity	GO:0006950//response to stress;GO:0009987//cellular process;GO:0050896//response to stimulus;GO:0008152//metabolic process
LOC_Os01g58810	0	17.92	0.001	0.966667	9.91687	5.89599e-10	2.59811e-07	yes	LOC_Os01g58810	retrotransposon protein, putative, Ty1-copia subclass, expressed	-	-	-	-	-	-	-
LOC_Os01g59150	163	386.333	15.08	41.6	1.46395	1.69901e-08	5.86595e-06	yes	LOC_Os01g59150	tubulin/FtsZ domain containing protein, putative, expressed	Cellular Processes	Transport and catabolism	ko04145//Phagosome	K07375	GO:0016020//membrane;GO:0043226//organelle;GO:0071944//cell periphery;GO:0005623//cell;GO:0043232//intracellular non-membrane-bounded organelle;GO:0005856//cytoskeleton;GO:0043229//intracellular organelle;GO:0044424//intracellular part;GO:0044464//cell part;GO:0005886//plasma membrane;GO:0005622//intracellular;GO:0043228//non-membrane-bounded organelle	GO:0005198//structural molecule activity	GO:0009987//cellular process;GO:0006950//response to stress;GO:0050896//response to stimulus;GO:0009628//response to abiotic stimulus
LOC_Os01g60600	5.44	21.1967	0.55	2.43	2.14345	0.000690367	0.0411395	yes	LOC_Os01g60600	WRKY108, expressed	-	-	-	-	-	GO:0001071//nucleic acid binding transcription factor activity;GO:0003700//transcription factor activity, sequence-specific DNA binding	GO:1901360//organic cyclic compound metabolic process;GO:0006725//cellular aromatic compound metabolic process;GO:0044237//cellular metabolic process;GO:0034641//cellular nitrogen compound metabolic process;GO:0006139//nucleobase-containing compound metabolic process;GO:0006807//nitrogen compound metabolic process;GO:0046483//heterocycle metabolic process;GO:0008152//metabolic process;GO:0009987/…
LOC_Os01g60740	1	18.6667	0.173333	3.34333	4.26967	2.92393e-05	0.00341193	yes	LOC_Os01g60740	LTPL16 - Protease inhibitor/seed storage/LTP family protein precursor, expressed	-	-	-	-	GO:0005623//cell	GO:0005488//binding;GO:0008289//lipid binding	GO:0051234//establishment of localization;GO:0006810//transport;GO:0051179//localization
LOC_Os01g60770	107	196.787	14.1467	28.9367	1.03244	0.000215899	0.016815	yes	LOC_Os01g60770	expansin precursor, putative, expressed	-	-	-	-	GO:0005618//cell wall;GO:0071944//cell periphery;GO:0005623//cell;GO:0044464//cell part;GO:0030312//external encapsulating structure	-	GO:0009653//anatomical structure morphogenesis;GO:0016043//cellular component organization;GO:0071840//cellular component organization or biogenesis;GO:0044699//single-organism process;GO:0032502//developmental process;GO:0040007//growth;GO:0016049//cell growth;GO:0009987//cellular process;GO:0050896//response to stimulus;GO:0044763//single-organism cellular process;GO:0009628//response to abioti…
LOC_Os01g62200	49	0.333333	4.68333	0.0333333	-7.13443	2.88487e-19	5.36746e-16	yes	LOC_Os01g62200	domain of unknown function DUF966 domain containing protein, expressed	-	-	-	-	GO:0016020//membrane;GO:0005575//cellular_component;GO:0044464//cell part;GO:0005623//cell;GO:0005886//plasma membrane;GO:0071944//cell periphery	GO:0003674//molecular_function	GO:0008150//biological_process
LOC_Os01g62480	120	7.33333	9.30333	0.726667	-3.67838	6.90745e-16	9.25323e-13	yes	LOC_Os01g62480	laccase precursor protein, putative, expressed	-	-	-	-	GO:0005576//extracellular region;GO:0005623//cell	GO:0003824//catalytic activity	GO:0008152//metabolic process;GO:0009058//biosynthetic process;GO:0044710//single-organism metabolic process;GO:0044699//single-organism process;GO:0019748//secondary metabolic process;GO:0009987//cellular process
LOC_Os01g62630	27.6667	79.6667	2.86667	9.41667	1.71584	5.62813e-05	0.00579957	yes	LOC_Os01g62630	aspartic proteinase nepenthesin precursor, putative, expressed	-	-	-	-	GO:0005622//intracellular;GO:0043229//intracellular organelle;GO:0005783//endoplasmic reticulum;GO:0043226//organelle;GO:0044444//cytoplasmic part;GO:0044464//cell part;GO:0005623//cell;GO:0043227//membrane-bounded organelle;GO:0044424//intracellular part;GO:0005737//cytoplasm;GO:0043231//intracellular membrane-bounded organelle;GO:0012505//endomembrane system	GO:0003824//catalytic activity;GO:0016787//hydrolase activity	GO:0009790//embryo development;GO:0048856//anatomical structure development;GO:0009791//post-embryonic development;GO:0008219//cell death;GO:0009987//cellular process;GO:0044767//single-organism developmental process;GO:0044707//single-multicellular organism process;GO:0032501//multicellular organismal process;GO:0044763//single-organism cellular process;GO:0000003//reproduction;GO:0008152//metab…
LOC_Os01g63210	132.333	56.3333	24.2033	11.7033	-1.04829	0.000362834	0.0244493	yes	LOC_Os01g63210	SOUL heme-binding protein, putative, expressed	-	-	-	-	GO:0071944//cell periphery;GO:0005886//plasma membrane;GO:0043231//intracellular membrane-bounded organelle;GO:0005622//intracellular;GO:0044444//cytoplasmic part;GO:0005737//cytoplasm;GO:0005623//cell;GO:0005773//vacuole;GO:0044464//cell part;GO:0043229//intracellular organelle;GO:0044424//intracellular part;GO:0043227//membrane-bounded organelle;GO:0016020//membrane;GO:0043226//organelle	GO:0005488//binding	GO:0051716//cellular response to stimulus;GO:0050794//regulation of cellular process;GO:0044700//single organism signaling;GO:0007165//signal transduction;GO:0043412//macromolecule modification;GO:0009058//biosynthetic process;GO:0009987//cellular process;GO:0044238//primary metabolic process;GO:0071704//organic substance metabolic process;GO:0050896//response to stimulus;GO:0050789//regulation o…
LOC_Os01g63560	5.72667	20.29	1.03	4.37	2.08499	0.000415162	0.0271029	yes	LOC_Os01g63560	retrotransposon protein, putative, Ty3-gypsy subclass	-	-	-	-	-	-	-
LOC_Os01g64360	33.3333	158.333	5.08	27.91	2.45788	3.44645e-13	2.89708e-10	yes	LOC_Os01g64360	MYB family transcription factor, putative, expressed	-	-	-	-	-	GO:0003676//nucleic acid binding;GO:0005488//binding;GO:0003700//transcription factor activity, sequence-specific DNA binding;GO:0097159//organic cyclic compound binding;GO:0001071//nucleic acid binding transcription factor activity;GO:0003677//DNA binding;GO:1901363//heterocyclic compound binding	GO:0006725//cellular aromatic compound metabolic process;GO:0034641//cellular nitrogen compound metabolic process;GO:0008152//metabolic process;GO:0006807//nitrogen compound metabolic process;GO:0071704//organic substance metabolic process;GO:0009987//cellular process;GO:0044237//cellular metabolic process;GO:1901360//organic cyclic compound metabolic process;GO:0046483//heterocycle metabolic pro…
LOC_Os01g64380	0	90.6667	0.001	57.89	15.821	2.45912e-40	2.0589e-36	yes	LOC_Os01g64380	expressed protein	-	-	-	-	-	-	-
LOC_Os01g64410	1	26.6667	0.2	7.16	5.16189	2.83966e-14	2.97188e-11	yes	LOC_Os01g64410	ATOFP18/OFP18, putative, expressed	-	-	-	-	GO:0043227//membrane-bounded organelle;GO:0043229//intracellular organelle;GO:0009536//plastid;GO:0044464//cell part;GO:0044444//cytoplasmic part;GO:0043226//organelle;GO:0005623//cell;GO:0044424//intracellular part;GO:0005622//intracellular;GO:0043231//intracellular membrane-bounded organelle;GO:0005737//cytoplasm	-	-
LOC_Os01g64440	9.66667	28.3333	2.15333	6.92333	1.6849	0.000389437	0.0257244	yes	LOC_Os01g64440	expressed protein	-	-	-	-	-	-	-
LOC_Os01g64470	89.3333	263.333	16.07	50.7967	1.66036	1.41309e-06	0.000280026	yes	LOC_Os01g64470	harpin-induced protein 1 domain containing protein, expressed	-	-	-	-	GO:0005622//intracellular;GO:0043226//organelle;GO:0043229//intracellular organelle;GO:0043231//intracellular membrane-bounded organelle;GO:0044464//cell part;GO:0043227//membrane-bounded organelle;GO:0005623//cell;GO:0005737//cytoplasm;GO:0009536//plastid;GO:0044424//intracellular part;GO:0044444//cytoplasmic part	GO:0003674//molecular_function	GO:0009607//response to biotic stimulus;GO:0006950//response to stress;GO:0050896//response to stimulus;GO:0044707//single-multicellular organism process;GO:0044699//single-organism process;GO:0007275//multicellular organism development;GO:0044767//single-organism developmental process;GO:0032501//multicellular organismal process;GO:0032502//developmental process
LOC_Os01g64860	0.666667	13	0.0533333	0.956667	4.16491	0.000192643	0.0153245	yes	LOC_Os01g64860	OsSub11 - Putative Subtilisin homologue, expressed	-	-	-	-	GO:0044464//cell part;GO:0005623//cell;GO:0030312//external encapsulating structure;GO:0005618//cell wall;GO:0071944//cell periphery	GO:0003824//catalytic activity;GO:0005488//binding;GO:0005515//protein binding;GO:0016787//hydrolase activity	GO:0008152//metabolic process;GO:0043170//macromolecule metabolic process;GO:0019538//protein metabolic process;GO:0044238//primary metabolic process;GO:0071704//organic substance metabolic process
LOC_Os01g65010	16.4233	0.333333	1.16333	0.0266667	-5.44708	4.16619e-09	1.64148e-06	yes	LOC_Os01g65010	serine/threonine-protein kinase receptor precursor, putative, expressed	-	-	-	-	GO:0005623//cell	GO:0097159//organic cyclic compound binding;GO:0016301//kinase activity;GO:1901265//nucleoside phosphate binding;GO:1901363//heterocyclic compound binding;GO:0030246//carbohydrate binding;GO:0036094//small molecule binding;GO:0003824//catalytic activity;GO:0000166//nucleotide binding;GO:0016740//transferase activity;GO:0005488//binding;GO:0016772//transferase activity, transferring phosphorus-con…	GO:0008152//metabolic process;GO:0032501//multicellular organismal process;GO:0043412//macromolecule modification;GO:0044267//cellular protein metabolic process;GO:0022414//reproductive process;GO:0044706//multi-multicellular organism process;GO:0009875//pollen-pistil interaction;GO:0019538//protein metabolic process;GO:0044763//single-organism cellular process;GO:0044238//primary metabolic proce…
LOC_Os01g65690	362.63	78.7067	50.1	12.7067	-1.97922	2.86216e-05	0.00336329	yes	LOC_Os01g65690	4,5-DOPA dioxygenase extradiol, putative, expressed	-	-	-	-	-	GO:0003824//catalytic activity;GO:0005488//binding	GO:0008152//metabolic process;GO:0009987//cellular process
LOC_Os01g66010	37.0667	9.69667	3.69333	1.03	-1.84228	9.9336e-05	0.00908952	yes	LOC_Os01g66010	amino acid transporter, putative, expressed	-	-	-	-	GO:0016020//membrane;GO:0071944//cell periphery;GO:0005886//plasma membrane;GO:0005623//cell;GO:0044464//cell part	GO:0005215//transporter activity	GO:0051179//localization;GO:0009987//cellular process;GO:0006810//transport;GO:0051234//establishment of localization
LOC_Os01g66860	30.6667	4.33333	2.56333	0.406667	-2.6561	4.47987e-06	0.000714432	yes	LOC_Os01g66860	serine/threonine protein kinase, putative, expressed	-	-	-	-	-	GO:0016740//transferase activity;GO:0016772//transferase activity, transferring phosphorus-containing groups;GO:0003824//catalytic activity;GO:0016301//kinase activity	GO:0019538//protein metabolic process;GO:0008152//metabolic process;GO:0044238//primary metabolic process;GO:0043170//macromolecule metabolic process;GO:0043412//macromolecule modification;GO:0071704//organic substance metabolic process;GO:0009987//cellular process;GO:0044267//cellular protein metabolic process;GO:0006464//cellular protein modification process;GO:0036211//protein modification pro…
LOC_Os01g67580	240.333	80.6667	9.04667	3.56667	-1.34281	3.63427e-05	0.00407062	yes	LOC_Os01g67580	multidrug resistance-associated protein, putative, expressed	-	-	-	-	GO:0005737//cytoplasm;GO:0044444//cytoplasmic part;GO:0044424//intracellular part;GO:0005622//intracellular;GO:0043229//intracellular organelle;GO:0043226//organelle;GO:0044464//cell part;GO:0016020//membrane;GO:0005773//vacuole;GO:0005623//cell;GO:0043227//membrane-bounded organelle;GO:0043231//intracellular membrane-bounded organelle	GO:0016787//hydrolase activity;GO:0005215//transporter activity;GO:0003824//catalytic activity	GO:0009987//cellular process;GO:0044237//cellular metabolic process;GO:0006810//transport;GO:0044238//primary metabolic process;GO:0071704//organic substance metabolic process;GO:0009607//response to biotic stimulus;GO:0050896//response to stimulus;GO:1901360//organic cyclic compound metabolic process;GO:0009056//catabolic process;GO:0006807//nitrogen compound metabolic process;GO:0006139//nucleo…
LOC_Os01g67810	108.667	227	8.89667	22.94	1.36653	5.40258e-08	1.61547e-05	yes	LOC_Os01g67810	transposon protein, putative, unclassified, expressed	-	-	-	-	-	-	-
LOC_Os01g71720	462.33	145	40.8767	15.3633	-1.41179	2.8885e-08	9.4839e-06	yes	LOC_Os01g71720	amino acid permease family protein, putative, expressed	-	-	-	-	GO:0016020//membrane	GO:0005215//transporter activity	GO:0051179//localization;GO:0009987//cellular process;GO:0051234//establishment of localization;GO:0006810//transport
LOC_Os01g71810	322.047	66.3367	45.9967	10.4533	-2.13757	0.000170467	0.0139243	yes	LOC_Os01g71810	glycosyl hydrolases family 17, putative, expressed	-	-	-	-	GO:0044464//cell part;GO:0043229//intracellular organelle;GO:0043226//organelle;GO:0043231//intracellular membrane-bounded organelle;GO:0044444//cytoplasmic part;GO:0005622//intracellular;GO:0030312//external encapsulating structure;GO:0005618//cell wall;GO:0005773//vacuole;GO:0005737//cytoplasm;GO:0071944//cell periphery;GO:0016020//membrane;GO:0044424//intracellular part;GO:0043227//membrane-bo…	GO:0003824//catalytic activity;GO:0016787//hydrolase activity;GO:0005488//binding	GO:0009607//response to biotic stimulus;GO:0008152//metabolic process;GO:0050896//response to stimulus;GO:0006950//response to stress;GO:0009628//response to abiotic stimulus
LOC_Os01g72510	1	7.66667	0.0933333	0.983333	3.39722	0.000288033	0.0206116	yes	LOC_Os01g72510	eukaryotic aspartyl protease domain containing protein, expressed	-	-	-	-	GO:0044424//intracellular part;GO:0044464//cell part;GO:0005576//extracellular region;GO:0043231//intracellular membrane-bounded organelle;GO:0005737//cytoplasm;GO:0005622//intracellular;GO:0005618//cell wall;GO:0044444//cytoplasmic part;GO:0009536//plastid;GO:0043229//intracellular organelle;GO:0071944//cell periphery;GO:0030312//external encapsulating structure;GO:0043226//organelle;GO:0005623/…	GO:0003824//catalytic activity;GO:0016787//hydrolase activity	GO:0043170//macromolecule metabolic process;GO:0019538//protein metabolic process;GO:0071704//organic substance metabolic process;GO:0044238//primary metabolic process;GO:0008152//metabolic process
LOC_Os01g72520	78	165.667	7.10333	17.25	1.28003	3.66195e-06	0.000613193	yes	LOC_Os01g72520	phosphoesterase family protein, putative, expressed	Metabolism	Carbohydrate metabolism;Lipid metabolism	ko00564//Glycerophospholipid metabolism;ko00565//Ether lipid metabolism;ko00562//Inositol phosphate metabolism	K01114	GO:0005623//cell	GO:0016787//hydrolase activity;GO:0003824//catalytic activity	GO:0009058//biosynthetic process;GO:0009987//cellular process;GO:0044699//single-organism process;GO:0044238//primary metabolic process;GO:0071704//organic substance metabolic process;GO:0006629//lipid metabolic process;GO:0008152//metabolic process;GO:0044710//single-organism metabolic process
LOC_Os01g72530	176.327	321.583	31.9167	64.0067	1.00391	2.34225e-05	0.00287334	yes	LOC_Os01g72530	OsCML31 - Calmodulin-related calcium sensor protein, expressed	Organismal Systems	Environmental adaptation	ko04626//Plant-pathogen interaction	K13448	GO:0005622//intracellular;GO:0005623//cell;GO:0044464//cell part;GO:0005737//cytoplasm;GO:0044424//intracellular part	GO:0005488//binding	GO:0008150//biological_process
LOC_Os01g73790	53	115	4.85667	11.95	1.29897	2.56105e-06	0.000456221	yes	LOC_Os01g73790	NAD dependent epimerase/dehydratase family protein, putative, expressed	Metabolism	Carbohydrate metabolism	ko00520//Amino sugar and nucleotide sugar metabolism	K12449	GO:0005737//cytoplasm;GO:0044444//cytoplasmic part;GO:0044464//cell part;GO:0005576//extracellular region;GO:0005622//intracellular;GO:0005623//cell;GO:0044424//intracellular part;GO:0005829//cytosol	GO:0003824//catalytic activity	GO:0044237//cellular metabolic process;GO:0034641//cellular nitrogen compound metabolic process;GO:0006807//nitrogen compound metabolic process;GO:0006725//cellular aromatic compound metabolic process;GO:0009987//cellular process;GO:0046483//heterocycle metabolic process;GO:0009058//biosynthetic process;GO:1901360//organic cyclic compound metabolic process;GO:0006139//nucleobase-containing compou…
LOC_Os01g73980	4.34	38.4067	0.55	5.47667	3.31579	3.41704e-07	8.47678e-05	yes	LOC_Os01g73980	xylem cysteine proteinase 2 precursor, putative, expressed	-	-	-	-	GO:0071944//cell periphery;GO:0005623//cell;GO:0005618//cell wall;GO:0044464//cell part;GO:0030312//external encapsulating structure	GO:0003824//catalytic activity;GO:0016787//hydrolase activity	GO:0044767//single-organism developmental process;GO:0030154//cell differentiation;GO:0032502//developmental process;GO:0009987//cellular process;GO:0044763//single-organism cellular process;GO:0071704//organic substance metabolic process;GO:0043170//macromolecule metabolic process;GO:0008219//cell death;GO:0044238//primary metabolic process;GO:0008152//metabolic process;GO:0016265//death;GO:0019…
LOC_Os01g74040	352.333	939.333	39.59	125.153	1.66049	1.05703e-15	1.31111e-12	yes	LOC_Os01g74040	zinc finger, RING-type, putative, expressed	-	-	-	-	-	GO:0005488//binding	-
LOC_Os01g74160	24.0233	214.55	3.28667	29.18	3.15028	0.00010836	0.00970315	yes	LOC_Os01g74160	carboxyl-terminal peptidase, putative, expressed	-	-	-	-	GO:0005623//cell	-	GO:0008150//biological_process
LOC_Os02g01060	60.6667	130	11.3133	27.85	1.29965	7.09062e-06	0.0010461	yes	LOC_Os02g01060	harpin-induced protein 1 domain containing protein, expressed	-	-	-	-	GO:0005575//cellular_component	GO:0003674//molecular_function	GO:0008150//biological_process
LOC_Os02g01220	106.647	191.813	13.37	27.5233	1.04166	0.00039402	0.0259248	yes	LOC_Os02g01220	rhodanese-like domain containing protein, putative, expressed	-	-	-	-	-	-	GO:0008150//biological_process
LOC_Os02g01590	50.3333	114	3.35667	8.38333	1.32049	0.000324527	0.0223629	yes	LOC_Os02g01590	glycosyl hydrolases, putative, expressed	Metabolism	Carbohydrate metabolism	ko00500//Starch and sucrose metabolism;ko00052//Galactose metabolism	K01193	GO:0005623//cell;GO:0005773//vacuole;GO:0043227//membrane-bounded organelle;GO:0044464//cell part;GO:0005737//cytoplasm;GO:0043229//intracellular organelle;GO:0044424//intracellular part;GO:0043226//organelle;GO:0044444//cytoplasmic part;GO:0043231//intracellular membrane-bounded organelle;GO:0005622//intracellular	GO:0003824//catalytic activity;GO:0016787//hydrolase activity	GO:0005975//carbohydrate metabolic process;GO:0008152//metabolic process;GO:0071704//organic substance metabolic process;GO:0044238//primary metabolic process
LOC_Os02g01760	0	6.56	0.001	1.8	10.8138	3.22165e-05	0.00367789	yes	LOC_Os02g01760	diphosphomevalonate decarboxylase family protein, expressed	Metabolism	Metabolism of terpenoids and polyketides	ko00900//Terpenoid backbone biosynthesis	K01597	GO:0044444//cytoplasmic part;GO:0005829//cytosol;GO:0044464//cell part;GO:0005737//cytoplasm;GO:0005622//intracellular;GO:0005623//cell;GO:0044424//intracellular part	GO:0003824//catalytic activity;GO:0005488//binding;GO:0005515//protein binding	GO:0044710//single-organism metabolic process;GO:0006629//lipid metabolic process;GO:0009987//cellular process;GO:0044699//single-organism process;GO:0008152//metabolic process;GO:0044238//primary metabolic process;GO:0009058//biosynthetic process;GO:0071704//organic substance metabolic process
LOC_Os02g02040	102	28.6667	7.72333	2.47667	-1.64082	1.68392e-08	5.86595e-06	yes	LOC_Os02g02040	protein kinase, putative, expressed	-	-	-	-	GO:0044444//cytoplasmic part;GO:0043229//intracellular organelle;GO:0071944//cell periphery;GO:0005737//cytoplasm;GO:0043227//membrane-bounded organelle;GO:0005886//plasma membrane;GO:0043231//intracellular membrane-bounded organelle;GO:0044424//intracellular part;GO:0005622//intracellular;GO:0044464//cell part;GO:0012505//endomembrane system;GO:0016020//membrane;GO:0005768//endosome;GO:0043226//…	GO:0016301//kinase activity;GO:0003824//catalytic activity;GO:0016740//transferase activity;GO:0016772//transferase activity, transferring phosphorus-containing groups;GO:0005515//protein binding;GO:0005488//binding	GO:0009987//cellular process;GO:0008152//metabolic process;GO:0008150//biological_process
LOC_Os02g06290	28.0767	6.23	3.74667	0.913333	-2.03639	5.98253e-05	0.00612706	yes	LOC_Os02g06290	rhodanese-like domain containing protein, putative, expressed	-	-	-	-	GO:0005623//cell	GO:0003674//molecular_function	GO:0008150//biological_process
LOC_Os02g06480	80.3633	32.3333	3.83333	1.79	-1.09864	0.000513277	0.0322216	yes	LOC_Os02g06480	SCO1 protein homolog, mitochondrial precursor, putative, expressed	-	-	-	-	GO:0043231//intracellular membrane-bounded organelle;GO:0044464//cell part;GO:0043226//organelle;GO:0043229//intracellular organelle;GO:0005622//intracellular;GO:0044444//cytoplasmic part;GO:0005739//mitochondrion;GO:0044424//intracellular part;GO:0005737//cytoplasm;GO:0005623//cell;GO:0043227//membrane-bounded organelle	GO:0005488//binding	GO:0007275//multicellular organism development;GO:0032501//multicellular organismal process;GO:0044699//single-organism process;GO:0016043//cellular component organization;GO:0032502//developmental process;GO:0044707//single-multicellular organism process;GO:0009987//cellular process;GO:0048856//anatomical structure development;GO:0044767//single-organism developmental process;GO:0009790//embryo …
LOC_Os02g07060	138.017	264.943	13.9733	29.0333	1.05503	0.000361807	0.0244293	yes	LOC_Os02g07060	tubulin/FtsZ domain containing protein, putative, expressed	Cellular Processes	Transport and catabolism	ko04145//Phagosome	K07375	GO:0005622//intracellular;GO:0016020//membrane;GO:0043232//intracellular non-membrane-bounded organelle;GO:0043228//non-membrane-bounded organelle;GO:0044424//intracellular part;GO:0005856//cytoskeleton;GO:0043226//organelle;GO:0044464//cell part;GO:0005623//cell;GO:0043229//intracellular organelle	GO:0005515//protein binding;GO:0005488//binding;GO:0005198//structural molecule activity	GO:0008150//biological_process;GO:0009987//cellular process;GO:0006950//response to stress;GO:0009628//response to abiotic stimulus;GO:0050896//response to stimulus
LOC_Os02g09220	2.26333	10.0767	0.236667	1.15333	2.28488	0.000683091	0.0408513	yes	LOC_Os02g09220	cytochrome P450, putative, expressed	-	-	-	-	GO:0005623//cell	GO:0003674//molecular_function;GO:0003824//catalytic activity;GO:0005488//binding;GO:0019825//oxygen binding	GO:0008152//metabolic process
LOC_Os02g09390	100.987	37.6667	11.1867	5.05	-1.14742	0.000133238	0.0112114	yes	LOC_Os02g09390	cytochrome P450, putative, expressed	-	-	-	-	GO:0005623//cell	GO:0003674//molecular_function;GO:0019825//oxygen binding;GO:0005488//binding;GO:0003824//catalytic activity	GO:0008152//metabolic process
LOC_Os02g09930	66	168.333	5.36	15.31	1.51417	1.13322e-09	4.74392e-07	yes	LOC_Os02g09930	CSLA1 - cellulose synthase-like family A; mannan synthase, expressed	-	-	-	-	-	GO:0016740//transferase activity;GO:0003824//catalytic activity	GO:0008152//metabolic process
LOC_Os02g11070	146.903	481.363	13.39	45.82	1.77482	0.000105459	0.00954545	yes	LOC_Os02g11070	3-ketoacyl-CoA synthase, putative, expressed	Metabolism	Lipid metabolism	ko00062//Fatty acid elongation	K15397	GO:0016020//membrane	GO:0003824//catalytic activity;GO:0016740//transferase activity	GO:0006950//response to stress;GO:0008152//metabolic process;GO:0009628//response to abiotic stimulus;GO:0050896//response to stimulus
LOC_Os02g11640	122.65	49.54	12.13	5.48667	-1.14458	6.71603e-05	0.00679516	yes	LOC_Os02g11640	UDP-glucoronosyl and UDP-glucosyl transferase, putative, expressed	-	-	-	-	GO:0005575//cellular_component	GO:0016740//transferase activity;GO:0003824//catalytic activity	GO:0008152//metabolic process
LOC_Os02g11770	95.3333	37.3333	23.6633	10.3467	-1.19349	9.96663e-05	0.00909489	yes	LOC_Os02g11770	expressed protein	-	-	-	-	-	-	-
LOC_Os02g13190	21.87	6.11333	2.3	0.703333	-1.70935	0.000621767	0.0377228	yes	LOC_Os02g13190	F-box family protein, putative, expressed	-	-	-	-	-	-	-
LOC_Os02g14440	540.667	1232	73.68	190.083	1.36729	7.66739e-07	0.000173501	yes	LOC_Os02g14440	peroxidase precursor, putative, expressed	Metabolism	Biosynthesis of other secondary metabolites	ko00940//Phenylpropanoid biosynthesis	K00430	GO:0005829//cytosol;GO:0005576//extracellular region;GO:0005623//cell;GO:0005622//intracellular;GO:0005618//cell wall;GO:0044464//cell part;GO:0044424//intracellular part;GO:0030312//external encapsulating structure;GO:0005737//cytoplasm;GO:0044444//cytoplasmic part;GO:0071944//cell periphery	GO:0005488//binding;GO:0005515//protein binding;GO:0003824//catalytic activity	GO:0050896//response to stimulus;GO:0006950//response to stress;GO:0008152//metabolic process
LOC_Os02g14680	14.9833	1	1.56333	0.113333	-3.78598	2.32178e-06	0.000427233	yes	LOC_Os02g14680	UDP-glucoronosyl and UDP-glucosyl transferase domain containing protein, expressed	-	-	-	-	-	GO:0003824//catalytic activity;GO:0016740//transferase activity	GO:0009987//cellular process;GO:0008150//biological_process;GO:0008152//metabolic process;GO:0050896//response to stimulus;GO:0006950//response to stress;GO:0009056//catabolic process;GO:0009628//response to abiotic stimulus
LOC_Os02g15280	15.98	39.3333	5.50667	16.58	1.59019	0.000184561	0.0148939	yes	LOC_Os02g15280	VQ domain containing protein, putative, expressed	-	-	-	-	GO:0005575//cellular_component	GO:0003674//molecular_function	GO:0008150//biological_process
LOC_Os02g15860	5.33333	20.6667	2.82	14.13	2.32499	0.000235322	0.0178012	yes	LOC_Os02g15860	expressed protein	-	-	-	-	GO:0005575//cellular_component	GO:0003674//molecular_function	GO:0008150//biological_process
LOC_Os02g16270	128.333	46.5567	5.06	2.07667	-1.28487	1.10641e-06	0.000230824	yes	LOC_Os02g16270	xa1, putative, expressed	-	-	-	-	-	GO:0005488//binding;GO:0005515//protein binding	GO:0050896//response to stimulus;GO:0006950//response to stress
LOC_Os02g20040	105	20	19.3367	4.18333	-2.20861	3.56353e-12	2.59441e-09	yes	LOC_Os02g20040	loricrin, putative, expressed	-	-	-	-	-	-	-
LOC_Os02g21009	121.333	37.3333	11.27	4.18333	-1.42976	3.66769e-05	0.00409437	yes	LOC_Os02g21009	sodium/calcium exchanger protein, putative, expressed	-	-	-	-	GO:0044424//intracellular part;GO:0005623//cell;GO:0044444//cytoplasmic part;GO:0043231//intracellular membrane-bounded organelle;GO:0043227//membrane-bounded organelle;GO:0043229//intracellular organelle;GO:0044464//cell part;GO:0005737//cytoplasm;GO:0043226//organelle;GO:0005773//vacuole;GO:0005622//intracellular;GO:0016020//membrane	GO:0005515//protein binding;GO:0005488//binding;GO:0005215//transporter activity	GO:0006810//transport;GO:0019725//cellular homeostasis;GO:0044699//single-organism process;GO:0008152//metabolic process;GO:0065007//biological regulation;GO:0008150//biological_process;GO:0051179//localization;GO:0065008//regulation of biological quality;GO:0051234//establishment of localization;GO:0044763//single-organism cellular process;GO:0050896//response to stimulus;GO:0009607//response to…
LOC_Os02g32814	213	354	29.2633	61.0467	1.06082	3.19087e-05	0.00366162	yes	LOC_Os02g32814	heavy metal-associated domain containing protein, expressed	-	-	-	-	GO:0005623//cell;GO:0016020//membrane;GO:0044464//cell part;GO:0071944//cell periphery;GO:0005886//plasma membrane	GO:0005215//transporter activity	GO:0019725//cellular homeostasis;GO:0044699//single-organism process;GO:0051234//establishment of localization;GO:0065008//regulation of biological quality;GO:0051179//localization;GO:0042592//homeostatic process;GO:0009987//cellular process;GO:0065007//biological regulation;GO:0044763//single-organism cellular process;GO:0006810//transport
LOC_Os02g33680	93.4	312.767	10.6733	40.7533	1.93291	1.36233e-11	8.29536e-09	yes	LOC_Os02g33680	U-box domain containing protein, expressed	-	-	-	-	-	GO:0005488//binding;GO:0003824//catalytic activity	GO:0009987//cellular process;GO:0044267//cellular protein metabolic process;GO:0044237//cellular metabolic process;GO:0044260//cellular macromolecule metabolic process;GO:0036211//protein modification process;GO:0043170//macromolecule metabolic process;GO:0044238//primary metabolic process;GO:0006464//cellular protein modification process;GO:0008152//metabolic process;GO:0043412//macromolecule mo…
LOC_Os02g33820	507	216	106.04	50.0967	-1.08182	0.000230663	0.0176964	yes	LOC_Os02g33820	abscisic stress-ripening, putative, expressed	-	-	-	-	-	-	-
LOC_Os02g34410	14	50.6667	1.71333	6.97333	2.02504	0.000122126	0.0105958	yes	LOC_Os02g34410	U-box domain-containing protein, putative, expressed	-	-	-	-	GO:0005622//intracellular;GO:0005623//cell;GO:0044464//cell part	GO:0005488//binding;GO:0003824//catalytic activity	GO:0071704//organic substance metabolic process;GO:0009987//cellular process;GO:0044260//cellular macromolecule metabolic process;GO:0019538//protein metabolic process;GO:0043170//macromolecule metabolic process;GO:0036211//protein modification process;GO:0006464//cellular protein modification process;GO:0043412//macromolecule modification;GO:0044237//cellular metabolic process;GO:0044267//cellul…
LOC_Os02g34580	31	112.333	2.93667	11.4333	1.96099	6.57437e-06	0.000978558	yes	LOC_Os02g34580	ammonium transporter protein, putative, expressed	-	-	-	-	GO:0005886//plasma membrane;GO:0005623//cell;GO:0044464//cell part;GO:0071944//cell periphery;GO:0005575//cellular_component;GO:0016020//membrane	GO:0005215//transporter activity	GO:0051179//localization;GO:0050896//response to stimulus;GO:0051234//establishment of localization;GO:0009987//cellular process;GO:0006810//transport;GO:0009607//response to biotic stimulus
LOC_Os02g35530	8.66667	0.333333	1.27	0.0533333	-4.57365	3.07431e-05	0.00357003	yes	LOC_Os02g35530	OsFBK8 - F-box domain and kelch repeat containing protein, expressed	-	-	-	-	GO:0005575//cellular_component	GO:0003674//molecular_function	GO:0008150//biological_process
LOC_Os02g36150	92.49	33.9567	9.17667	3.89333	-1.23696	2.05106e-05	0.00256306	yes	LOC_Os02g36150	cytochrome P450, putative, expressed	Metabolism	Metabolism of terpenoids and polyketides	ko00904//Diterpenoid biosynthesis	K16083	GO:0071944//cell periphery;GO:0016020//membrane;GO:0005623//cell;GO:0044464//cell part;GO:0005886//plasma membrane	GO:0003674//molecular_function;GO:0005488//binding;GO:0003824//catalytic activity;GO:0019825//oxygen binding	GO:0008152//metabolic process
LOC_Os02g36210	107.667	4	6.73667	0.243333	-4.79103	1.60362e-13	1.49181e-10	yes	LOC_Os02g36210	ent-kaurene synthase, chloroplast precursor, putative, expressed	Metabolism	Metabolism of terpenoids and polyketides	ko00904//Diterpenoid biosynthesis	K14043	GO:0005623//cell;GO:0043226//organelle;GO:0043227//membrane-bounded organelle;GO:0044424//intracellular part;GO:0005737//cytoplasm;GO:0005622//intracellular;GO:0044444//cytoplasmic part;GO:0043231//intracellular membrane-bounded organelle;GO:0043229//intracellular organelle;GO:0009536//plastid;GO:0044464//cell part	GO:0003824//catalytic activity;GO:0005488//binding	GO:0009058//biosynthetic process;GO:0044238//primary metabolic process;GO:0023052//signaling;GO:0050789//regulation of biological process;GO:0007165//signal transduction;GO:0006629//lipid metabolic process;GO:0008152//metabolic process;GO:0007154//cell communication;GO:0044710//single-organism metabolic process;GO:0050794//regulation of cellular process;GO:0050896//response to stimulus;GO:0044699…
LOC_Os02g36220	37.6533	6.52333	2.20333	0.446667	-2.30242	7.47342e-07	0.000170415	yes	LOC_Os02g36220	terpene synthase, putative, expressed	Metabolism	Metabolism of terpenoids and polyketides	ko00904//Diterpenoid biosynthesis	K14037	GO:0043229//intracellular organelle;GO:0043226//organelle;GO:0005622//intracellular;GO:0005737//cytoplasm;GO:0009536//plastid;GO:0044464//cell part;GO:0043231//intracellular membrane-bounded organelle;GO:0043227//membrane-bounded organelle;GO:0044444//cytoplasmic part;GO:0005623//cell;GO:0044424//intracellular part	GO:0003824//catalytic activity	GO:0044710//single-organism metabolic process;GO:0009058//biosynthetic process;GO:0007165//signal transduction;GO:0044700//single organism signaling;GO:0050896//response to stimulus;GO:0050789//regulation of biological process;GO:0071704//organic substance metabolic process;GO:0007154//cell communication;GO:0044238//primary metabolic process;GO:0006629//lipid metabolic process;GO:0051716//cellula…
LOC_Os02g36264	24.0133	2.14333	1.44667	0.146667	-3.30212	4.52487e-08	1.38405e-05	yes	LOC_Os02g36264	terpene synthase, putative, expressed	Metabolism	Metabolism of terpenoids and polyketides	ko00904//Diterpenoid biosynthesis	K14037	GO:0005737//cytoplasm;GO:0009536//plastid;GO:0043229//intracellular organelle;GO:0043231//intracellular membrane-bounded organelle;GO:0044444//cytoplasmic part;GO:0043227//membrane-bounded organelle;GO:0044424//intracellular part;GO:0043226//organelle;GO:0044464//cell part;GO:0005622//intracellular;GO:0005623//cell	GO:0003824//catalytic activity	GO:0050896//response to stimulus;GO:0044699//single-organism process;GO:0044700//single organism signaling;GO:0008152//metabolic process;GO:0006629//lipid metabolic process;GO:0051716//cellular response to stimulus;GO:0050794//regulation of cellular process;GO:0007165//signal transduction;GO:0023052//signaling;GO:0071704//organic substance metabolic process;GO:0044238//primary metabolic process;G…
LOC_Os02g37590	24.6667	70.6667	1.57333	5.01333	1.67195	1.32276e-07	3.66109e-05	yes	LOC_Os02g37590	glycerophosphoryl diester phosphodiesterase family protein, putative, expressed	-	-	-	-	GO:0005623//cell;GO:0005618//cell wall;GO:0016020//membrane;GO:0005886//plasma membrane;GO:0030312//external encapsulating structure;GO:0071944//cell periphery;GO:0044464//cell part	GO:0016301//kinase activity;GO:0016772//transferase activity, transferring phosphorus-containing groups;GO:0016740//transferase activity;GO:0016787//hydrolase activity;GO:0003824//catalytic activity	GO:0016049//cell growth;GO:0032502//developmental process;GO:0071840//cellular component organization or biogenesis;GO:0044238//primary metabolic process;GO:0071704//organic substance metabolic process;GO:0016043//cellular component organization;GO:0044707//single-multicellular organism process;GO:0040007//growth;GO:0044767//single-organism developmental process;GO:0007275//multicellular organism…
LOC_Os02g37654	170.907	36.4733	18.8167	4.74667	-1.98702	5.00677e-13	3.9923e-10	yes	LOC_Os02g37654	lecithin:cholesterol acyltransferase, putative, expressed	-	-	-	-	GO:0043227//membrane-bounded organelle;GO:0043229//intracellular organelle;GO:0005773//vacuole;GO:0043226//organelle;GO:0005737//cytoplasm;GO:0005623//cell;GO:0016020//membrane;GO:0044464//cell part;GO:0005622//intracellular;GO:0044424//intracellular part;GO:0044444//cytoplasmic part;GO:0043231//intracellular membrane-bounded organelle	GO:0003824//catalytic activity;GO:0016740//transferase activity	GO:0044699//single-organism process;GO:0071704//organic substance metabolic process;GO:0044238//primary metabolic process;GO:0044710//single-organism metabolic process;GO:0006629//lipid metabolic process;GO:0008152//metabolic process
LOC_Os02g37700	249	13.6667	27.4933	1.75667	-3.96817	1.26865e-30	8.49744e-27	yes	LOC_Os02g37700	lecithin:cholesterol acyltransferase, putative, expressed	-	-	-	-	GO:0043227//membrane-bounded organelle;GO:0044464//cell part;GO:0043226//organelle;GO:0005623//cell;GO:0043229//intracellular organelle;GO:0044424//intracellular part;GO:0043231//intracellular membrane-bounded organelle;GO:0016020//membrane;GO:0005773//vacuole;GO:0005737//cytoplasm;GO:0005622//intracellular;GO:0044444//cytoplasmic part	GO:0003824//catalytic activity;GO:0016740//transferase activity	GO:0044710//single-organism metabolic process;GO:0071704//organic substance metabolic process;GO:0044238//primary metabolic process;GO:0044699//single-organism process;GO:0008152//metabolic process;GO:0006629//lipid metabolic process
LOC_Os02g45710	726	1288.67	98.6567	201.47	1.03008	1.24995e-06	0.000252173	yes	LOC_Os02g45710	zinc finger, C3HC4 type domain containing protein, expressed	-	-	-	-	GO:0005623//cell	GO:0005488//binding	GO:0050896//response to stimulus;GO:0009719//response to endogenous stimulus;GO:0008150//biological_process
LOC_Os02g45780	36	128.333	5.00667	19.85	1.98722	2.74965e-06	0.000482125	yes	LOC_Os02g45780	zinc finger, C3HC4 type domain containing protein, expressed	-	-	-	-	GO:0005623//cell	GO:0005488//binding	-
LOC_Os02g46850	184.667	547.333	12.8133	42.29	1.72267	6.23845e-12	4.26379e-09	yes	LOC_Os02g46850	oligopeptide transporter, putative, expressed	-	-	-	-	GO:0016020//membrane	GO:0005215//transporter activity	GO:0050896//response to stimulus;GO:0006810//transport;GO:0009628//response to abiotic stimulus;GO:0051234//establishment of localization;GO:0051179//localization
LOC_Os02g46860	6.33333	23.6667	1.16667	4.62	1.9855	0.000534402	0.0333901	yes	LOC_Os02g46860	oligopeptide transporter 4, putative, expressed	-	-	-	-	GO:0016020//membrane	GO:0005215//transporter activity	GO:0009628//response to abiotic stimulus;GO:0050896//response to stimulus;GO:0006810//transport;GO:0051234//establishment of localization;GO:0051179//localization
LOC_Os02g46970	39.3333	10.3333	2.89	0.95	-1.60507	0.000121507	0.0105958	yes	LOC_Os02g46970	AMP-binding domain containing protein, expressed	Metabolism	Metabolism of cofactors and vitamins;Amino acid metabolism;Biosynthesis of other secondary metabolites	ko00940//Phenylpropanoid biosynthesis;ko00360//Phenylalanine metabolism;ko00130//Ubiquinone and other terpenoid-quinone biosynthesis	K01904	GO:0005575//cellular_component	GO:0003824//catalytic activity	GO:0044767//single-organism developmental process;GO:0008152//metabolic process;GO:0048856//anatomical structure development;GO:0071840//cellular component organization or biogenesis;GO:0009987//cellular process;GO:0009653//anatomical structure morphogenesis;GO:0007275//multicellular organism development;GO:0009628//response to abiotic stimulus;GO:0044710//single-organism metabolic process;GO:004…
LOC_Os02g47470	142.667	465	11.58	43.5767	1.91192	9.00918e-16	1.16045e-12	yes	LOC_Os02g47470	cytochrome P450, putative, expressed	Metabolism	Metabolism of terpenoids and polyketides	ko00906//Carotenoid biosynthesis	K09843	GO:0005623//cell	GO:0003824//catalytic activity;GO:0019825//oxygen binding;GO:0005488//binding	GO:0009987//cellular process;GO:0044710//single-organism metabolic process;GO:0006950//response to stress;GO:0044767//single-organism developmental process;GO:0000003//reproduction;GO:0009628//response to abiotic stimulus;GO:0007275//multicellular organism development;GO:0009791//post-embryonic development;GO:0009607//response to biotic stimulus;GO:0006629//lipid metabolic process;GO:0071704//org…
LOC_Os02g48570	52	7.33333	3.68	0.64	-2.52356	5.85123e-07	0.000136082	yes	LOC_Os02g48570	peptide transporter PTR2, putative, expressed	-	-	-	-	GO:0044464//cell part;GO:0016020//membrane;GO:0005886//plasma membrane;GO:0005623//cell;GO:0071944//cell periphery	GO:0005215//transporter activity	GO:0009987//cellular process;GO:0051179//localization;GO:0008150//biological_process;GO:0051234//establishment of localization;GO:0006810//transport
LOC_Os02g49060	35.3567	9.16667	2.53	0.753333	-1.74778	5.61683e-05	0.00579957	yes	LOC_Os02g49060	amino acid transporter, putative, expressed	-	-	-	-	GO:0016020//membrane	GO:0005215//transporter activity	GO:0009987//cellular process;GO:0051179//localization;GO:0006810//transport;GO:0051234//establishment of localization
LOC_Os02g51620	10.6667	43.3333	0.643333	3.08333	2.26085	4.35996e-08	1.35199e-05	yes	LOC_Os02g51620	glycosyl hydrolase family 3 protein, putative, expressed	-	-	-	-	GO:0044444//cytoplasmic part;GO:0005576//extracellular region;GO:0043229//intracellular organelle;GO:0030312//external encapsulating structure;GO:0005575//cellular_component;GO:0005622//intracellular;GO:0005623//cell;GO:0044424//intracellular part;GO:0005618//cell wall;GO:0043231//intracellular membrane-bounded organelle;GO:0043226//organelle;GO:0009536//plastid;GO:0005737//cytoplasm;GO:0044464//…	GO:0003824//catalytic activity;GO:0016787//hydrolase activity	GO:0005975//carbohydrate metabolic process;GO:0044238//primary metabolic process;GO:0071704//organic substance metabolic process;GO:0008152//metabolic process
LOC_Os02g51950	8	26.6667	1.18333	4.47	1.91742	0.000119136	0.0105274	yes	LOC_Os02g51950	expressed protein	-	-	-	-	GO:0005623//cell	GO:0003674//molecular_function	GO:0008150//biological_process
LOC_Os02g52010	15.6667	199.667	1.81333	27.51	3.92324	5.72632e-25	1.7434e-21	yes	LOC_Os02g52010	phosphate-induced protein 1 conserved region domain containing protein, expressed	-	-	-	-	GO:0071944//cell periphery;GO:0030312//external encapsulating structure;GO:0044464//cell part;GO:0005618//cell wall;GO:0005623//cell	GO:0003674//molecular_function	GO:0050896//response to stimulus;GO:0009719//response to endogenous stimulus
LOC_Os02g52210	45	140.333	4.70667	15.4133	1.7114	1.55492e-05	0.00202624	yes	LOC_Os02g52210	zinc finger, C3HC4 type domain containing protein, expressed	-	-	-	-	GO:0016020//membrane	GO:0005488//binding;GO:0003824//catalytic activity	GO:0044763//single-organism cellular process;GO:0009605//response to external stimulus;GO:0019538//protein metabolic process;GO:0008150//biological_process;GO:0044267//cellular protein metabolic process;GO:0036211//protein modification process;GO:0043170//macromolecule metabolic process;GO:0044260//cellular macromolecule metabolic process;GO:0006464//cellular protein modification process;GO:00099…
LOC_Os02g54600	139.68	299.577	13.5033	31.4167	1.21821	0.000525748	0.0329109	yes	LOC_Os02g54600	STE_MEK_ste7_MAP2K.5 - STE kinases include homologs to sterile 7, sterile 11 and sterile 20 from yeast, expressed	Organismal Systems	Environmental adaptation	ko04626//Plant-pathogen interaction	K13413	-	GO:0016740//transferase activity;GO:0003824//catalytic activity;GO:0016772//transferase activity, transferring phosphorus-containing groups;GO:0016301//kinase activity	GO:0044702//single organism reproductive process;GO:0009838//abscission;GO:0048367//shoot system development;GO:0044267//cellular protein metabolic process;GO:0048731//system development;GO:0043412//macromolecule modification;GO:0032502//developmental process;GO:0044707//single-multicellular organism process;GO:0071704//organic substance metabolic process;GO:0048856//anatomical structure developm…
LOC_Os02g55870	53	13.3333	4.03	1.24333	-1.69657	7.75693e-06	0.00113441	yes	LOC_Os02g55870	heparanase-like protein precursor, putative, expressed	Metabolism	Glycan biosynthesis and metabolism	ko00531//Glycosaminoglycan degradation	K07964	GO:0030312//external encapsulating structure;GO:0005618//cell wall;GO:0005623//cell;GO:0044464//cell part;GO:0071944//cell periphery	GO:0016787//hydrolase activity;GO:0003824//catalytic activity	GO:0008152//metabolic process;GO:0008150//biological_process
LOC_Os02g56860	6.66667	37	0.606667	3.74667	2.62663	5.67625e-09	2.18503e-06	yes	LOC_Os02g56860	3-ketoacyl-CoA synthase, putative, expressed	Metabolism	Lipid metabolism	ko00062//Fatty acid elongation	K15397	GO:0005783//endoplasmic reticulum;GO:0043229//intracellular organelle;GO:0044464//cell part;GO:0043231//intracellular membrane-bounded organelle;GO:0012505//endomembrane system;GO:0005623//cell;GO:0044424//intracellular part;GO:0005622//intracellular;GO:0043226//organelle;GO:0043227//membrane-bounded organelle;GO:0044444//cytoplasmic part;GO:0005737//cytoplasm	GO:0003824//catalytic activity;GO:0016740//transferase activity	GO:0008152//metabolic process
LOC_Os03g01740	186	375.333	39.7233	89.63	1.174	6.16309e-05	0.00627361	yes	LOC_Os03g01740	expressed protein	-	-	-	-	-	-	-
LOC_Os03g01940	769.167	207.967	43.6067	14.2333	-1.61528	3.24051e-13	2.85592e-10	yes	LOC_Os03g01940	expressed protein	-	-	-	-	-	-	-
LOC_Os03g02040	19.6667	2.33333	2.99333	0.433333	-2.7882	0.000106986	0.00963162	yes	LOC_Os03g02040	remorin, putative, expressed	-	-	-	-	GO:0005575//cellular_component	GO:0003676//nucleic acid binding;GO:0005488//binding;GO:0003677//DNA binding;GO:1901363//heterocyclic compound binding;GO:0097159//organic cyclic compound binding	GO:0008150//biological_process
LOC_Os03g02750	36.3333	147.667	2.50333	10.7433	2.10152	5.71891e-08	1.68006e-05	yes	LOC_Os03g02750	OsSub25 - Putative Subtilisin homologue, expressed	-	-	-	-	GO:0030312//external encapsulating structure;GO:0016020//membrane;GO:0005623//cell;GO:0044464//cell part;GO:0005618//cell wall;GO:0005886//plasma membrane;GO:0071944//cell periphery	GO:0016787//hydrolase activity;GO:0003824//catalytic activity	GO:0019538//protein metabolic process;GO:0048856//anatomical structure development;GO:0008152//metabolic process;GO:0009653//anatomical structure morphogenesis;GO:0044238//primary metabolic process;GO:0044767//single-organism developmental process;GO:0009791//post-embryonic development;GO:0032502//developmental process;GO:0007275//multicellular organism development;GO:0032501//multicellular organ…
LOC_Os03g03810	159	35	49.7067	11.56	-2.1043	4.59786e-08	1.38723e-05	yes	LOC_Os03g03810	DEF8 - Defensin and Defensin-like DEFL family, expressed	-	-	-	-	GO:0005618//cell wall;GO:0071944//cell periphery;GO:0030312//external encapsulating structure;GO:0005623//cell;GO:0005886//plasma membrane;GO:0044464//cell part;GO:0016020//membrane	GO:0030234//enzyme regulator activity;GO:0098772//molecular function regulator	GO:0050896//response to stimulus;GO:0008152//metabolic process;GO:0006950//response to stress
LOC_Os03g04070	73.6667	166.667	10.0567	24.9533	1.31108	0.000236994	0.017876	yes	LOC_Os03g04070	no apical meristem protein, putative, expressed	-	-	-	-	GO:0005575//cellular_component	GO:0003700//transcription factor activity, sequence-specific DNA binding;GO:0001071//nucleic acid binding transcription factor activity	GO:0009653//anatomical structure morphogenesis;GO:0032501//multicellular organismal process;GO:0044767//single-organism developmental process;GO:0008152//metabolic process;GO:0044237//cellular metabolic process;GO:0044707//single-multicellular organism process;GO:0006139//nucleobase-containing compound metabolic process;GO:0006807//nitrogen compound metabolic process;GO:0009058//biosynthetic proc…
LOC_Os03g04110	511.333	920.333	58.4767	117.11	1.00193	1.77858e-06	0.000338435	yes	LOC_Os03g04110	lysM domain-containing GPI-anchored protein precursor, putative, expressed	Organismal Systems	Environmental adaptation	ko04626//Plant-pathogen interaction	K13473	GO:0071944//cell periphery;GO:0005623//cell;GO:0005886//plasma membrane;GO:0044464//cell part;GO:0005575//cellular_component;GO:0016020//membrane	GO:0003674//molecular_function	GO:0008152//metabolic process;GO:0009056//catabolic process
LOC_Os03g05620	419.937	922.193	36.8333	85.8233	1.22036	9.24263e-05	0.00862216	yes	LOC_Os03g05620	inorganic phosphate transporter, putative, expressed	-	-	-	-	GO:0005623//cell;GO:0016020//membrane;GO:0005886//plasma membrane;GO:0044464//cell part;GO:0071944//cell periphery	GO:0005215//transporter activity	GO:0006810//transport;GO:0009987//cellular process;GO:0051234//establishment of localization;GO:0051179//localization
LOC_Os03g07400	25.3333	51	7.41	16.54	1.15841	0.000425743	0.0276321	yes	LOC_Os03g07400	expressed protein	-	-	-	-	-	GO:0003674//molecular_function	GO:0008150//biological_process
LOC_Os03g09120	19.3333	3.33333	2.47667	0.483333	-2.35731	0.000132578	0.0112114	yes	LOC_Os03g09120	expressed protein	-	-	-	-	GO:0005575//cellular_component	GO:0003674//molecular_function	GO:0008150//biological_process
LOC_Os03g09170	24.3333	56.3333	3.18667	8.42667	1.40291	0.000124856	0.0106875	yes	LOC_Os03g09170	ethylene-responsive transcription factor, putative, expressed	-	-	-	-	GO:0005634//nucleus;GO:0043227//membrane-bounded organelle;GO:0044464//cell part;GO:0044424//intracellular part;GO:0043231//intracellular membrane-bounded organelle;GO:0043229//intracellular organelle;GO:0043226//organelle;GO:0005622//intracellular;GO:0005623//cell	GO:0003700//transcription factor activity, sequence-specific DNA binding;GO:1901363//heterocyclic compound binding;GO:0097159//organic cyclic compound binding;GO:0005488//binding;GO:0001071//nucleic acid binding transcription factor activity;GO:0003677//DNA binding;GO:0003676//nucleic acid binding;GO:0005515//protein binding	GO:0007165//signal transduction;GO:0044238//primary metabolic process;GO:0006725//cellular aromatic compound metabolic process;GO:0006807//nitrogen compound metabolic process;GO:0023052//signaling;GO:0050794//regulation of cellular process;GO:0044237//cellular metabolic process;GO:0044700//single organism signaling;GO:0006950//response to stress;GO:0050896//response to stimulus;GO:0006139//nucleo…
LOC_Os03g10260	2.33333	15.6667	0.356667	2.81	2.97792	2.19485e-05	0.00272243	yes	LOC_Os03g10260	expressed protein	-	-	-	-	GO:0005575//cellular_component	GO:0003674//molecular_function	GO:0008150//biological_process
LOC_Os03g11210	4	40	0.703333	7.32333	3.38022	2.11816e-07	5.60118e-05	yes	LOC_Os03g11210	DUF538 domain containing protein, putative, expressed	-	-	-	-	GO:0005575//cellular_component	-	GO:0008150//biological_process
LOC_Os03g12110	32.6667	3.66667	3.92	0.513333	-2.93289	9.65708e-06	0.00137041	yes	LOC_Os03g12110	homocysteine S-methyltransferase protein, putative, expressed	Metabolism	Amino acid metabolism	ko00270//Cysteine and methionine metabolism	K00547	-	GO:0003824//catalytic activity;GO:0016740//transferase activity	GO:0009987//cellular process;GO:0009058//biosynthetic process;GO:0008152//metabolic process
LOC_Os03g12700	240.667	103.333	26.71	12.8933	-1.05075	2.77157e-06	0.000483437	yes	LOC_Os03g12700	expressed protein	-	-	-	-	GO:0005575//cellular_component	GO:0003674//molecular_function	GO:0008150//biological_process
LOC_Os03g13050	18	2.66667	2.33667	0.4	-2.54638	0.000222849	0.0172361	yes	LOC_Os03g13050	E2F-related protein, putative, expressed	-	-	-	-	-	GO:0003674//molecular_function	GO:0008150//biological_process
LOC_Os03g14730	127.333	43	12.8	4.96333	-1.36676	1.52551e-06	0.000293617	yes	LOC_Os03g14730	gibberellin receptor GID1L2, putative, expressed	-	-	-	-	-	GO:0003824//catalytic activity;GO:0016787//hydrolase activity	GO:0008152//metabolic process
LOC_Os03g15050	716	280.333	52.17	23.92	-1.125	1.18453e-05	0.00163925	yes	LOC_Os03g15050	phosphoenolpyruvate carboxykinase, putative, expressed	Metabolism	Global and Overview;Energy metabolism;Carbohydrate metabolism	ko01200//Carbon metabolism;ko00010//Glycolysis / Gluconeogenesis;ko00620//Pyruvate metabolism;ko00710//Carbon fixation in photosynthetic organisms;ko00020//Citrate cycle (TCA cycle)	K01610	GO:0044444//cytoplasmic part;GO:0031974//membrane-enclosed lumen;GO:0043227//membrane-bounded organelle;GO:0005622//intracellular;GO:0043232//intracellular non-membrane-bounded organelle;GO:0044464//cell part;GO:0005623//cell;GO:0005737//cytoplasm;GO:0043233//organelle lumen;GO:0043229//intracellular organelle;GO:0016020//membrane;GO:0044446//intracellular organelle part;GO:0044422//organelle par…	GO:0003824//catalytic activity;GO:0000166//nucleotide binding;GO:1901265//nucleoside phosphate binding;GO:0036094//small molecule binding;GO:0005515//protein binding;GO:0097159//organic cyclic compound binding;GO:0005488//binding;GO:1901363//heterocyclic compound binding	GO:0009991//response to extracellular stimulus;GO:0050896//response to stimulus;GO:0009605//response to external stimulus;GO:0044763//single-organism cellular process;GO:0044699//single-organism process;GO:0009607//response to biotic stimulus;GO:0008150//biological_process;GO:0071704//organic substance metabolic process;GO:0007154//cell communication;GO:0009987//cellular process;GO:0044238//prima…
LOC_Os03g16670	296.333	615.667	38.0067	88.97	1.22707	4.546e-08	1.38405e-05	yes	LOC_Os03g16670	haloacid dehalogenase-like hydrolase family protein, putative, expressed	-	-	-	-	-	GO:0003824//catalytic activity;GO:0016787//hydrolase activity	GO:0008152//metabolic process
LOC_Os03g19070	18.3333	70.6667	2.58	11.0133	2.09381	3.92847e-06	0.000645892	yes	LOC_Os03g19070	long cell-linked locus protein, putative, expressed	-	-	-	-	GO:0005739//mitochondrion;GO:0043231//intracellular membrane-bounded organelle;GO:0044464//cell part;GO:0044424//intracellular part;GO:0043227//membrane-bounded organelle;GO:0043229//intracellular organelle;GO:0005623//cell;GO:0005737//cytoplasm;GO:0005622//intracellular;GO:0043226//organelle;GO:0044444//cytoplasmic part	GO:0003674//molecular_function	GO:0008150//biological_process
LOC_Os03g20090	53.3333	133.667	5.07	15.04	1.56875	5.245e-06	0.000820123	yes	LOC_Os03g20090	MYB family transcription factor, putative, expressed	-	-	-	-	-	GO:0003700//transcription factor activity, sequence-specific DNA binding;GO:0005488//binding;GO:0003676//nucleic acid binding;GO:1901363//heterocyclic compound binding;GO:0003677//DNA binding;GO:0097159//organic cyclic compound binding;GO:0001071//nucleic acid binding transcription factor activity	GO:0009987//cellular process;GO:0071704//organic substance metabolic process;GO:0009058//biosynthetic process;GO:0009628//response to abiotic stimulus;GO:0044238//primary metabolic process;GO:0006725//cellular aromatic compound metabolic process;GO:0009719//response to endogenous stimulus;GO:0008152//metabolic process;GO:0006807//nitrogen compound metabolic process;GO:0046483//heterocycle metabol…
LOC_Os03g20780	58.7267	0	6.63333	0.001	-12.6955	0.000121164	0.0105948	yes	LOC_Os03g20780	ethylene-insensitive 3, putative, expressed	Environmental Information Processing	Signal transduction	ko04075//Plant hormone signal transduction	K14514	GO:0043226//organelle;GO:0043231//intracellular membrane-bounded organelle;GO:0043229//intracellular organelle;GO:0005623//cell;GO:0005634//nucleus;GO:0044464//cell part;GO:0005622//intracellular;GO:0044424//intracellular part;GO:0043227//membrane-bounded organelle	GO:0003677//DNA binding;GO:0005515//protein binding;GO:0003700//transcription factor activity, sequence-specific DNA binding;GO:0003676//nucleic acid binding;GO:1901363//heterocyclic compound binding;GO:0001071//nucleic acid binding transcription factor activity;GO:0097159//organic cyclic compound binding;GO:0005488//binding	GO:0050794//regulation of cellular process;GO:0023052//signaling;GO:0051716//cellular response to stimulus;GO:0009058//biosynthetic process;GO:0046483//heterocycle metabolic process;GO:0009719//response to endogenous stimulus;GO:0006725//cellular aromatic compound metabolic process;GO:0007154//cell communication;GO:0007165//signal transduction;GO:0006807//nitrogen compound metabolic process;GO:00…
LOC_Os03g21640	84.6667	153.333	5.50667	11.4233	1.05273	0.000156354	0.0128973	yes	LOC_Os03g21640	expressed protein	-	-	-	-	-	GO:0005488//binding;GO:0005515//protein binding;GO:0003674//molecular_function	GO:0008150//biological_process
LOC_Os03g22510	5.33333	25.6667	1.01667	5.78	2.50722	9.56079e-06	0.00136834	yes	LOC_Os03g22510	expressed protein	-	-	-	-	-	-	-
LOC_Os03g22634	137	24.6667	9.47333	2.1	-2.17348	5.81477e-10	2.59649e-07	yes	LOC_Os03g22634	terpene synthase, putative, expressed	-	-	-	-	GO:0005575//cellular_component	GO:0003824//catalytic activity	GO:0050896//response to stimulus;GO:0044710//single-organism metabolic process;GO:0044699//single-organism process;GO:0009058//biosynthetic process;GO:0006629//lipid metabolic process;GO:0008152//metabolic process;GO:0044238//primary metabolic process;GO:0009987//cellular process;GO:0009607//response to biotic stimulus;GO:0071704//organic substance metabolic process
LOC_Os03g24760	14.3333	0.333333	1.42333	0.0466667	-4.93074	1.38807e-05	0.00186692	yes	LOC_Os03g24760	terpene synthase, putative, expressed	-	-	-	-	-	GO:0003824//catalytic activity;GO:0005488//binding	GO:0008152//metabolic process
LOC_Os03g24940	30	59.3333	2.29333	5.31333	1.21217	0.000116969	0.0103632	yes	LOC_Os03g24940	proline-rich family protein, putative, expressed	-	-	-	-	GO:0005575//cellular_component	GO:0003674//molecular_function	GO:0008150//biological_process
LOC_Os03g26530	131.963	14	11.5267	1.38	-3.06224	7.2492e-05	0.00722547	yes	LOC_Os03g26530	3-ketoacyl-CoA synthase, putative, expressed	Metabolism	Lipid metabolism	ko00062//Fatty acid elongation	K15397	GO:0005737//cytoplasm;GO:0005783//endoplasmic reticulum;GO:0005623//cell;GO:0043231//intracellular membrane-bounded organelle;GO:0043226//organelle;GO:0043227//membrane-bounded organelle;GO:0005622//intracellular;GO:0012505//endomembrane system;GO:0043229//intracellular organelle;GO:0044464//cell part;GO:0044424//intracellular part;GO:0044444//cytoplasmic part	GO:0016740//transferase activity;GO:0003824//catalytic activity	GO:0008152//metabolic process
LOC_Os03g29930	32	95.6667	5.46333	16.6567	1.60825	0.000245629	0.0181592	yes	LOC_Os03g29930	expressed protein	-	-	-	-	-	-	-
LOC_Os03g30840	443.923	16.6667	68.71	3.1	-4.47018	9.86569e-59	3.30402e-54	yes	LOC_Os03g30840	expressed protein	-	-	-	-	-	-	-
LOC_Os03g31510	67	205.333	13.9067	46.9333	1.75484	4.78857e-07	0.000112936	yes	LOC_Os03g31510	cysteine proteinase inhibitor 8 precursor, putative, expressed	-	-	-	-	GO:0005618//cell wall;GO:0044464//cell part;GO:0071944//cell periphery;GO:0030312//external encapsulating structure;GO:0005623//cell	GO:0098772//molecular function regulator;GO:0030234//enzyme regulator activity	GO:0008152//metabolic process;GO:0008150//biological_process
LOC_Os03g32170	191.333	376.333	18.23	40.98	1.16861	1.2136e-05	0.00167258	yes	LOC_Os03g32170	NAD dependent epimerase/dehydratase family protein, putative, expressed	-	-	-	-	GO:0044444//cytoplasmic part;GO:0044464//cell part;GO:0005623//cell;GO:0005622//intracellular;GO:0044424//intracellular part;GO:0005829//cytosol;GO:0005737//cytoplasm	GO:0003824//catalytic activity	GO:0006950//response to stress;GO:0008152//metabolic process;GO:0044707//single-multicellular organism process;GO:0032502//developmental process;GO:0007275//multicellular organism development;GO:0006629//lipid metabolic process;GO:0044767//single-organism developmental process;GO:0032501//multicellular organismal process;GO:0044710//single-organism metabolic process;GO:0071704//organic substance …
LOC_Os03g32470	125	27	15.81	3.87333	-2.02919	7.43576e-11	4.08235e-08	yes	LOC_Os03g32470	leucoanthocyanidin dioxygenase, putative, expressed	-	-	-	-	GO:0005575//cellular_component	GO:0003824//catalytic activity	GO:0009058//biosynthetic process;GO:0044707//single-multicellular organism process;GO:0032501//multicellular organismal process;GO:0044767//single-organism developmental process;GO:0008152//metabolic process;GO:0044699//single-organism process;GO:0007275//multicellular organism development;GO:0044710//single-organism metabolic process;GO:0009987//cellular process;GO:0019748//secondary metabolic p…
LOC_Os03g33920	5.95667	27.7	1.67	8.09667	2.27748	1.46997e-06	0.000284767	yes	LOC_Os03g33920	conserved hypothetical protein	-	-	-	-	-	-	-
LOC_Os03g36080	64.3333	21.3333	10.23	4.05333	-1.33563	6.13837e-05	0.0062675	yes	LOC_Os03g36080	expressed protein	-	-	-	-	-	-	-
LOC_Os03g36600	0	5.42667	0.001	0.336667	8.39518	0.000611563	0.0374429	yes	LOC_Os03g36600	retrotransposon protein, putative, unclassified, expressed	-	-	-	-	-	-	-
LOC_Os03g37470	113.667	46.3333	14.6533	6.66333	-1.13691	0.000230914	0.0176964	yes	LOC_Os03g37470	MATE efflux family protein, putative, expressed	-	-	-	-	GO:0005622//intracellular;GO:0016020//membrane;GO:0043229//intracellular organelle;GO:0005623//cell;GO:0043226//organelle;GO:0044424//intracellular part;GO:0043231//intracellular membrane-bounded organelle;GO:0044444//cytoplasmic part;GO:0043227//membrane-bounded organelle;GO:0005773//vacuole;GO:0044464//cell part;GO:0005737//cytoplasm	GO:0005215//transporter activity	GO:0006810//transport;GO:0051234//establishment of localization;GO:0051179//localization;GO:0009987//cellular process
LOC_Os03g40670	151	321	17.5833	39.66	1.17348	0.000212778	0.0166106	yes	LOC_Os03g40670	glycerophosphoryl diester phosphodiesterase family protein, putative, expressed	Metabolism	Lipid metabolism	ko00564//Glycerophospholipid metabolism	K01126	GO:0005623//cell	GO:0016787//hydrolase activity;GO:0003824//catalytic activity	GO:0044238//primary metabolic process;GO:0008152//metabolic process;GO:0044699//single-organism process;GO:0071704//organic substance metabolic process;GO:0009987//cellular process;GO:0006629//lipid metabolic process;GO:0005975//carbohydrate metabolic process;GO:0044710//single-organism metabolic process
LOC_Os03g41438	144.507	57.7167	15.8133	7.15667	-1.14378	2.73787e-05	0.00325478	yes	LOC_Os03g41438	serpin domain containing protein, putative, expressed	-	-	-	-	GO:0005576//extracellular region	GO:0030234//enzyme regulator activity;GO:0098772//molecular function regulator	GO:0008150//biological_process;GO:0019538//protein metabolic process;GO:0071704//organic substance metabolic process;GO:0044238//primary metabolic process;GO:0008152//metabolic process;GO:0043170//macromolecule metabolic process
LOC_Os03g45230	5.33333	0	0.723333	0.001	-9.49852	0.000326297	0.0224388	yes	LOC_Os03g45230	expressed protein	-	-	-	-	-	-	-
LOC_Os03g45920	93.7567	215.677	9.18	23.7967	1.37419	2.7719e-07	6.97976e-05	yes	LOC_Os03g45920	tubulin/FtsZ domain containing protein, putative, expressed	Cellular Processes	Transport and catabolism	ko04145//Phagosome	K07375	GO:0044428//nuclear part;GO:0005730//nucleolus;GO:0043229//intracellular organelle;GO:0005575//cellular_component;GO:0070013//intracellular organelle lumen;GO:0031981//nuclear lumen;GO:0044422//organelle part;GO:0005623//cell;GO:0044446//intracellular organelle part;GO:0043227//membrane-bounded organelle;GO:0005618//cell wall;GO:0043226//organelle;GO:0030312//external encapsulating structure;GO:0…	GO:0005488//binding;GO:1901363//heterocyclic compound binding;GO:0000166//nucleotide binding;GO:0097159//organic cyclic compound binding;GO:0036094//small molecule binding;GO:0003824//catalytic activity;GO:0005198//structural molecule activity;GO:1901265//nucleoside phosphate binding;GO:0005515//protein binding;GO:0016787//hydrolase activity	GO:0009056//catabolic process;GO:1901360//organic cyclic compound metabolic process;GO:0009987//cellular process;GO:0006950//response to stress;GO:0008150//biological_process;GO:0034641//cellular nitrogen compound metabolic process;GO:0071704//organic substance metabolic process;GO:0044238//primary metabolic process;GO:0044237//cellular metabolic process;GO:0006139//nucleobase-containing compound…
LOC_Os03g50960	97.3333	32.3333	21.8633	8.18667	-1.41717	0.00010899	0.00971548	yes	LOC_Os03g50960	LTPL118 - Protease inhibitor/seed storage/LTP family protein precursor, expressed	-	-	-	-	-	GO:0008289//lipid binding;GO:0005488//binding	GO:0006950//response to stress;GO:0009607//response to biotic stimulus;GO:0051179//localization;GO:0006810//transport;GO:0051234//establishment of localization;GO:0050896//response to stimulus
LOC_Os03g52070	47.6667	5.66667	3.8	0.583333	-2.70361	1.00058e-06	0.000213436	yes	LOC_Os03g52070	OsSCP20 - Putative Serine Carboxypeptidase homologue, expressed	-	-	-	-	GO:0005623//cell	GO:0016787//hydrolase activity;GO:0003824//catalytic activity	GO:0071704//organic substance metabolic process;GO:0008152//metabolic process;GO:0044238//primary metabolic process;GO:0043170//macromolecule metabolic process;GO:0019538//protein metabolic process
LOC_Os03g55030	134.92	43.2867	13.8567	5.51333	-1.32958	3.40865e-05	0.00385661	yes	LOC_Os03g55030	UDP-glucoronosyl and UDP-glucosyl transferase domain containing protein, expressed	-	-	-	-	GO:0005575//cellular_component	GO:0003824//catalytic activity;GO:0016740//transferase activity	GO:0008152//metabolic process
LOC_Os03g55290	15	82.3333	3.99667	24.5033	2.61611	4.46418e-13	3.64647e-10	yes	LOC_Os03g55290	GASR3 - Gibberellin-regulated GASA/GAST/Snakin family protein precursor, expressed	-	-	-	-	GO:0005623//cell	-	GO:0009719//response to endogenous stimulus;GO:0050896//response to stimulus
LOC_Os03g56820	8.66667	26.6667	1.26333	5.03667	1.99523	0.000331481	0.0227486	yes	LOC_Os03g56820	fatty acid hydroxylase, putative, expressed	-	-	-	-	GO:0005737//cytoplasm;GO:0005623//cell;GO:0043226//organelle;GO:0043229//intracellular organelle;GO:0044464//cell part;GO:0012505//endomembrane system;GO:0044424//intracellular part;GO:0005622//intracellular;GO:0044444//cytoplasmic part;GO:0043231//intracellular membrane-bounded organelle;GO:0043227//membrane-bounded organelle;GO:0005783//endoplasmic reticulum	GO:0003824//catalytic activity	GO:0044763//single-organism cellular process;GO:0008152//metabolic process;GO:0044699//single-organism process;GO:0008219//cell death;GO:0009987//cellular process;GO:0016265//death
LOC_Os03g56840	252.333	89	23.9333	10.2833	-1.21871	8.06809e-05	0.00776225	yes	LOC_Os03g56840	GTP-binding protein, putative, expressed	-	-	-	-	GO:0043229//intracellular organelle;GO:0043226//organelle;GO:0044444//cytoplasmic part;GO:0005622//intracellular;GO:0043227//membrane-bounded organelle;GO:0043231//intracellular membrane-bounded organelle;GO:0005737//cytoplasm;GO:0044464//cell part;GO:0044424//intracellular part;GO:0005623//cell;GO:0009536//plastid	GO:0036094//small molecule binding;GO:0000166//nucleotide binding;GO:0005488//binding;GO:1901265//nucleoside phosphate binding;GO:1901363//heterocyclic compound binding;GO:0097159//organic cyclic compound binding	GO:0008150//biological_process
LOC_Os03g57480	11.8367	0	0.393333	0.001	-8.61961	4.76894e-06	0.000753357	yes	LOC_Os03g57480	retrotransposon protein, putative, unclassified, expressed	-	-	-	-	-	-	-
LOC_Os03g62670	397.667	142.333	64.9933	28.3833	-1.19525	3.80663e-06	0.000631108	yes	LOC_Os03g62670	expressed protein	-	-	-	-	GO:0071944//cell periphery;GO:0005623//cell;GO:0043231//intracellular membrane-bounded organelle;GO:0043229//intracellular organelle;GO:0005886//plasma membrane;GO:0005737//cytoplasm;GO:0043227//membrane-bounded organelle;GO:0044464//cell part;GO:0043226//organelle;GO:0009536//plastid;GO:0016020//membrane;GO:0044424//intracellular part;GO:0044444//cytoplasmic part;GO:0005622//intracellular	GO:0003824//catalytic activity;GO:0016740//transferase activity	GO:0044699//single-organism process;GO:0071704//organic substance metabolic process;GO:0050896//response to stimulus;GO:0006950//response to stress;GO:0009056//catabolic process;GO:0009987//cellular process;GO:0044710//single-organism metabolic process;GO:0019748//secondary metabolic process;GO:0044238//primary metabolic process;GO:0008152//metabolic process;GO:0005975//carbohydrate metabolic pro…
LOC_Os04g01140	313.667	78	27.35	8.14	-1.74844	2.73026e-10	1.3854e-07	yes	LOC_Os04g01140	cytochrome P450 93A2, putative, expressed	-	-	-	-	GO:0005623//cell	GO:0005488//binding;GO:0019825//oxygen binding;GO:0003674//molecular_function;GO:0003824//catalytic activity	GO:0008152//metabolic process
LOC_Os04g01470	24.6667	0.333333	3.49667	0.0433333	-6.33436	5.44668e-05	0.00564735	yes	LOC_Os04g01470	O-methyltransferase, putative, expressed	Metabolism	Biosynthesis of other secondary metabolites	ko00940//Phenylpropanoid biosynthesis	K13066	GO:0005829//cytosol;GO:0043229//intracellular organelle;GO:0044424//intracellular part;GO:0005622//intracellular;GO:0005886//plasma membrane;GO:0016020//membrane;GO:0043226//organelle;GO:0005623//cell;GO:0043231//intracellular membrane-bounded organelle;GO:0005634//nucleus;GO:0044444//cytoplasmic part;GO:0005737//cytoplasm;GO:0071944//cell periphery;GO:0044464//cell part;GO:0043227//membrane-boun…	GO:0005488//binding;GO:0003824//catalytic activity;GO:0005515//protein binding;GO:0016740//transferase activity	GO:0009058//biosynthetic process;GO:0019748//secondary metabolic process;GO:0044699//single-organism process;GO:0008152//metabolic process;GO:0009987//cellular process;GO:0044710//single-organism metabolic process
LOC_Os04g02580	24.31	1.33333	3.42	0.226667	-3.91535	5.9222e-09	2.23961e-06	yes	LOC_Os04g02580	expressed protein	-	-	-	-	GO:0005575//cellular_component	GO:0003674//molecular_function	GO:0008150//biological_process
LOC_Os04g02960	53.8033	14.4167	1.13667	0.353333	-1.68571	2.58755e-06	0.000458503	yes	LOC_Os04g02960	OsSub32 - Putative Subtilisin homologue, expressed	-	-	-	-	-	-	-
LOC_Os04g07110	8.97	48.81	0.71	4.08667	2.52503	5.91729e-08	1.72322e-05	yes	LOC_Os04g07110	expressed protein	-	-	-	-	GO:0044464//cell part;GO:0071944//cell periphery;GO:0016020//membrane;GO:0005623//cell;GO:0005886//plasma membrane	GO:0003674//molecular_function	GO:0008150//biological_process
LOC_Os04g08828	80.8467	27.6667	4.25333	1.67333	-1.34587	2.76802e-05	0.00327565	yes	LOC_Os04g08828	cytochrome P450, putative, expressed	-	-	-	-	GO:0043226//organelle;GO:0044464//cell part;GO:0043227//membrane-bounded organelle;GO:0005623//cell;GO:0044444//cytoplasmic part;GO:0005737//cytoplasm;GO:0044424//intracellular part;GO:0005622//intracellular;GO:0043229//intracellular organelle;GO:0043231//intracellular membrane-bounded organelle;GO:0009536//plastid	GO:0019825//oxygen binding;GO:0005488//binding;GO:0005515//protein binding;GO:0003824//catalytic activity;GO:0003674//molecular_function	GO:0009987//cellular process;GO:0009056//catabolic process;GO:0006950//response to stress;GO:0019748//secondary metabolic process;GO:0044710//single-organism metabolic process;GO:0009607//response to biotic stimulus;GO:0009058//biosynthetic process;GO:0050896//response to stimulus;GO:0044699//single-organism process;GO:0008152//metabolic process
LOC_Os04g10940	75.3333	33	22.73	11.14	-1.02885	0.000795607	0.0462585	yes	LOC_Os04g10940	expressed protein	-	-	-	-	-	-	-
LOC_Os04g15840	4	42.6667	0.566667	7.14	3.65535	3.46023e-13	2.89708e-10	yes	LOC_Os04g15840	expansin precursor, putative, expressed	-	-	-	-	GO:0005618//cell wall;GO:0071944//cell periphery;GO:0005623//cell;GO:0044464//cell part;GO:0030312//external encapsulating structure	-	GO:0071840//cellular component organization or biogenesis;GO:0044763//single-organism cellular process;GO:0016049//cell growth;GO:0009987//cellular process;GO:0009653//anatomical structure morphogenesis;GO:0044699//single-organism process;GO:0016043//cellular component organization;GO:0040007//growth;GO:0048856//anatomical structure development;GO:0032502//developmental process
LOC_Os04g16722	1230.64	4067.05	48.5967	188.29	1.95403	7.48431e-05	0.00741447	yes	LOC_Os04g16722	uncharacterized protein ycf68, putative, expressed	-	-	-	-	-	-	-
LOC_Os04g16896	21.5633	154.097	9.07667	74.4833	3.03668	9.50572e-07	0.000205561	yes	LOC_Os04g16896	uncharacterized protein ycf68, putative	-	-	-	-	-	-	-
LOC_Os04g18770	5.71667	72.8167	0.22	3.20333	3.864	7.49027e-13	5.8337e-10	yes	LOC_Os04g18770	retrotransposon protein, putative, unclassified, expressed	Genetic Information Processing	Translation	ko03008//Ribosome biogenesis in eukaryotes	K14539	-	-	-
LOC_Os04g23550	6	22.3333	0.84	3.37	2.00429	0.000395698	0.0259614	yes	LOC_Os04g23550	basic helix-loop-helix family protein, putative, expressed	-	-	-	-	-	GO:0003700//transcription factor activity, sequence-specific DNA binding;GO:1901363//heterocyclic compound binding;GO:0003677//DNA binding;GO:0097159//organic cyclic compound binding;GO:0001071//nucleic acid binding transcription factor activity;GO:0005488//binding;GO:0003676//nucleic acid binding	GO:0006725//cellular aromatic compound metabolic process;GO:0006139//nucleobase-containing compound metabolic process;GO:0044238//primary metabolic process;GO:1901360//organic cyclic compound metabolic process;GO:0009987//cellular process;GO:0009058//biosynthetic process;GO:0008152//metabolic process;GO:0044237//cellular metabolic process;GO:0034641//cellular nitrogen compound metabolic process;G…
LOC_Os04g24110	133.667	34.6667	11.6733	3.52333	-1.7282	4.08319e-10	1.98182e-07	yes	LOC_Os04g24110	anthocyanin 3-O-beta-glucosyltransferase, putative, expressed	-	-	-	-	GO:0005623//cell	GO:0016740//transferase activity;GO:0003824//catalytic activity	GO:0008152//metabolic process
LOC_Os04g27060	48.3333	14.6767	5.79333	2.01	-1.5272	6.26649e-05	0.00635954	yes	LOC_Os04g27060	oxidoreductase, aldo/keto reductase family protein, putative, expressed	-	-	-	-	GO:0005737//cytoplasm;GO:0044424//intracellular part;GO:0005623//cell;GO:0005622//intracellular;GO:0005829//cytosol;GO:0044464//cell part;GO:0044444//cytoplasmic part	GO:0003824//catalytic activity	GO:0008150//biological_process;GO:0008152//metabolic process
LOC_Os04g27790	26	52.3333	2.34	5.49667	1.23205	0.00023886	0.0179113	yes	LOC_Os04g27790	terpene synthase, putative, expressed	-	-	-	-	GO:0044464//cell part;GO:0005622//intracellular;GO:0044444//cytoplasmic part;GO:0043227//membrane-bounded organelle;GO:0043226//organelle;GO:0005623//cell;GO:0005737//cytoplasm;GO:0044424//intracellular part;GO:0043229//intracellular organelle;GO:0009536//plastid;GO:0043231//intracellular membrane-bounded organelle	GO:0005488//binding;GO:0003824//catalytic activity	GO:0008152//metabolic process
LOC_Os04g29090	20.6667	0	1.76333	0.001	-10.7841	1.0699e-11	6.95227e-09	yes	LOC_Os04g29090	FAD-binding and arabino-lactone oxidase domains containing protein, putative, expressed	-	-	-	-	GO:0071944//cell periphery;GO:0030312//external encapsulating structure;GO:0044464//cell part;GO:0005618//cell wall;GO:0005623//cell	GO:0003824//catalytic activity;GO:0005488//binding	GO:0008152//metabolic process
LOC_Os04g31410	0	7.66667	0.001	1.88	10.8765	1.27747e-05	0.00174622	yes	LOC_Os04g31410	RALFL37 - Rapid ALkalinization Factor RALF family protein precursor, expressed	-	-	-	-	-	-	-
LOC_Os04g31460	0.333333	7.33333	0.0833333	1.84667	4.46989	8.35364e-05	0.00794782	yes	LOC_Os04g31460	RALFL39 - Rapid ALkalinization Factor RALF family protein precursor, expressed	-	-	-	-	-	-	-
LOC_Os04g33450	138.333	30.6667	22.4	6.14667	-1.86562	1.17614e-05	0.0016344	yes	LOC_Os04g33450	expressed protein	-	-	-	-	GO:0005575//cellular_component	GO:0003674//molecular_function	GO:0008150//biological_process
LOC_Os04g34170	142	1531.67	16.2367	202.097	3.63772	5.22988e-29	2.18936e-25	yes	LOC_Os04g34170	retrotransposon protein, putative, unclassified, expressed	-	-	-	-	-	-	-
LOC_Os04g35280	209.623	91.43	16.2567	8.1	-1.00504	1.11562e-05	0.00156984	yes	LOC_Os04g35280	neutral/alkaline invertase, putative, expressed	-	-	-	-	GO:0044424//intracellular part;GO:0005622//intracellular;GO:0005737//cytoplasm;GO:0005829//cytosol;GO:0044444//cytoplasmic part;GO:0005623//cell;GO:0044464//cell part	GO:0016787//hydrolase activity;GO:0003824//catalytic activity	GO:0007275//multicellular organism development;GO:0032502//developmental process;GO:0032501//multicellular organismal process;GO:0044767//single-organism developmental process;GO:0044707//single-multicellular organism process;GO:0044699//single-organism process;GO:0008152//metabolic process
LOC_Os04g38220	100.333	25.6667	8.74667	2.71667	-1.6869	1.05244e-06	0.000221675	yes	LOC_Os04g38220	transporter family protein, putative, expressed	-	-	-	-	GO:0016020//membrane	GO:0005215//transporter activity	GO:0009987//cellular process;GO:0051234//establishment of localization;GO:0006810//transport;GO:0051179//localization
LOC_Os04g38830	3.88	16.5033	0.273333	1.36333	2.31841	0.000190802	0.0153099	yes	LOC_Os04g38830	transposon protein, putative, unclassified, expressed	-	-	-	-	-	-	-
LOC_Os04g39010	19.2333	54.4333	5.21	16	1.61872	9.62878e-06	0.00137041	yes	LOC_Os04g39010	heavy metal associated domain containing protein, expressed	-	-	-	-	GO:0044444//cytoplasmic part;GO:0005623//cell;GO:0043227//membrane-bounded organelle;GO:0043231//intracellular membrane-bounded organelle;GO:0005737//cytoplasm;GO:0044424//intracellular part;GO:0005622//intracellular;GO:0043226//organelle;GO:0005739//mitochondrion;GO:0043229//intracellular organelle;GO:0044464//cell part	GO:0005488//binding	-
LOC_Os04g39380	16	57	4.18333	17.07	2.02874	9.11674e-07	0.000202198	yes	LOC_Os04g39380	heavy metal transport/detoxification protein, putative, expressed	-	-	-	-	-	-	-
LOC_Os04g39610	26.3333	80	1.34667	5.11333	1.92487	1.9406e-08	6.6317e-06	yes	LOC_Os04g39610	glycerophosphoryl diester phosphodiesterase family protein, putative, expressed	-	-	-	-	GO:0005623//cell;GO:0005886//plasma membrane;GO:0030312//external encapsulating structure;GO:0016020//membrane;GO:0044464//cell part;GO:0005575//cellular_component;GO:0071944//cell periphery;GO:0005618//cell wall	GO:0016740//transferase activity;GO:0016301//kinase activity;GO:0016787//hydrolase activity;GO:0016772//transferase activity, transferring phosphorus-containing groups;GO:0003824//catalytic activity	GO:0044767//single-organism developmental process;GO:0040007//growth;GO:0009791//post-embryonic development;GO:0044238//primary metabolic process;GO:0016043//cellular component organization;GO:0007275//multicellular organism development;GO:0071704//organic substance metabolic process;GO:0032502//developmental process;GO:0044763//single-organism cellular process;GO:0048869//cellular developmental …
LOC_Os04g40510	3.85333	28.0533	0.236667	2.04667	3.11235	5.60735e-10	2.5377e-07	yes	LOC_Os04g40510	glycosyl hydrolase family 5 protein, putative, expressed	-	-	-	-	GO:0005623//cell	GO:0016787//hydrolase activity;GO:0003824//catalytic activity;GO:0005488//binding	GO:0008152//metabolic process;GO:0044238//primary metabolic process;GO:0071704//organic substance metabolic process;GO:0005975//carbohydrate metabolic process
LOC_Os04g41680	34.6667	7.33333	5.78	1.23667	-2.22461	0.000565483	0.0350056	yes	LOC_Os04g41680	CHIT3 - Chitinase family protein precursor, expressed	Metabolism	Carbohydrate metabolism	ko00520//Amino sugar and nucleotide sugar metabolism	K01183	GO:0071944//cell periphery;GO:0044464//cell part;GO:0005618//cell wall;GO:0030312//external encapsulating structure;GO:0005623//cell	GO:0016787//hydrolase activity;GO:0003824//catalytic activity	GO:0006950//response to stress;GO:0009987//cellular process;GO:0000003//reproduction;GO:0044707//single-multicellular organism process;GO:0048856//anatomical structure development;GO:0009790//embryo development;GO:0008152//metabolic process;GO:0016265//death;GO:0007275//multicellular organism development;GO:0044767//single-organism developmental process;GO:0050896//response to stimulus;GO:0032502…
LOC_Os04g43290	18.3333	3.66667	1.89667	0.503333	-1.91388	0.000602384	0.0370162	yes	LOC_Os04g43290	ARPC2B, putative, expressed	Cellular Processes	Transport and catabolism	ko04144//Endocytosis	K05758	GO:0005623//cell;GO:0043228//non-membrane-bounded organelle;GO:0043229//intracellular organelle;GO:0044464//cell part;GO:0043232//intracellular non-membrane-bounded organelle;GO:0043226//organelle;GO:0005622//intracellular;GO:0044424//intracellular part;GO:0005856//cytoskeleton	GO:0005198//structural molecule activity	GO:0071840//cellular component organization or biogenesis;GO:0009987//cellular process;GO:0016043//cellular component organization
LOC_Os04g43560	1	8	0.156667	1.21333	2.95321	0.000421701	0.0274228	yes	LOC_Os04g43560	no apical meristem protein, putative, expressed	-	-	-	-	GO:0005575//cellular_component	GO:0003700//transcription factor activity, sequence-specific DNA binding;GO:0001071//nucleic acid binding transcription factor activity	GO:0009058//biosynthetic process;GO:0006725//cellular aromatic compound metabolic process;GO:0046483//heterocycle metabolic process;GO:0006807//nitrogen compound metabolic process;GO:0044767//single-organism developmental process;GO:0034641//cellular nitrogen compound metabolic process;GO:0006139//nucleobase-containing compound metabolic process;GO:0008152//metabolic process;GO:0044699//single-or…
LOC_Os04g44060	0	6.05333	0.001	0.9	9.81378	0.000266932	0.0193917	yes	LOC_Os04g44060	aquaporin protein, putative, expressed	-	-	-	-	GO:0005622//intracellular;GO:0005737//cytoplasm;GO:0005575//cellular_component;GO:0009536//plastid;GO:0044424//intracellular part;GO:0043229//intracellular organelle;GO:0044444//cytoplasmic part;GO:0016020//membrane;GO:0071944//cell periphery;GO:0043227//membrane-bounded organelle;GO:0005886//plasma membrane;GO:0043226//organelle;GO:0043231//intracellular membrane-bounded organelle;GO:0005623//ce…	GO:0005215//transporter activity	GO:0050896//response to stimulus;GO:0009719//response to endogenous stimulus;GO:0051234//establishment of localization;GO:0009987//cellular process;GO:0006810//transport;GO:0009628//response to abiotic stimulus;GO:0051179//localization;GO:0006950//response to stress
LOC_Os04g45290	114.667	42.3333	8.32	3.45	-1.26999	3.38748e-06	0.000581777	yes	LOC_Os04g45290	glycosyl hydrolases, putative, expressed	Metabolism	Carbohydrate metabolism	ko00500//Starch and sucrose metabolism;ko00052//Galactose metabolism	K01193	GO:0005773//vacuole;GO:0043226//organelle;GO:0044424//intracellular part;GO:0043229//intracellular organelle;GO:0043231//intracellular membrane-bounded organelle;GO:0005623//cell;GO:0005622//intracellular;GO:0005737//cytoplasm;GO:0044464//cell part;GO:0044444//cytoplasmic part;GO:0043227//membrane-bounded organelle	GO:0003824//catalytic activity;GO:0016787//hydrolase activity	GO:0071704//organic substance metabolic process;GO:0005975//carbohydrate metabolic process;GO:0008152//metabolic process;GO:0044238//primary metabolic process
LOC_Os04g45950	1.66667	104.333	0.143333	11.3067	6.30166	1.17852e-40	1.97343e-36	yes	LOC_Os04g45950	amino acid permease family protein, putative, expressed	-	-	-	-	GO:0005623//cell;GO:0044464//cell part;GO:0016020//membrane;GO:0005886//plasma membrane;GO:0071944//cell periphery	GO:0005215//transporter activity	GO:0050896//response to stimulus;GO:0009987//cellular process;GO:0051234//establishment of localization;GO:0051179//localization;GO:0006810//transport;GO:0009607//response to biotic stimulus
LOC_Os04g46990	106.33	29.8567	11.1867	3.57	-1.64778	5.95179e-09	2.23961e-06	yes	LOC_Os04g46990	cis-zeatin O-glucosyltransferase, putative, expressed	Metabolism	Metabolism of terpenoids and polyketides	ko00908//Zeatin biosynthesis	K13495	-	GO:0016740//transferase activity;GO:0003824//catalytic activity	GO:0008152//metabolic process;GO:0050896//response to stimulus;GO:0009607//response to biotic stimulus
LOC_Os04g47360	11472.7	2466.67	649.257	153.79	-2.07783	7.3546e-05	0.00730877	yes	LOC_Os04g47360	OsPOP9 - Putative Prolyl Oligopeptidase homologue, expressed	-	-	-	-	GO:0005737//cytoplasm;GO:0043226//organelle;GO:0044444//cytoplasmic part;GO:0009536//plastid;GO:0043231//intracellular membrane-bounded organelle;GO:0043227//membrane-bounded organelle;GO:0005622//intracellular;GO:0043229//intracellular organelle;GO:0044464//cell part;GO:0044424//intracellular part;GO:0005623//cell	GO:0003824//catalytic activity;GO:0016787//hydrolase activity	GO:0044238//primary metabolic process;GO:0008152//metabolic process;GO:0071704//organic substance metabolic process;GO:0043170//macromolecule metabolic process;GO:0019538//protein metabolic process
LOC_Os04g48290	103.333	365.333	4.35	18.1933	2.06432	4.227e-10	1.99383e-07	yes	LOC_Os04g48290	MATE efflux family protein, putative, expressed	-	-	-	-	GO:0016020//membrane	GO:0005215//transporter activity	GO:0006810//transport;GO:0051179//localization;GO:0051234//establishment of localization;GO:0009987//cellular process
LOC_Os04g49690	47.6667	97	3.84667	8.75	1.18567	0.000136733	0.0114472	yes	LOC_Os04g49690	FERONIA receptor-like kinase, putative, expressed	-	-	-	-	GO:0044464//cell part;GO:0016020//membrane;GO:0071944//cell periphery;GO:0005618//cell wall;GO:0005886//plasma membrane;GO:0005623//cell;GO:0030312//external encapsulating structure;GO:0005575//cellular_component	GO:0003824//catalytic activity;GO:0016301//kinase activity;GO:0016740//transferase activity;GO:0016772//transferase activity, transferring phosphorus-containing groups	GO:0044703//multi-organism reproductive process;GO:0009607//response to biotic stimulus;GO:0044707//single-multicellular organism process;GO:0043412//macromolecule modification;GO:0071704//organic substance metabolic process;GO:0036211//protein modification process;GO:0050896//response to stimulus;GO:0009791//post-embryonic development;GO:0019538//protein metabolic process;GO:0044238//primary met…
LOC_Os04g50770	32.6667	1.33333	3.13667	0.15	-4.3862	1.31708e-08	4.64306e-06	yes	LOC_Os04g50770	MYB family transcription factor, putative, expressed	-	-	-	-	-	GO:0097159//organic cyclic compound binding;GO:0003677//DNA binding;GO:1901363//heterocyclic compound binding;GO:0003676//nucleic acid binding;GO:0001071//nucleic acid binding transcription factor activity;GO:0005488//binding;GO:0003700//transcription factor activity, sequence-specific DNA binding	GO:0046483//heterocycle metabolic process;GO:0071704//organic substance metabolic process;GO:0044237//cellular metabolic process;GO:0034641//cellular nitrogen compound metabolic process;GO:0009987//cellular process;GO:0006807//nitrogen compound metabolic process;GO:0006725//cellular aromatic compound metabolic process;GO:0050896//response to stimulus;GO:0008152//metabolic process;GO:0006139//nucl…
LOC_Os04g53606	9.66667	0.666667	1.89	0.13	-3.8618	0.000265722	0.0193879	yes	LOC_Os04g53606	expressed protein	Genetic Information Processing	Translation	ko03013//RNA transport	K03113	-	-	-
LOC_Os04g55159	1.2	45.4	0.123333	4.34	5.13706	3.08074e-05	0.00357003	yes	LOC_Os04g55159	LTPL125 - Protease inhibitor/seed storage/LTP family protein precursor, putative, expressed	-	-	-	-	-	-	-
LOC_Os04g55760	0.666667	7	0.0466667	0.586667	3.65208	0.000467488	0.0298425	yes	LOC_Os04g55760	OsWAK55 - OsWAK receptor-like protein kinase, expressed	-	-	-	-	GO:0005623//cell;GO:0044464//cell part;GO:0016020//membrane;GO:0005886//plasma membrane;GO:0071944//cell periphery	GO:0016772//transferase activity, transferring phosphorus-containing groups;GO:0016740//transferase activity;GO:0016301//kinase activity;GO:0003824//catalytic activity	GO:0009987//cellular process;GO:0044237//cellular metabolic process;GO:0044260//cellular macromolecule metabolic process;GO:0071704//organic substance metabolic process;GO:0036211//protein modification process;GO:0043412//macromolecule modification;GO:0019538//protein metabolic process;GO:0044238//primary metabolic process;GO:0008152//metabolic process;GO:0043170//macromolecule metabolic process;…
LOC_Os04g56100	117	32.3333	24.0667	8.08667	-1.57342	1.42348e-06	0.000280425	yes	LOC_Os04g56100	one cut domain family member 3, putative, expressed	-	-	-	-	-	-	-
LOC_Os04g57880	53.7767	18.5633	3.63	1.53	-1.24644	0.000488416	0.0309792	yes	LOC_Os04g57880	heat shock protein DnaJ, putative, expressed	-	-	-	-	GO:0044424//intracellular part;GO:0043227//membrane-bounded organelle;GO:0009536//plastid;GO:0044464//cell part;GO:0043226//organelle;GO:0005623//cell;GO:0043231//intracellular membrane-bounded organelle;GO:0005737//cytoplasm;GO:0043229//intracellular organelle;GO:0044444//cytoplasmic part;GO:0005622//intracellular	GO:0005515//protein binding;GO:0005488//binding	GO:0019538//protein metabolic process;GO:0008152//metabolic process;GO:0044238//primary metabolic process;GO:0009987//cellular process;GO:0043170//macromolecule metabolic process;GO:0071704//organic substance metabolic process
LOC_Os04g58710	7357.67	2777.33	606.157	261.42	-1.21332	4.14629e-10	1.9837e-07	yes	LOC_Os04g58710	AMP-binding domain containing protein, expressed	-	-	-	-	GO:0005575//cellular_component;GO:0043229//intracellular organelle;GO:0044444//cytoplasmic part;GO:0043231//intracellular membrane-bounded organelle;GO:0044464//cell part;GO:0043227//membrane-bounded organelle;GO:0044424//intracellular part;GO:0005622//intracellular;GO:0005737//cytoplasm;GO:0005576//extracellular region;GO:0043226//organelle;GO:0009536//plastid;GO:0005623//cell	GO:0003824//catalytic activity;GO:0036094//small molecule binding;GO:0005488//binding;GO:1901265//nucleoside phosphate binding;GO:0000166//nucleotide binding;GO:0097159//organic cyclic compound binding;GO:1901363//heterocyclic compound binding	GO:0008152//metabolic process;GO:0008150//biological_process
LOC_Os04g58810	277.333	552.333	30.62	68.1867	1.15502	3.97018e-06	0.000645892	yes	LOC_Os04g58810	CAF1 family ribonuclease containing protein, putative, expressed	Genetic Information Processing	Folding, sorting and degradation	ko03018//RNA degradation	K12581	GO:0043226//organelle;GO:0044464//cell part;GO:0043229//intracellular organelle;GO:0043231//intracellular membrane-bounded organelle;GO:0005622//intracellular;GO:0044424//intracellular part;GO:0005634//nucleus;GO:0043227//membrane-bounded organelle;GO:0005623//cell	GO:0016787//hydrolase activity;GO:0003824//catalytic activity;GO:0004518//nuclease activity;GO:0016788//hydrolase activity, acting on ester bonds	GO:0034641//cellular nitrogen compound metabolic process;GO:0044237//cellular metabolic process;GO:0009987//cellular process;GO:0006139//nucleobase-containing compound metabolic process;GO:0008152//metabolic process;GO:0071704//organic substance metabolic process;GO:0009607//response to biotic stimulus;GO:0046483//heterocycle metabolic process;GO:0050896//response to stimulus;GO:0044238//primary …
LOC_Os04g58850	926.333	1772.33	137.85	301.507	1.12909	1.83678e-07	4.95742e-05	yes	LOC_Os04g58850	harpin-induced protein 1 domain containing protein, expressed	-	-	-	-	GO:0043226//organelle;GO:0044444//cytoplasmic part;GO:0044464//cell part;GO:0009536//plastid;GO:0044424//intracellular part;GO:0043231//intracellular membrane-bounded organelle;GO:0005623//cell;GO:0043227//membrane-bounded organelle;GO:0005622//intracellular;GO:0043229//intracellular organelle;GO:0005737//cytoplasm	GO:0003674//molecular_function	GO:0007275//multicellular organism development;GO:0006950//response to stress;GO:0009607//response to biotic stimulus;GO:0032502//developmental process;GO:0044767//single-organism developmental process;GO:0050896//response to stimulus;GO:0044699//single-organism process;GO:0032501//multicellular organismal process;GO:0044707//single-multicellular organism process
LOC_Os04g59200	346.427	1170.54	41.8267	154.11	1.88147	1.08277e-13	1.03606e-10	yes	LOC_Os04g59200	peroxidase precursor, putative, expressed	Metabolism	Biosynthesis of other secondary metabolites	ko00940//Phenylpropanoid biosynthesis	K00430	GO:0044424//intracellular part;GO:0005737//cytoplasm;GO:0043231//intracellular membrane-bounded organelle;GO:0043226//organelle;GO:0030312//external encapsulating structure;GO:0005622//intracellular;GO:0071944//cell periphery;GO:0005575//cellular_component;GO:0043227//membrane-bounded organelle;GO:0043229//intracellular organelle;GO:0016020//membrane;GO:0005773//vacuole;GO:0005623//cell;GO:000561…	GO:0005488//binding;GO:0003824//catalytic activity	GO:0050896//response to stimulus;GO:0006950//response to stress;GO:0008152//metabolic process
LOC_Os04g59540	52.3333	158.333	2.02667	7.16	1.82085	1.7338e-11	1.03687e-08	yes	LOC_Os04g59540	phosphatidylinositol-4-phosphate 5-Kinase, putative, expressed	Cellular Processes;Environmental Information Processing;Metabolism	Signal transduction;Transport and catabolism;Carbohydrate metabolism	ko04145//Phagosome;ko04070//Phosphatidylinositol signaling system;ko00562//Inositol phosphate metabolism	K00921	-	GO:0016301//kinase activity;GO:1901363//heterocyclic compound binding;GO:0003824//catalytic activity;GO:0005488//binding;GO:0016740//transferase activity;GO:0036094//small molecule binding;GO:0097159//organic cyclic compound binding;GO:0016772//transferase activity, transferring phosphorus-containing groups;GO:1901265//nucleoside phosphate binding;GO:0000166//nucleotide binding	GO:0044699//single-organism process;GO:0071704//organic substance metabolic process;GO:0006629//lipid metabolic process;GO:0009987//cellular process;GO:0043170//macromolecule metabolic process;GO:0019538//protein metabolic process;GO:0044238//primary metabolic process;GO:0044710//single-organism metabolic process;GO:0008152//metabolic process
LOC_Os05g01810	6.66	26.5933	0.83	3.90667	2.23475	0.000148614	0.0122891	yes	LOC_Os05g01810	xylem cysteine proteinase 2 precursor, putative, expressed	-	-	-	-	GO:0030312//external encapsulating structure;GO:0044464//cell part;GO:0005623//cell;GO:0071944//cell periphery;GO:0005618//cell wall	GO:0003824//catalytic activity;GO:0016787//hydrolase activity	GO:0044238//primary metabolic process;GO:0044699//single-organism process;GO:0009987//cellular process;GO:0030154//cell differentiation;GO:0048869//cellular developmental process;GO:0044763//single-organism cellular process;GO:0043170//macromolecule metabolic process;GO:0044767//single-organism developmental process;GO:0071704//organic substance metabolic process;GO:0019538//protein metabolic pro…
LOC_Os05g03450	6.33333	23.3333	0.426667	1.79667	2.07414	2.7353e-05	0.00325478	yes	LOC_Os05g03450	lectin protein kinase family protein, putative, expressed	-	-	-	-	GO:0005623//cell	GO:0003824//catalytic activity;GO:0016740//transferase activity;GO:0016301//kinase activity;GO:0030246//carbohydrate binding;GO:0005488//binding;GO:0016772//transferase activity, transferring phosphorus-containing groups	GO:0071704//organic substance metabolic process;GO:0019538//protein metabolic process;GO:0006464//cellular protein modification process;GO:0044237//cellular metabolic process;GO:0044238//primary metabolic process;GO:0044260//cellular macromolecule metabolic process;GO:0044267//cellular protein metabolic process;GO:0036211//protein modification process;GO:0043170//macromolecule metabolic process;G…
LOC_Os05g04170	295.667	101	21.8233	8.30667	-1.39353	1.14155e-06	0.000235991	yes	LOC_Os05g04170	AMP-binding enzyme, putative, expressed	Cellular Processes;Metabolism	Global and Overview;Transport and catabolism;Lipid metabolism	ko01212//Fatty acid metabolism;ko04146//Peroxisome;ko00061//Fatty acid biosynthesis;ko00071//Fatty acid degradation	K01897	GO:0043231//intracellular membrane-bounded organelle;GO:0005575//cellular_component;GO:0043229//intracellular organelle;GO:0005737//cytoplasm;GO:0044444//cytoplasmic part;GO:0044424//intracellular part;GO:0044464//cell part;GO:0043226//organelle;GO:0012505//endomembrane system;GO:0005622//intracellular;GO:0005783//endoplasmic reticulum;GO:0043227//membrane-bounded organelle;GO:0005623//cell	GO:0003824//catalytic activity	GO:0009058//biosynthetic process;GO:0008152//metabolic process;GO:0044710//single-organism metabolic process;GO:0006629//lipid metabolic process;GO:0071704//organic substance metabolic process;GO:0044699//single-organism process;GO:0044238//primary metabolic process;GO:0009987//cellular process
LOC_Os05g04640	61	10	6.84333	1.29	-2.40733	3.79936e-09	1.51477e-06	yes	LOC_Os05g04640	WRKY5, expressed	-	-	-	-	-	GO:0001071//nucleic acid binding transcription factor activity;GO:0003700//transcription factor activity, sequence-specific DNA binding	GO:0008152//metabolic process;GO:0044238//primary metabolic process;GO:0034641//cellular nitrogen compound metabolic process;GO:0046483//heterocycle metabolic process;GO:0071704//organic substance metabolic process;GO:0044237//cellular metabolic process;GO:0006807//nitrogen compound metabolic process;GO:0006725//cellular aromatic compound metabolic process;GO:0009987//cellular process;GO:1901360/…
LOC_Os05g04820	17.3333	55.6667	0.846667	3.01	1.8299	7.48015e-07	0.000170415	yes	LOC_Os05g04820	MYB family transcription factor, putative, expressed	-	-	-	-	-	GO:0003677//DNA binding;GO:0097159//organic cyclic compound binding;GO:0003700//transcription factor activity, sequence-specific DNA binding;GO:0005488//binding;GO:0001071//nucleic acid binding transcription factor activity;GO:0003676//nucleic acid binding;GO:1901363//heterocyclic compound binding	GO:0009058//biosynthetic process;GO:0044767//single-organism developmental process;GO:0032501//multicellular organismal process;GO:1901360//organic cyclic compound metabolic process;GO:0009719//response to endogenous stimulus;GO:0050896//response to stimulus;GO:0009987//cellular process;GO:0044699//single-organism process;GO:0032502//developmental process;GO:0071704//organic substance metabolic p…
LOC_Os05g05020	126	36.3333	34.1567	10.8733	-1.65137	3.97294e-06	0.000645892	yes	LOC_Os05g05020	expressed protein	-	-	-	-	-	-	-
LOC_Os05g05030	196	65.3333	43.8133	15.86	-1.46598	1.16404e-06	0.000239164	yes	LOC_Os05g05030	expressed protein	-	-	-	-	-	-	-
LOC_Os05g05040	94.6667	18.3333	25.55	5.51	-2.2132	5.92653e-11	3.30799e-08	yes	LOC_Os05g05040	expressed protein	-	-	-	-	-	-	-
LOC_Os05g06110	20.3333	2.66667	1.03333	0.17	-2.6037	3.82882e-05	0.00423192	yes	LOC_Os05g06110	villin, putative, expressed	-	-	-	-	GO:0043226//organelle;GO:0043228//non-membrane-bounded organelle;GO:0005623//cell;GO:0044424//intracellular part;GO:0043232//intracellular non-membrane-bounded organelle;GO:0005622//intracellular;GO:0044464//cell part;GO:0005856//cytoskeleton;GO:0043229//intracellular organelle	GO:0005488//binding;GO:0005515//protein binding	GO:0009987//cellular process;GO:0016043//cellular component organization;GO:0071840//cellular component organization or biogenesis
LOC_Os05g09740	287.657	13.6667	43.9033	2.46667	-4.1537	9.95576e-10	4.22049e-07	yes	LOC_Os05g09740	HAD superfamily phosphatase, putative, expressed	-	-	-	-	-	GO:0016787//hydrolase activity;GO:0003824//catalytic activity	GO:0008152//metabolic process;GO:0008150//biological_process;GO:0009987//cellular process
LOC_Os05g10210	63.6667	1	9.6	0.176667	-5.76393	1.51696e-07	4.16417e-05	yes	LOC_Os05g10210	HAD superfamily phosphatase, putative, expressed	-	-	-	-	-	GO:0003824//catalytic activity;GO:0016787//hydrolase activity	GO:0008150//biological_process;GO:0008152//metabolic process;GO:0009987//cellular process
LOC_Os05g11910	40	152.667	4.52	19.0133	2.07262	7.93432e-11	4.28581e-08	yes	LOC_Os05g11910	GDSL-like lipase/acylhydrolase, putative, expressed	-	-	-	-	GO:0005623//cell	GO:0003824//catalytic activity;GO:0016787//hydrolase activity	GO:0044710//single-organism metabolic process;GO:0008152//metabolic process;GO:0071704//organic substance metabolic process;GO:0006629//lipid metabolic process;GO:0044238//primary metabolic process;GO:0044699//single-organism process
LOC_Os05g12640	135.993	1644.7	19.7833	287.21	3.85975	3.42791e-26	1.27556e-22	yes	LOC_Os05g12640	BURP domain containing protein, expressed	-	-	-	-	GO:0005623//cell	GO:0003674//molecular_function	GO:0006950//response to stress;GO:0009628//response to abiotic stimulus;GO:0050896//response to stimulus;GO:0009719//response to endogenous stimulus
LOC_Os05g18294	119.333	29.6667	13.3567	3.62	-1.8835	1.20374e-08	4.28863e-06	yes	LOC_Os05g18294	SEC14 cytosolic factor family protein, putative, expressed	-	-	-	-	GO:0005575//cellular_component	GO:0003674//molecular_function;GO:0005215//transporter activity	GO:0051234//establishment of localization;GO:0051179//localization;GO:0006810//transport;GO:0008150//biological_process
LOC_Os05g23950	8.51667	0	0.843333	0.001	-9.71996	0.000828841	0.0479411	yes	LOC_Os05g23950	TRAF-type zinc finger family protein, expressed	Metabolism	Metabolism of cofactors and vitamins	ko00130//Ubiquinone and other terpenoid-quinone biosynthesis	K12501	GO:0005622//intracellular;GO:0043229//intracellular organelle;GO:0044444//cytoplasmic part;GO:0009536//plastid;GO:0044424//intracellular part;GO:0043231//intracellular membrane-bounded organelle;GO:0043226//organelle;GO:0043227//membrane-bounded organelle;GO:0044464//cell part;GO:0005623//cell;GO:0005737//cytoplasm	GO:0005488//binding;GO:0003824//catalytic activity;GO:0016740//transferase activity	GO:0008152//metabolic process
LOC_Os05g25350	172.68	346.667	9.5	21.2533	1.16169	0.000225695	0.0173759	yes	LOC_Os05g25350	TKL_IRAK_CrRLK1L-1.12 - The CrRLK1L-1 subfamily has homology to the CrRLK1L homolog, expressed	-	-	-	-	GO:0071944//cell periphery;GO:0005886//plasma membrane;GO:0005575//cellular_component;GO:0016020//membrane;GO:0030312//external encapsulating structure;GO:0044464//cell part;GO:0005623//cell;GO:0005618//cell wall	GO:0016301//kinase activity;GO:0016772//transferase activity, transferring phosphorus-containing groups;GO:0003824//catalytic activity;GO:0016740//transferase activity	GO:0050896//response to stimulus;GO:0032501//multicellular organismal process;GO:0044707//single-multicellular organism process;GO:0032502//developmental process;GO:0006464//cellular protein modification process;GO:0009856//pollination;GO:0051704//multi-organism process;GO:0019538//protein metabolic process;GO:0008152//metabolic process;GO:0022414//reproductive process;GO:0009607//response to bio…
LOC_Os05g33900	209	41.6667	23.6933	5.39333	-2.13523	3.96276e-06	0.000645892	yes	LOC_Os05g33900	auxin-induced protein 5NG4, putative, expressed	-	-	-	-	GO:0016020//membrane	-	-
LOC_Os05g34450	7.66667	26.6667	1.19	4.51667	1.9243	4.16784e-05	0.00452846	yes	LOC_Os05g34450	DUF260 domain containing protein, putative, expressed	-	-	-	-	GO:0043229//intracellular organelle;GO:0043233//organelle lumen;GO:0043227//membrane-bounded organelle;GO:0044422//organelle part;GO:0005634//nucleus;GO:0044464//cell part;GO:0070013//intracellular organelle lumen;GO:0043231//intracellular membrane-bounded organelle;GO:0044446//intracellular organelle part;GO:0044424//intracellular part;GO:0031981//nuclear lumen;GO:0005622//intracellular;GO:00444…	GO:0005488//binding;GO:0005515//protein binding	GO:0003006//developmental process involved in reproduction;GO:0048856//anatomical structure development;GO:0007275//multicellular organism development;GO:0044699//single-organism process;GO:0022414//reproductive process;GO:0048608//reproductive structure development;GO:0061458//reproductive system development;GO:0032501//multicellular organismal process;GO:0009791//post-embryonic development;GO:0…
LOC_Os05g34490	0	5.27	0.001	0.596667	9.22078	0.0003031	0.0213252	yes	LOC_Os05g34490	expressed protein	-	-	-	-	-	-	-
LOC_Os05g35140	144.22	39.8	18.4533	5.95	-1.63292	3.44004e-09	1.38804e-06	yes	LOC_Os05g35140	nodulin MtN3 family protein, putative, expressed	-	-	-	-	GO:0071944//cell periphery;GO:0044464//cell part;GO:0016020//membrane;GO:0005623//cell;GO:0005886//plasma membrane	GO:0005215//transporter activity	GO:0009987//cellular process;GO:0051179//localization;GO:0051234//establishment of localization;GO:0008150//biological_process;GO:0006810//transport
LOC_Os05g35320	1.19333	16.5733	0.216667	2.94333	3.7639	3.49374e-06	0.000590936	yes	LOC_Os05g35320	ATP synthase like protein, putative, expressed	Metabolism	Energy metabolism	ko00190//Oxidative phosphorylation;ko00195//Photosynthesis	K02112	GO:0030312//external encapsulating structure;GO:0044444//cytoplasmic part;GO:0005618//cell wall;GO:0043229//intracellular organelle;GO:0005622//intracellular;GO:0043227//membrane-bounded organelle;GO:0016020//membrane;GO:0044424//intracellular part;GO:0009579//thylakoid;GO:0009536//plastid;GO:0071944//cell periphery;GO:0043231//intracellular membrane-bounded organelle;GO:0005739//mitochondrion;GO…	GO:0005215//transporter activity;GO:0005488//binding	GO:1901360//organic cyclic compound metabolic process;GO:0050896//response to stimulus;GO:0009607//response to biotic stimulus;GO:0051179//localization;GO:0006139//nucleobase-containing compound metabolic process;GO:0044237//cellular metabolic process;GO:0006810//transport;GO:0009058//biosynthetic process;GO:0006725//cellular aromatic compound metabolic process;GO:0046483//heterocycle metabolic p…
LOC_Os05g36990	5.66667	22.3333	0.733333	3.57333	2.28473	0.000346583	0.0234961	yes	LOC_Os05g36990	ATOFP18/OFP18, putative, expressed	-	-	-	-	-	-	GO:0008150//biological_process
LOC_Os05g39990	180.333	343.88	23.8567	51.8633	1.12032	0.000169002	0.0138384	yes	LOC_Os05g39990	expansin precursor, putative, expressed	-	-	-	-	GO:0005623//cell;GO:0044464//cell part;GO:0005618//cell wall;GO:0030312//external encapsulating structure;GO:0071944//cell periphery	-	GO:0016043//cellular component organization;GO:0044763//single-organism cellular process;GO:0040007//growth;GO:0009628//response to abiotic stimulus;GO:0071840//cellular component organization or biogenesis;GO:0016049//cell growth;GO:0044699//single-organism process;GO:0032502//developmental process;GO:0050896//response to stimulus;GO:0009653//anatomical structure morphogenesis;GO:0009719//respon…
LOC_Os05g41460	492.107	212.937	50.6867	25.0967	-1.01411	9.58488e-05	0.0088919	yes	LOC_Os05g41460	cysteine proteinase inhibitor precursor protein, putative, expressed	-	-	-	-	GO:0044444//cytoplasmic part;GO:0005623//cell;GO:0044424//intracellular part;GO:0005622//intracellular;GO:0005737//cytoplasm;GO:0005829//cytosol;GO:0044464//cell part	GO:0030234//enzyme regulator activity;GO:0098772//molecular function regulator;GO:0005488//binding	GO:0009628//response to abiotic stimulus;GO:0008152//metabolic process;GO:0050896//response to stimulus
LOC_Os05g43940	6.72	0	0.853333	0.001	-9.73697	0.000239733	0.0179211	yes	LOC_Os05g43940	O-methyltransferase, putative, expressed	-	-	-	-	GO:0005737//cytoplasm;GO:0044424//intracellular part;GO:0044464//cell part;GO:0044444//cytoplasmic part;GO:0005622//intracellular;GO:0005829//cytosol;GO:0005623//cell	GO:0016740//transferase activity;GO:0003824//catalytic activity;GO:0005488//binding;GO:0005515//protein binding	GO:0009987//cellular process;GO:0008152//metabolic process
LOC_Os05g45180	88	24.3333	8.70333	2.86333	-1.60387	0.000258944	0.018976	yes	LOC_Os05g45180	anthocyanidin 5,3-O-glucosyltransferase, putative, expressed	-	-	-	-	GO:0005737//cytoplasm;GO:0005623//cell;GO:0044424//intracellular part;GO:0005622//intracellular;GO:0044444//cytoplasmic part;GO:0005829//cytosol;GO:0044464//cell part	GO:0003824//catalytic activity;GO:0016740//transferase activity	GO:0008152//metabolic process
LOC_Os05g45370	6.66667	0.333333	0.853333	0.0466667	-4.19265	0.000467792	0.0298425	yes	LOC_Os05g45370	cell cycle control protein, putative, expressed	-	-	-	-	GO:0016020//membrane	-	GO:0008150//biological_process
LOC_Os05g46860	11.95	1.42333	6.85	1.06667	-2.68299	0.000310363	0.0217449	yes	LOC_Os05g46860	FHA domain containing protein, putative, expressed	-	-	-	-	GO:0043227//membrane-bounded organelle;GO:0044444//cytoplasmic part;GO:0005622//intracellular;GO:0009536//plastid;GO:0005737//cytoplasm;GO:0043231//intracellular membrane-bounded organelle;GO:0043229//intracellular organelle;GO:0005623//cell;GO:0005829//cytosol;GO:0005634//nucleus;GO:0044424//intracellular part;GO:0043226//organelle;GO:0044464//cell part	GO:0097159//organic cyclic compound binding;GO:0003676//nucleic acid binding;GO:1901363//heterocyclic compound binding;GO:0003723//RNA binding;GO:0005515//protein binding;GO:0005488//binding;GO:0003674//molecular_function	GO:0050789//regulation of biological process;GO:0040029//regulation of gene expression, epigenetic;GO:1901360//organic cyclic compound metabolic process;GO:0071704//organic substance metabolic process;GO:0044237//cellular metabolic process;GO:0010468//regulation of gene expression;GO:0009987//cellular process;GO:0046483//heterocycle metabolic process;GO:0008150//biological_process;GO:0006725//cel…
LOC_Os05g49240	37.8067	3.63667	9.40667	1.30333	-2.85148	9.4307e-05	0.00877317	yes	LOC_Os05g49240	homeodomain-related, putative, expressed	-	-	-	-	-	GO:0003700//transcription factor activity, sequence-specific DNA binding;GO:0003676//nucleic acid binding;GO:0001071//nucleic acid binding transcription factor activity;GO:0097159//organic cyclic compound binding;GO:1901363//heterocyclic compound binding;GO:0005488//binding;GO:0003677//DNA binding	GO:0044237//cellular metabolic process;GO:1901360//organic cyclic compound metabolic process;GO:0006807//nitrogen compound metabolic process;GO:0008152//metabolic process;GO:0034641//cellular nitrogen compound metabolic process;GO:0044238//primary metabolic process;GO:0046483//heterocycle metabolic process;GO:0009058//biosynthetic process;GO:0006139//nucleobase-containing compound metabolic proce…
LOC_Os05g49370	114.667	44	18.8067	8.78333	-1.0984	0.000241155	0.0179473	yes	LOC_Os05g49370	DUF1645 domain containing protein, putative, expressed	-	-	-	-	-	GO:0003674//molecular_function	GO:0008150//biological_process
LOC_Os05g49700	4.66667	19.3333	0.746667	3.20667	2.10254	0.000202299	0.0159376	yes	LOC_Os05g49700	AP2 domain containing protein, expressed	-	-	-	-	GO:0005622//intracellular;GO:0005634//nucleus;GO:0043226//organelle;GO:0043229//intracellular organelle;GO:0005623//cell;GO:0044464//cell part;GO:0043227//membrane-bounded organelle;GO:0044424//intracellular part;GO:0043231//intracellular membrane-bounded organelle	GO:0003676//nucleic acid binding;GO:0097159//organic cyclic compound binding;GO:0003677//DNA binding;GO:0001071//nucleic acid binding transcription factor activity;GO:0005488//binding;GO:1901363//heterocyclic compound binding;GO:0003700//transcription factor activity, sequence-specific DNA binding	GO:0034641//cellular nitrogen compound metabolic process;GO:0071704//organic substance metabolic process;GO:0008150//biological_process;GO:1901360//organic cyclic compound metabolic process;GO:0006807//nitrogen compound metabolic process;GO:0046483//heterocycle metabolic process;GO:0044237//cellular metabolic process;GO:0006725//cellular aromatic compound metabolic process;GO:0044238//primary met…
LOC_Os05g51570	18	46	1.88333	5.38667	1.5161	0.000441585	0.0284397	yes	LOC_Os05g51570	vacuolar-processing enzyme precursor, putative, expressed	-	-	-	-	GO:0044424//intracellular part;GO:0043227//membrane-bounded organelle;GO:0044444//cytoplasmic part;GO:0043226//organelle;GO:0043231//intracellular membrane-bounded organelle;GO:0044464//cell part;GO:0043229//intracellular organelle;GO:0005737//cytoplasm;GO:0005773//vacuole;GO:0005622//intracellular;GO:0005623//cell	GO:0016787//hydrolase activity;GO:0003824//catalytic activity	GO:0019538//protein metabolic process;GO:0044238//primary metabolic process;GO:0043170//macromolecule metabolic process;GO:0071704//organic substance metabolic process;GO:0008152//metabolic process;GO:0009987//cellular process
LOC_Os06g01760	119	46.6667	10.4067	4.39	-1.24522	0.000636254	0.0384624	yes	LOC_Os06g01760	ligA, putative, expressed	-	-	-	-	-	-	-
LOC_Os06g03900	15.3333	1.66667	2.61333	0.32	-3.02975	8.23662e-05	0.00785882	yes	LOC_Os06g03900	esterase precursor, putative, expressed	-	-	-	-	GO:0044444//cytoplasmic part;GO:0043231//intracellular membrane-bounded organelle;GO:0005737//cytoplasm;GO:0043227//membrane-bounded organelle;GO:0005773//vacuole;GO:0005623//cell;GO:0044464//cell part;GO:0043226//organelle;GO:0043229//intracellular organelle;GO:0005622//intracellular;GO:0044424//intracellular part	GO:0003824//catalytic activity;GO:0016787//hydrolase activity	GO:0044710//single-organism metabolic process;GO:0044699//single-organism process;GO:0044238//primary metabolic process;GO:0008152//metabolic process;GO:0071704//organic substance metabolic process;GO:0006629//lipid metabolic process
LOC_Os06g03970	31.3333	70.3333	1.37333	3.76667	1.45561	3.65084e-06	0.000613193	yes	LOC_Os06g03970	receptor-like protein kinase 5 precursor, putative, expressed	-	-	-	-	GO:0005623//cell	GO:0003824//catalytic activity;GO:0016740//transferase activity;GO:0016772//transferase activity, transferring phosphorus-containing groups;GO:0016301//kinase activity	GO:0000003//reproduction;GO:0022414//reproductive process;GO:0007275//multicellular organism development;GO:0048856//anatomical structure development;GO:0044707//single-multicellular organism process;GO:0048367//shoot system development;GO:0048608//reproductive structure development;GO:0044699//single-organism process;GO:0044702//single organism reproductive process;GO:0090567//reproductive shoot…
LOC_Os06g04920	153	459.667	19.5367	71.64	1.87458	2.26557e-14	2.44754e-11	yes	LOC_Os06g04920	zinc finger family protein, putative, expressed	Cellular Processes;Metabolism	Metabolism of cofactors and vitamins;Transport and catabolism	ko04146//Peroxisome;ko00760//Nicotinate and nicotinamide metabolism	K03426	GO:0005623//cell;GO:0005622//intracellular;GO:0044464//cell part	GO:0005488//binding	GO:0008150//biological_process
LOC_Os06g06250	69.6667	274.667	8.38333	34.3067	2.03289	3.53771e-05	0.00397577	yes	LOC_Os06g06250	GDSL-like lipase/acylhydrolase, putative, expressed	-	-	-	-	GO:0005623//cell	GO:0016787//hydrolase activity;GO:0003824//catalytic activity	GO:0008152//metabolic process;GO:0044699//single-organism process;GO:0044238//primary metabolic process;GO:0006629//lipid metabolic process;GO:0071704//organic substance metabolic process;GO:0044710//single-organism metabolic process
LOC_Os06g06290	909.333	1919.67	84.0333	200.653	1.25567	3.97907e-08	1.28134e-05	yes	LOC_Os06g06290	GDSL-like lipase/acylhydrolase, putative, expressed	-	-	-	-	GO:0071944//cell periphery;GO:0005623//cell;GO:0005618//cell wall;GO:0030312//external encapsulating structure;GO:0044464//cell part	GO:0003824//catalytic activity;GO:0016787//hydrolase activity	GO:0044710//single-organism metabolic process;GO:0044238//primary metabolic process;GO:0008152//metabolic process;GO:0044699//single-organism process;GO:0071704//organic substance metabolic process;GO:0006629//lipid metabolic process
LOC_Os06g06440	43.44	15.1033	1.58333	0.613333	-1.36822	0.000282279	0.020418	yes	LOC_Os06g06440	ABC transporter, ATP-binding protein, putative, expressed	-	-	-	-	GO:0005622//intracellular;GO:0044444//cytoplasmic part;GO:0044424//intracellular part;GO:0005773//vacuole;GO:0016020//membrane;GO:0005623//cell;GO:0043226//organelle;GO:0043229//intracellular organelle;GO:0005737//cytoplasm;GO:0043227//membrane-bounded organelle;GO:0043231//intracellular membrane-bounded organelle;GO:0044464//cell part	GO:0016787//hydrolase activity;GO:0003824//catalytic activity;GO:0005215//transporter activity	GO:0009056//catabolic process;GO:0044237//cellular metabolic process;GO:0051234//establishment of localization;GO:0071704//organic substance metabolic process;GO:0046483//heterocycle metabolic process;GO:0006725//cellular aromatic compound metabolic process;GO:0034641//cellular nitrogen compound metabolic process;GO:0008152//metabolic process;GO:0006807//nitrogen compound metabolic process;GO:005…
LOC_Os06g08830	43.6667	15.3333	4.48333	1.82667	-1.29536	0.000388205	0.0257182	yes	LOC_Os06g08830	UDP-glucoronosyl and UDP-glucosyl transferase, putative, expressed	-	-	-	-	-	GO:0016740//transferase activity;GO:0003824//catalytic activity	GO:0009607//response to biotic stimulus;GO:0050896//response to stimulus;GO:0008152//metabolic process
LOC_Os06g11660	54.3333	256.333	9.95667	50.29	2.33654	5.67895e-12	3.96225e-09	yes	LOC_Os06g11660	phosphate-induced protein 1 conserved region domain containing protein, expressed	-	-	-	-	GO:0005618//cell wall;GO:0044424//intracellular part;GO:0005829//cytosol;GO:0044444//cytoplasmic part;GO:0005622//intracellular;GO:0071944//cell periphery;GO:0044464//cell part;GO:0030312//external encapsulating structure;GO:0005737//cytoplasm;GO:0005575//cellular_component;GO:0005623//cell	GO:0003674//molecular_function	GO:0050896//response to stimulus;GO:0008150//biological_process;GO:0009719//response to endogenous stimulus
LOC_Os06g11830	0	52.8467	0.001	4.14667	12.0177	8.4136e-15	9.71625e-12	yes	LOC_Os06g11830	hAT dimerisation domain-containing protein, putative, expressed	-	-	-	-	-	-	-
LOC_Os06g15170	136.443	43.1733	11.5767	4.37	-1.40551	7.53634e-06	0.00110698	yes	LOC_Os06g15170	3-ketoacyl-CoA synthase, putative, expressed	Metabolism	Lipid metabolism	ko00062//Fatty acid elongation	K15397	GO:0043226//organelle;GO:0005737//cytoplasm;GO:0043229//intracellular organelle;GO:0012505//endomembrane system;GO:0005623//cell;GO:0044464//cell part;GO:0043227//membrane-bounded organelle;GO:0043231//intracellular membrane-bounded organelle;GO:0044424//intracellular part;GO:0044444//cytoplasmic part;GO:0005783//endoplasmic reticulum;GO:0005622//intracellular	GO:0003824//catalytic activity;GO:0016740//transferase activity	GO:0016043//cellular component organization;GO:0044767//single-organism developmental process;GO:0071840//cellular component organization or biogenesis;GO:0007275//multicellular organism development;GO:0071704//organic substance metabolic process;GO:0009987//cellular process;GO:0044707//single-multicellular organism process;GO:0006950//response to stress;GO:0044763//single-organism cellular proce…
LOC_Os06g15760	439.333	158	37.5233	15.48	-1.27738	5.96226e-05	0.00612504	yes	LOC_Os06g15760	eukaryotic aspartyl protease domain containing protein, expressed	-	-	-	-	-	GO:0016787//hydrolase activity;GO:0003824//catalytic activity	GO:0071704//organic substance metabolic process;GO:0019538//protein metabolic process;GO:0008152//metabolic process;GO:0044238//primary metabolic process;GO:0043170//macromolecule metabolic process
LOC_Os06g15910	96	25.6667	7.01	2.16333	-1.69616	1.07567e-05	0.00152001	yes	LOC_Os06g15910	potassium transporter, putative, expressed	-	-	-	-	GO:0016020//membrane	GO:0005215//transporter activity	GO:0006810//transport;GO:0009987//cellular process;GO:0051234//establishment of localization;GO:0051179//localization
LOC_Os06g18670	1128.95	446.71	109.51	50.9867	-1.10287	4.14367e-05	0.00452025	yes	LOC_Os06g18670	anthocyanidin 3-O-glucosyltransferase, putative, expressed	-	-	-	-	GO:0044424//intracellular part;GO:0005622//intracellular;GO:0044464//cell part;GO:0005829//cytosol;GO:0005737//cytoplasm;GO:0044444//cytoplasmic part;GO:0005623//cell	GO:0016740//transferase activity;GO:0003824//catalytic activity	GO:0008152//metabolic process
LOC_Os06g20150	59.3333	105.327	8.27333	16.7333	1.01618	9.72854e-05	0.00897545	yes	LOC_Os06g20150	peroxidase precursor, putative, expressed	Metabolism	Biosynthesis of other secondary metabolites	ko00940//Phenylpropanoid biosynthesis	K00430	GO:0005623//cell;GO:0043231//intracellular membrane-bounded organelle;GO:0005783//endoplasmic reticulum;GO:0044464//cell part;GO:0044444//cytoplasmic part;GO:0005737//cytoplasm;GO:0005622//intracellular;GO:0043227//membrane-bounded organelle;GO:0044424//intracellular part;GO:0012505//endomembrane system;GO:0043226//organelle;GO:0043229//intracellular organelle	GO:0005488//binding;GO:0005515//protein binding;GO:0003824//catalytic activity	GO:0009628//response to abiotic stimulus;GO:0006950//response to stress;GO:0008152//metabolic process;GO:0050896//response to stimulus
LOC_Os06g20790	22.3333	2.33333	2.42	0.256667	-3.23704	6.29692e-07	0.000145437	yes	LOC_Os06g20790	SAM dependent carboxyl methyltransferase, putative, expressed	-	-	-	-	GO:0005622//intracellular;GO:0005623//cell;GO:0044424//intracellular part;GO:0044464//cell part;GO:0005737//cytoplasm	GO:0003824//catalytic activity;GO:0016740//transferase activity	GO:0009719//response to endogenous stimulus;GO:0051716//cellular response to stimulus;GO:0009058//biosynthetic process;GO:0050794//regulation of cellular process;GO:0044763//single-organism cellular process;GO:0006629//lipid metabolic process;GO:0008152//metabolic process;GO:0023052//signaling;GO:0050896//response to stimulus;GO:0044699//single-organism process;GO:0009987//cellular process;GO:004…
LOC_Os06g21210	108.667	7.30667	24.2467	1.91	-3.66614	1.77616e-23	4.95697e-20	yes	LOC_Os06g21210	glycine rich protein family protein, putative, expressed	-	-	-	-	-	-	-
LOC_Os06g28480	10	31	0.84	2.84333	1.75912	3.22872e-05	0.00367789	yes	LOC_Os06g28480	polygalacturonase inhibitor 1 precursor, putative, expressed	-	-	-	-	-	-	GO:0051716//cellular response to stimulus;GO:0050789//regulation of biological process;GO:0044763//single-organism cellular process;GO:0044700//single organism signaling;GO:0044699//single-organism process;GO:0007165//signal transduction;GO:0050794//regulation of cellular process;GO:0065007//biological regulation;GO:0050896//response to stimulus;GO:0007154//cell communication;GO:0023052//signalin…
LOC_Os06g30179	31.6667	64.3333	2.49333	6.18667	1.31109	4.07128e-05	0.00445579	yes	LOC_Os06g30179	cytochrome P450, putative, expressed	-	-	-	-	-	GO:0003824//catalytic activity;GO:0003674//molecular_function;GO:0019825//oxygen binding;GO:0005488//binding	GO:0008152//metabolic process;GO:0050896//response to stimulus;GO:0006950//response to stress;GO:0009628//response to abiotic stimulus
LOC_Os06g32600	23.24	2	5.34	0.463333	-3.52672	3.46071e-06	0.000590936	yes	LOC_Os06g32600	THION15 - Plant thionin family protein precursor, expressed	-	-	-	-	GO:0005623//cell	GO:0005488//binding;GO:0005515//protein binding;GO:0005102//receptor binding	GO:0023052//signaling;GO:0007165//signal transduction;GO:0044699//single-organism process;GO:0009719//response to endogenous stimulus;GO:0051716//cellular response to stimulus;GO:0050789//regulation of biological process;GO:0009987//cellular process;GO:0044700//single organism signaling;GO:0050794//regulation of cellular process;GO:0044763//single-organism cellular process;GO:0065007//biological …
LOC_Os06g33330	139.667	59	12.0667	5.95333	-1.01926	0.000282923	0.0204205	yes	LOC_Os06g33330	powdery mildew resistant protein 5, putative, expressed	-	-	-	-	GO:0005623//cell	-	GO:0008150//biological_process
LOC_Os06g33720	37.3333	8	3.78333	0.963333	-1.97355	1.16379e-05	0.00162398	yes	LOC_Os06g33720	flavin-containing monooxygenase family protein, putative, expressed	-	-	-	-	GO:0005575//cellular_component	GO:1901265//nucleoside phosphate binding;GO:0097159//organic cyclic compound binding;GO:0000166//nucleotide binding;GO:0003824//catalytic activity;GO:0005488//binding;GO:0036094//small molecule binding;GO:1901363//heterocyclic compound binding	GO:0008152//metabolic process
LOC_Os06g35560	54.3333	16.6667	5.09	1.68333	-1.59634	6.9236e-05	0.00694226	yes	LOC_Os06g35560	reticuline oxidase-like protein precursor, putative, expressed	-	-	-	-	GO:0005623//cell	GO:0005488//binding;GO:0003674//molecular_function;GO:0003824//catalytic activity	GO:0008152//metabolic process
LOC_Os06g37224	14.6733	0.666667	1.65	0.07	-4.55897	0.00070013	0.0416472	yes	LOC_Os06g37224	cytochrome P450, putative, expressed	Metabolism	Metabolism of terpenoids and polyketides	ko00904//Diterpenoid biosynthesis	K04122	GO:0005783//endoplasmic reticulum;GO:0009536//plastid;GO:0043226//organelle;GO:0012505//endomembrane system;GO:0043227//membrane-bounded organelle;GO:0005737//cytoplasm;GO:0044464//cell part;GO:0044444//cytoplasmic part;GO:0043231//intracellular membrane-bounded organelle;GO:0016020//membrane;GO:0005623//cell;GO:0005622//intracellular;GO:0044424//intracellular part;GO:0043229//intracellular organ…	GO:0019825//oxygen binding;GO:0005488//binding	GO:0007154//cell communication;GO:0050789//regulation of biological process;GO:0007165//signal transduction;GO:0006629//lipid metabolic process;GO:0044238//primary metabolic process;GO:0050794//regulation of cellular process;GO:0009719//response to endogenous stimulus;GO:0044763//single-organism cellular process;GO:0044700//single organism signaling;GO:0065007//biological regulation;GO:0051716//c…
LOC_Os06g37300	118.66	19.6667	12.4467	2.05333	-2.59972	1.25795e-05	0.00172659	yes	LOC_Os06g37300	cytochrome P450, putative, expressed	Metabolism	Metabolism of terpenoids and polyketides	ko00904//Diterpenoid biosynthesis	K04122	GO:0012505//endomembrane system;GO:0044424//intracellular part;GO:0009536//plastid;GO:0005623//cell;GO:0005622//intracellular;GO:0005737//cytoplasm;GO:0044444//cytoplasmic part;GO:0016020//membrane;GO:0043231//intracellular membrane-bounded organelle;GO:0044464//cell part;GO:0005783//endoplasmic reticulum;GO:0043229//intracellular organelle;GO:0043227//membrane-bounded organelle;GO:0043226//organ…	GO:0019825//oxygen binding;GO:0005488//binding	GO:0050789//regulation of biological process;GO:0023052//signaling;GO:0071704//organic substance metabolic process;GO:0044700//single organism signaling;GO:0050794//regulation of cellular process;GO:0051716//cellular response to stimulus;GO:0009719//response to endogenous stimulus;GO:0006629//lipid metabolic process;GO:0044763//single-organism cellular process;GO:0008152//metabolic process;GO:000…
LOC_Os06g38160	30.6667	3.33333	5.73667	0.7	-3.03479	1.69436e-07	4.61334e-05	yes	LOC_Os06g38160	legume lectins beta domain containing protein, putative, expressed	-	-	-	-	GO:0005623//cell	GO:0003824//catalytic activity;GO:0016301//kinase activity;GO:0016772//transferase activity, transferring phosphorus-containing groups;GO:0030246//carbohydrate binding;GO:0005488//binding;GO:0016740//transferase activity	GO:0044260//cellular macromolecule metabolic process;GO:0043412//macromolecule modification;GO:0006464//cellular protein modification process;GO:0019538//protein metabolic process;GO:0036211//protein modification process;GO:0043170//macromolecule metabolic process;GO:0044267//cellular protein metabolic process;GO:0071704//organic substance metabolic process;GO:0008152//metabolic process;GO:004423…
LOC_Os06g38340	89.3333	430	4.59333	22.47	2.29039	6.3774e-06	0.000953478	yes	LOC_Os06g38340	receptor-like protein kinase precursor, putative, expressed	-	-	-	-	GO:0005623//cell;GO:0005886//plasma membrane;GO:0071944//cell periphery;GO:0016020//membrane;GO:0044464//cell part	GO:0097159//organic cyclic compound binding;GO:0016740//transferase activity;GO:1901363//heterocyclic compound binding;GO:0016301//kinase activity;GO:0036094//small molecule binding;GO:0016772//transferase activity, transferring phosphorus-containing groups;GO:0000166//nucleotide binding;GO:0005488//binding;GO:1901265//nucleoside phosphate binding;GO:0003824//catalytic activity	GO:0023052//signaling;GO:0050789//regulation of biological process;GO:0044267//cellular protein metabolic process;GO:0071704//organic substance metabolic process;GO:0044763//single-organism cellular process;GO:0019538//protein metabolic process;GO:0043412//macromolecule modification;GO:0007154//cell communication;GO:0044238//primary metabolic process;GO:0050896//response to stimulus;GO:0051716//c…
LOC_Os06g38830	30.6667	170.333	2.36	12.6733	2.42494	0.000745486	0.0438006	yes	LOC_Os06g38830	receptor-like protein kinase precursor, putative, expressed	-	-	-	-	GO:0044464//cell part;GO:0005623//cell;GO:0071944//cell periphery;GO:0005886//plasma membrane;GO:0016020//membrane	GO:0016740//transferase activity;GO:0003824//catalytic activity;GO:0016772//transferase activity, transferring phosphorus-containing groups;GO:1901363//heterocyclic compound binding;GO:0000166//nucleotide binding;GO:0036094//small molecule binding;GO:0097159//organic cyclic compound binding;GO:1901265//nucleoside phosphate binding;GO:0005488//binding;GO:0016301//kinase activity	GO:0044260//cellular macromolecule metabolic process;GO:0044267//cellular protein metabolic process;GO:0051716//cellular response to stimulus;GO:0036211//protein modification process;GO:0044238//primary metabolic process;GO:0071704//organic substance metabolic process;GO:0007154//cell communication;GO:0043412//macromolecule modification;GO:0019538//protein metabolic process;GO:0065007//biological…
LOC_Os06g39390	19	0	1.78333	0.001	-10.8004	2.15054e-06	0.000402355	yes	LOC_Os06g39390	transferase family protein, putative, expressed	-	-	-	-	GO:0005575//cellular_component	GO:0003824//catalytic activity;GO:0016740//transferase activity	GO:0008152//metabolic process;GO:0008150//biological_process
LOC_Os06g39624	58.3333	148	3.21667	9.2	1.51607	9.00793e-07	0.000201117	yes	LOC_Os06g39624	transposon protein, putative, Pong sub-class, expressed	-	-	-	-	-	-	-
LOC_Os06g40170	27.9567	72.4667	1.86667	5.15667	1.46597	1.55164e-05	0.00202624	yes	LOC_Os06g40170	phospholipase D, putative, expressed	Cellular Processes;Metabolism	Transport and catabolism;Lipid metabolism	ko00564//Glycerophospholipid metabolism;ko04144//Endocytosis;ko00565//Ether lipid metabolism	K01115	GO:0043227//membrane-bounded organelle;GO:0009536//plastid;GO:0044424//intracellular part;GO:0043226//organelle;GO:0044444//cytoplasmic part;GO:0005737//cytoplasm;GO:0043229//intracellular organelle;GO:0005623//cell;GO:0044464//cell part;GO:0005622//intracellular;GO:0043231//intracellular membrane-bounded organelle	GO:0003824//catalytic activity;GO:0016787//hydrolase activity	GO:0044710//single-organism metabolic process;GO:0044238//primary metabolic process;GO:0071704//organic substance metabolic process;GO:0008152//metabolic process;GO:0044699//single-organism process;GO:0009987//cellular process;GO:0006629//lipid metabolic process
LOC_Os06g40240	2.28667	67.98	0.06	2.47667	5.36729	4.753e-26	1.59178e-22	yes	LOC_Os06g40240	retrotransposon protein, putative, unclassified, expressed	-	-	-	-	-	-	-
LOC_Os06g43090	19.6667	53.3333	2.55	7.52333	1.56087	0.000754955	0.0442792	yes	LOC_Os06g43090	MYB transcription factor TaMYB1, putative, expressed	-	-	-	-	-	GO:0005488//binding;GO:0097159//organic cyclic compound binding;GO:0003676//nucleic acid binding;GO:0005515//protein binding;GO:0003700//transcription factor activity, sequence-specific DNA binding;GO:0003677//DNA binding;GO:0001071//nucleic acid binding transcription factor activity;GO:1901363//heterocyclic compound binding	GO:0050896//response to stimulus;GO:0044237//cellular metabolic process;GO:0009058//biosynthetic process;GO:0046483//heterocycle metabolic process;GO:0044767//single-organism developmental process;GO:0009987//cellular process;GO:0006139//nucleobase-containing compound metabolic process;GO:0044707//single-multicellular organism process;GO:0009791//post-embryonic development;GO:0044699//single-orga…
LOC_Os06g43304	31.3333	0	2.99667	0.001	-11.5491	1.22858e-12	9.14334e-10	yes	LOC_Os06g43304	cytochrome P450, putative, expressed	-	-	-	-	-	GO:0005488//binding;GO:0003824//catalytic activity;GO:0019825//oxygen binding;GO:0005515//protein binding	GO:0006950//response to stress;GO:0044710//single-organism metabolic process;GO:0050896//response to stimulus;GO:0009058//biosynthetic process;GO:0008152//metabolic process;GO:0009987//cellular process;GO:0009607//response to biotic stimulus;GO:0019748//secondary metabolic process;GO:0044699//single-organism process
LOC_Os06g43350	52	6	5.79	0.75	-2.9486	5.15914e-12	3.67616e-09	yes	LOC_Os06g43350	cytochrome P450, putative, expressed	-	-	-	-	GO:0005623//cell	GO:0003824//catalytic activity;GO:0005488//binding;GO:0003674//molecular_function;GO:0019825//oxygen binding	GO:0050896//response to stimulus;GO:0009607//response to biotic stimulus;GO:0008152//metabolic process
LOC_Os06g44610	87	11.6667	13.81	2.21	-2.6436	1.48498e-14	1.65773e-11	yes	LOC_Os06g44610	membrane associated DUF588 domain containing protein, putative, expressed	-	-	-	-	GO:0005575//cellular_component	GO:0003674//molecular_function	GO:0008150//biological_process
LOC_Os06g47550	1227.33	391.667	70.97	27.1867	-1.38431	4.35559e-07	0.000105702	yes	LOC_Os06g47550	cadmium/zinc-transporting ATPase, putative, expressed	-	-	-	-	GO:0044424//intracellular part;GO:0009536//plastid;GO:0005622//intracellular;GO:0043229//intracellular organelle;GO:0043226//organelle;GO:0044464//cell part;GO:0044444//cytoplasmic part;GO:0005737//cytoplasm;GO:0043227//membrane-bounded organelle;GO:0005623//cell;GO:0043231//intracellular membrane-bounded organelle	GO:0003824//catalytic activity;GO:0016787//hydrolase activity;GO:0005215//transporter activity	GO:0051234//establishment of localization;GO:0006807//nitrogen compound metabolic process;GO:0044237//cellular metabolic process;GO:1901360//organic cyclic compound metabolic process;GO:0065008//regulation of biological quality;GO:0006139//nucleobase-containing compound metabolic process;GO:0008152//metabolic process;GO:0071704//organic substance metabolic process;GO:0034641//cellular nitrogen co…
LOC_Os06g47560	16	1	9.05	0.64	-3.82177	4.96301e-05	0.00525985	yes	LOC_Os06g47560	expressed protein	-	-	-	-	GO:0044444//cytoplasmic part;GO:0009536//plastid;GO:0043227//membrane-bounded organelle;GO:0005623//cell;GO:0043226//organelle;GO:0043231//intracellular membrane-bounded organelle;GO:0044424//intracellular part;GO:0005737//cytoplasm;GO:0043229//intracellular organelle;GO:0005622//intracellular;GO:0044464//cell part	GO:0016787//hydrolase activity;GO:0003824//catalytic activity;GO:0005215//transporter activity	GO:0044699//single-organism process;GO:0051234//establishment of localization;GO:0008152//metabolic process;GO:1901360//organic cyclic compound metabolic process;GO:0046483//heterocycle metabolic process;GO:0044237//cellular metabolic process;GO:0006807//nitrogen compound metabolic process;GO:0006725//cellular aromatic compound metabolic process;GO:0009987//cellular process;GO:0042592//homeostati…
LOC_Os06g47910	54	14.3333	5.71667	1.67667	-1.76958	0.000289076	0.0206173	yes	LOC_Os06g47910	GDSL-like lipase/acylhydrolase, putative, expressed	-	-	-	-	GO:0005623//cell;GO:0044464//cell part;GO:0005773//vacuole;GO:0005737//cytoplasm;GO:0043229//intracellular organelle;GO:0044424//intracellular part;GO:0044444//cytoplasmic part;GO:0043226//organelle;GO:0005622//intracellular;GO:0043227//membrane-bounded organelle;GO:0043231//intracellular membrane-bounded organelle	GO:0016787//hydrolase activity;GO:0003824//catalytic activity	GO:0044238//primary metabolic process;GO:0044699//single-organism process;GO:0006629//lipid metabolic process;GO:0008152//metabolic process;GO:0044710//single-organism metabolic process;GO:0071704//organic substance metabolic process
LOC_Os06g48180	39.6667	94.3333	5.98	15.7133	1.39377	0.000617516	0.0377022	yes	LOC_Os06g48180	glycosyl hydrolases family 16, putative, expressed	-	-	-	-	GO:0044464//cell part;GO:0071944//cell periphery;GO:0030312//external encapsulating structure;GO:0005623//cell;GO:0005618//cell wall	GO:0016740//transferase activity;GO:0003824//catalytic activity;GO:0016787//hydrolase activity	GO:0009987//cellular process;GO:0044238//primary metabolic process;GO:0008152//metabolic process;GO:0071704//organic substance metabolic process;GO:0005975//carbohydrate metabolic process
LOC_Os06g48200	178	560.997	23.5433	86.07	1.87019	7.95176e-13	6.05238e-10	yes	LOC_Os06g48200	glycosyl hydrolases family 16, putative, expressed	-	-	-	-	GO:0044464//cell part;GO:0005623//cell;GO:0005576//extracellular region;GO:0030312//external encapsulating structure;GO:0071944//cell periphery;GO:0005618//cell wall	GO:0016740//transferase activity;GO:0003824//catalytic activity;GO:0016787//hydrolase activity	GO:0009987//cellular process;GO:0008152//metabolic process
LOC_Os06g49660	34.3333	2.66667	3.54333	0.336667	-3.39571	5.15966e-11	2.97926e-08	yes	LOC_Os06g49660	transferase family protein, putative, expressed	-	-	-	-	GO:0005575//cellular_component	GO:0016740//transferase activity;GO:0003824//catalytic activity	GO:0008150//biological_process;GO:0008152//metabolic process
LOC_Os06g50490	60.5167	12.0433	6.00333	1.17333	-2.35515	0.000235471	0.0178012	yes	LOC_Os06g50490	expressed protein	-	-	-	-	-	-	-
LOC_Os06g50539	384.667	681.95	38.3067	78.0467	1.02674	5.71096e-06	0.000869364	yes	LOC_Os06g50539	expressed protein	-	-	-	-	-	-	-
LOC_Os07g01890	26.6667	117.667	2.39667	11.7567	2.29438	6.33935e-14	6.24426e-11	yes	LOC_Os07g01890	expressed protein	-	-	-	-	-	-	-
LOC_Os07g02120	52.1867	15.77	5.54667	1.96	-1.50077	1.45978e-05	0.00193234	yes	LOC_Os07g02120	flavin-containing monooxygenase family protein, putative, expressed	-	-	-	-	GO:0005575//cellular_component	GO:0005488//binding;GO:1901265//nucleoside phosphate binding;GO:0000166//nucleotide binding;GO:1901363//heterocyclic compound binding;GO:0003824//catalytic activity;GO:0097159//organic cyclic compound binding;GO:0036094//small molecule binding	GO:0008152//metabolic process
LOC_Os07g02140	73.3333	23.3333	8.21	3.01	-1.44762	5.56771e-06	0.000852944	yes	LOC_Os07g02140	flavin-containing monooxygenase family protein, putative, expressed	-	-	-	-	GO:0005575//cellular_component	GO:1901265//nucleoside phosphate binding;GO:0005488//binding;GO:0000166//nucleotide binding;GO:0003824//catalytic activity;GO:0097159//organic cyclic compound binding;GO:0036094//small molecule binding;GO:1901363//heterocyclic compound binding	GO:0008152//metabolic process
LOC_Os07g03880	59.3333	19.6667	5.06333	1.87667	-1.43192	0.000142032	0.0118031	yes	LOC_Os07g03880	lectin-like receptor kinase, putative, expressed	-	-	-	-	GO:0016020//membrane;GO:0071944//cell periphery;GO:0044464//cell part;GO:0005886//plasma membrane;GO:0005623//cell	GO:0016301//kinase activity;GO:0016772//transferase activity, transferring phosphorus-containing groups;GO:0016740//transferase activity;GO:0003824//catalytic activity	GO:0008152//metabolic process;GO:0009987//cellular process;GO:0008150//biological_process
LOC_Os07g03890	30.6667	7.33333	1.45	0.376667	-1.94469	0.000447135	0.0287419	yes	LOC_Os07g03890	lectin-like receptor kinase 7, putative, expressed	-	-	-	-	GO:0005886//plasma membrane;GO:0016020//membrane;GO:0005623//cell;GO:0044464//cell part;GO:0071944//cell periphery	GO:0003824//catalytic activity;GO:0016772//transferase activity, transferring phosphorus-containing groups;GO:0016740//transferase activity;GO:0016301//kinase activity	GO:0009987//cellular process;GO:0008150//biological_process;GO:0008152//metabolic process
LOC_Os07g05360	44	209.333	3.83667	20.98	2.45109	1.85345e-16	2.69878e-13	yes	LOC_Os07g05360	photosystem II 10 kDa polypeptide, chloroplast precursor, putative, expressed	Metabolism	Energy metabolism	ko00195//Photosynthesis	K03541	GO:0009536//plastid;GO:0043226//organelle;GO:0009579//thylakoid;GO:0005623//cell;GO:0005737//cytoplasm;GO:0005622//intracellular;GO:0016020//membrane;GO:0043229//intracellular organelle;GO:0044424//intracellular part;GO:0043231//intracellular membrane-bounded organelle;GO:0044444//cytoplasmic part;GO:0043227//membrane-bounded organelle;GO:0044464//cell part	GO:0003674//molecular_function	GO:0016043//cellular component organization;GO:0008152//metabolic process;GO:0071840//cellular component organization or biogenesis;GO:0015979//photosynthesis;GO:0006091//generation of precursor metabolites and energy;GO:0009987//cellular process;GO:0044237//cellular metabolic process
LOC_Os07g09710	15.3333	3	1.26667	0.303333	-2.06206	0.000557648	0.0346486	yes	LOC_Os07g09710	OsFBX220 - F-box domain containing protein, expressed	-	-	-	-	-	-	-
LOC_Os07g11739	18.3333	1	2.06333	0.11	-4.2294	0.000306799	0.0215402	yes	LOC_Os07g11739	cytochrome P450, putative, expressed	-	-	-	-	GO:0005623//cell	GO:0005488//binding;GO:0003824//catalytic activity;GO:0019825//oxygen binding;GO:0003674//molecular_function	GO:0008152//metabolic process
LOC_Os07g13634	53.6667	9.66667	4.97333	1.07667	-2.20764	7.87532e-09	2.86679e-06	yes	LOC_Os07g13634	cytokinin-N-glucosyltransferase 1, putative, expressed	-	-	-	-	GO:0005623//cell	GO:0016740//transferase activity;GO:0003824//catalytic activity	GO:0008152//metabolic process;GO:0050896//response to stimulus;GO:0006950//response to stress;GO:0009607//response to biotic stimulus
LOC_Os07g15940	30.3333	5	2.41333	0.43	-2.48862	1.10967e-06	0.000230824	yes	LOC_Os07g15940	legume lectins beta domain containing protein, expressed	-	-	-	-	GO:0071944//cell periphery;GO:0005623//cell;GO:0016020//membrane;GO:0005886//plasma membrane;GO:0044464//cell part	GO:0016740//transferase activity;GO:0016772//transferase activity, transferring phosphorus-containing groups;GO:0003824//catalytic activity;GO:0016301//kinase activity	GO:0009987//cellular process;GO:0008152//metabolic process;GO:0008150//biological_process
LOC_Os07g15970	72.6567	11.49	12.77	2.3	-2.47305	1.11527e-11	7.04726e-09	yes	LOC_Os07g15970	erythronate-4-phosphate dehydrogenase domain containing protein, expressed	-	-	-	-	-	GO:1901265//nucleoside phosphate binding;GO:0097159//organic cyclic compound binding;GO:0036094//small molecule binding;GO:0003824//catalytic activity;GO:1901363//heterocyclic compound binding;GO:0005488//binding;GO:0000166//nucleotide binding	GO:0009058//biosynthetic process;GO:0008152//metabolic process;GO:0009987//cellular process
LOC_Os07g17970	22	2	2.02	0.213333	-3.24317	2.12406e-07	5.60118e-05	yes	LOC_Os07g17970	AMP-binding domain containing protein, expressed	-	-	-	-	GO:0005623//cell;GO:0044444//cytoplasmic part;GO:0005737//cytoplasm;GO:0044424//intracellular part;GO:0005777//peroxisome;GO:0042579//microbody;GO:0043231//intracellular membrane-bounded organelle;GO:0043229//intracellular organelle;GO:0005622//intracellular;GO:0044464//cell part;GO:0043226//organelle;GO:0043227//membrane-bounded organelle	GO:0003824//catalytic activity;GO:0016740//transferase activity	GO:0009987//cellular process;GO:0009058//biosynthetic process;GO:0044710//single-organism metabolic process;GO:0071704//organic substance metabolic process;GO:0044699//single-organism process;GO:0044238//primary metabolic process;GO:0008152//metabolic process;GO:0006629//lipid metabolic process
LOC_Os07g18154	112.313	15.6167	6.48	1.04333	-2.63479	7.90462e-12	5.29451e-09	yes	LOC_Os07g18154	aldehyde oxidase 4, putative, expressed	Metabolism	Metabolism of terpenoids and polyketides	ko00906//Carotenoid biosynthesis	K09842	-	GO:0003824//catalytic activity	GO:0009987//cellular process;GO:0008152//metabolic process;GO:0009058//biosynthetic process
LOC_Os07g18158	72.03	8.00333	12.74	1.69333	-2.91143	2.0299e-10	1.04587e-07	yes	LOC_Os07g18158	aldehyde oxidase, putative, expressed	Metabolism	Metabolism of terpenoids and polyketides	ko00906//Carotenoid biosynthesis	K09842	GO:0005622//intracellular;GO:0005829//cytosol;GO:0044464//cell part;GO:0005737//cytoplasm;GO:0044444//cytoplasmic part;GO:0044424//intracellular part;GO:0005623//cell	GO:0005488//binding;GO:0003824//catalytic activity;GO:0005515//protein binding	GO:0009058//biosynthetic process;GO:0008152//metabolic process;GO:0044238//primary metabolic process;GO:0006629//lipid metabolic process;GO:0071704//organic substance metabolic process;GO:0044699//single-organism process;GO:0044710//single-organism metabolic process;GO:0009987//cellular process
LOC_Os07g18162	22.3333	2.66667	3.10667	0.423333	-2.8755	0.000315026	0.0219796	yes	LOC_Os07g18162	aldehyde oxidase, putative, expressed	Metabolism	Metabolism of terpenoids and polyketides	ko00906//Carotenoid biosynthesis	K09842	GO:0005622//intracellular;GO:0044444//cytoplasmic part;GO:0005737//cytoplasm;GO:0044424//intracellular part;GO:0005623//cell;GO:0044464//cell part;GO:0005829//cytosol	GO:0003824//catalytic activity	GO:0009058//biosynthetic process;GO:0006629//lipid metabolic process;GO:0008152//metabolic process;GO:0071704//organic substance metabolic process;GO:0044710//single-organism metabolic process;GO:0009987//cellular process;GO:0019748//secondary metabolic process;GO:0044699//single-organism process;GO:0005975//carbohydrate metabolic process;GO:0044238//primary metabolic process
LOC_Os07g18240	34	8	2.95	0.743333	-1.98863	0.00038622	0.0257147	yes	LOC_Os07g18240	lectin-like receptor kinase, putative, expressed	-	-	-	-	GO:0071944//cell periphery;GO:0005886//plasma membrane;GO:0016020//membrane;GO:0005623//cell;GO:0044464//cell part	GO:0016301//kinase activity;GO:0016740//transferase activity;GO:0003824//catalytic activity;GO:0016772//transferase activity, transferring phosphorus-containing groups	GO:0008152//metabolic process;GO:0009987//cellular process;GO:0008150//biological_process
LOC_Os07g18874	31	4	2.23667	0.33	-2.76081	1.0603e-07	3.00926e-05	yes	LOC_Os07g18874	white-brown complex homolog protein 11, putative, expressed	-	-	-	-	GO:0016020//membrane;GO:0071944//cell periphery;GO:0005623//cell;GO:0005886//plasma membrane;GO:0044464//cell part	GO:0016787//hydrolase activity;GO:0005215//transporter activity;GO:0003824//catalytic activity	GO:1901360//organic cyclic compound metabolic process;GO:0034641//cellular nitrogen compound metabolic process;GO:0051234//establishment of localization;GO:0046483//heterocycle metabolic process;GO:0006810//transport;GO:0006807//nitrogen compound metabolic process;GO:0051179//localization;GO:0006139//nucleobase-containing compound metabolic process;GO:0009987//cellular process;GO:0006725//cellula…
LOC_Os07g18990	95.3333	32.3333	19.9767	7.65333	-1.38416	1.44315e-05	0.0019179	yes	LOC_Os07g18990	LTPL40 - Protease inhibitor/seed storage/LTP family protein precursor, expressed	-	-	-	-	GO:0005623//cell	GO:0008289//lipid binding;GO:0005215//transporter activity;GO:0005488//binding	GO:0007154//cell communication;GO:0006810//transport;GO:0065007//biological regulation;GO:0044700//single organism signaling;GO:0050794//regulation of cellular process;GO:0009607//response to biotic stimulus;GO:0051234//establishment of localization;GO:0007165//signal transduction;GO:0051716//cellular response to stimulus;GO:0051179//localization;GO:0023052//signaling;GO:0044699//single-organism …
LOC_Os07g19370	0	8.01	0.001	0.36	8.49185	0.000804587	0.0466995	yes	LOC_Os07g19370	retrotransposon protein, putative, Ty3-gypsy subclass, expressed	-	-	-	-	-	-	-
LOC_Os07g24992	21.5633	154.097	9.07667	74.4833	3.03668	9.51386e-07	0.000205561	yes	LOC_Os07g24992	uncharacterized protein ycf68, putative	-	-	-	-	-	-	-
LOC_Os07g28340	7.58667	31.9333	3.16	13.7467	2.12109	2.86729e-06	0.000497542	yes	LOC_Os07g28340	transposon protein, putative, unclassified, expressed	-	-	-	-	-	-	-
LOC_Os07g29750	25.5	56.2533	2.75333	6.86	1.31703	0.000337135	0.0229952	yes	LOC_Os07g29750	glycosyl hydrolases family 16, putative, expressed	-	-	-	-	GO:0030312//external encapsulating structure;GO:0071944//cell periphery;GO:0044464//cell part;GO:0005618//cell wall;GO:0005623//cell;GO:0005576//extracellular region	GO:0016787//hydrolase activity;GO:0003824//catalytic activity;GO:0016740//transferase activity	GO:0005975//carbohydrate metabolic process;GO:0071704//organic substance metabolic process;GO:0008152//metabolic process;GO:0009987//cellular process;GO:0044238//primary metabolic process
LOC_Os07g30760	17.98	3.12333	1.81333	0.346667	-2.38702	0.000122754	0.0106228	yes	LOC_Os07g30760	UDP-glucoronosyl and UDP-glucosyl transferase domain containing protein, expressed	-	-	-	-	-	GO:0003824//catalytic activity;GO:0016740//transferase activity	GO:0008152//metabolic process
LOC_Os07g31720	684.333	182	130.55	37.47	-1.80079	3.89969e-08	1.26797e-05	yes	LOC_Os07g31720	GTPase activating protein, putative, expressed	-	-	-	-	GO:0005575//cellular_component	GO:0003674//molecular_function	GO:0009606//tropism;GO:0050896//response to stimulus;GO:0009605//response to external stimulus;GO:0009628//response to abiotic stimulus
LOC_Os07g32680	0	6.66667	0.001	0.953333	9.89684	1.7552e-05	0.00226084	yes	LOC_Os07g32680	retrotransposon protein, putative, unclassified, expressed	-	-	-	-	-	-	-
LOC_Os07g32710	0.333333	102	0.03	15.01	8.96675	2.27034e-40	2.0589e-36	yes	LOC_Os07g32710	retrotransposon protein, putative, unclassified, expressed	-	-	-	-	-	-	-
LOC_Os07g33910	59.4333	158.817	4.51	13.91	1.62492	2.89276e-11	1.69962e-08	yes	LOC_Os07g33910	transporter family protein, putative, expressed	-	-	-	-	GO:0043227//membrane-bounded organelle;GO:0005773//vacuole;GO:0043226//organelle;GO:0044424//intracellular part;GO:0005622//intracellular;GO:0005623//cell;GO:0044444//cytoplasmic part;GO:0005737//cytoplasm;GO:0043229//intracellular organelle;GO:0016020//membrane;GO:0044464//cell part;GO:0043231//intracellular membrane-bounded organelle	GO:0005215//transporter activity	GO:0009987//cellular process;GO:0008150//biological_process;GO:0051179//localization;GO:0050896//response to stimulus;GO:0008152//metabolic process;GO:0009607//response to biotic stimulus;GO:0015979//photosynthesis;GO:0009628//response to abiotic stimulus;GO:0044237//cellular metabolic process;GO:0051234//establishment of localization;GO:0006810//transport
LOC_Os07g34520	43.6667	8.33333	3.30667	0.706667	-2.22628	1.50988e-05	0.00198298	yes	LOC_Os07g34520	isocitrate lyase, putative, expressed	Metabolism	Global and Overview;Carbohydrate metabolism	ko01200//Carbon metabolism;ko00630//Glyoxylate and dicarboxylate metabolism	K01637	GO:0005575//cellular_component	GO:0003824//catalytic activity;GO:0005515//protein binding;GO:0005488//binding	GO:0008152//metabolic process;GO:0009987//cellular process
LOC_Os07g35480	41.3333	280.667	3.60667	25.34	2.81268	1.37943e-05	0.00186278	yes	LOC_Os07g35480	glucan endo-1,3-beta-glucosidase precursor, putative, expressed	-	-	-	-	-	GO:0003824//catalytic activity;GO:0016787//hydrolase activity;GO:0005488//binding	GO:0005975//carbohydrate metabolic process;GO:0008152//metabolic process;GO:0071704//organic substance metabolic process;GO:0044238//primary metabolic process
LOC_Os07g35940	43.87	3.31333	5.34667	0.446667	-3.58137	3.11503e-09	1.27222e-06	yes	LOC_Os07g35940	beta-amylase, putative, expressed	Metabolism	Carbohydrate metabolism	ko00500//Starch and sucrose metabolism	K01177	GO:0005829//cytosol;GO:0005622//intracellular;GO:0005737//cytoplasm;GO:0044464//cell part;GO:0005623//cell;GO:0044424//intracellular part;GO:0044444//cytoplasmic part	GO:0016787//hydrolase activity;GO:0003824//catalytic activity	GO:0009607//response to biotic stimulus;GO:0009987//cellular process;GO:0044238//primary metabolic process;GO:0009056//catabolic process;GO:0005975//carbohydrate metabolic process;GO:0008152//metabolic process;GO:0050896//response to stimulus;GO:0071704//organic substance metabolic process
LOC_Os07g38130	13.3333	194.667	1.65333	27.29	4.04492	6.65832e-23	1.71529e-19	yes	LOC_Os07g38130	polygalacturonase inhibitor 1 precursor, putative, expressed	-	-	-	-	GO:0005618//cell wall;GO:0005575//cellular_component;GO:0044464//cell part;GO:0005623//cell;GO:0071944//cell periphery;GO:0030312//external encapsulating structure	GO:0030234//enzyme regulator activity;GO:0098772//molecular function regulator	GO:0050789//regulation of biological process;GO:0008152//metabolic process;GO:0044763//single-organism cellular process;GO:0023052//signaling;GO:0050794//regulation of cellular process;GO:0051716//cellular response to stimulus;GO:0007154//cell communication;GO:0044699//single-organism process;GO:0044700//single organism signaling;GO:0009987//cellular process;GO:0065007//biological regulation;GO:0…
LOC_Os07g39350	527	1045.33	41.58	88.8667	1.09575	0.000202729	0.0159376	yes	LOC_Os07g39350	transporter family protein, putative, expressed	-	-	-	-	GO:0005886//plasma membrane;GO:0044464//cell part;GO:0016020//membrane;GO:0071944//cell periphery;GO:0005623//cell	GO:0005215//transporter activity	GO:0006810//transport;GO:0051179//localization;GO:0051234//establishment of localization;GO:0009987//cellular process
LOC_Os07g43820	1.66667	15.3333	0.243333	2.54	3.38382	1.47821e-05	0.00194903	yes	LOC_Os07g43820	glycosyl hydrolase, putative, expressed	Metabolism	Carbohydrate metabolism	ko00520//Amino sugar and nucleotide sugar metabolism	K01183	GO:0005623//cell	GO:0005488//binding;GO:0003824//catalytic activity;GO:0016787//hydrolase activity	GO:0007154//cell communication;GO:0009987//cellular process;GO:0009605//response to external stimulus;GO:0008152//metabolic process;GO:0009628//response to abiotic stimulus;GO:0009991//response to extracellular stimulus;GO:0044699//single-organism process;GO:0044763//single-organism cellular process;GO:0050896//response to stimulus;GO:0006950//response to stress
LOC_Os07g44440	60.3333	15.3333	16.24	4.90333	-1.72772	5.38997e-05	0.00560591	yes	LOC_Os07g44440	peroxiredoxin, putative, expressed	Metabolism	Biosynthesis of other secondary metabolites	ko00940//Phenylpropanoid biosynthesis	K11188	GO:0005575//cellular_component	GO:0003674//molecular_function;GO:0003824//catalytic activity	GO:0044707//single-multicellular organism process;GO:0000003//reproduction;GO:0032502//developmental process;GO:0050896//response to stimulus;GO:0007275//multicellular organism development;GO:0044699//single-organism process;GO:0009791//post-embryonic development;GO:0044767//single-organism developmental process;GO:0008152//metabolic process;GO:0006950//response to stress;GO:0032501//multicellula…
LOC_Os07g44830	1	11.6667	0.07	1.07667	3.94307	1.80937e-06	0.00034235	yes	LOC_Os07g44830	proline-rich family protein, putative, expressed	-	-	-	-	GO:0005575//cellular_component	GO:0003674//molecular_function	GO:0008150//biological_process
LOC_Os07g46670	343.333	848.333	33.54	95.4067	1.50821	7.01784e-10	3.0523e-07	yes	LOC_Os07g46670	early response to dehydration 15, putative, expressed	-	-	-	-	GO:0005737//cytoplasm;GO:0005623//cell;GO:0044424//intracellular part;GO:0005622//intracellular;GO:0044464//cell part	GO:0005488//binding;GO:0005515//protein binding	GO:0050896//response to stimulus;GO:0009628//response to abiotic stimulus;GO:0006950//response to stress;GO:0009607//response to biotic stimulus
LOC_Os07g46846	47.7433	5.46	5.76	0.666667	-3.11103	2.32422e-07	6.08111e-05	yes	LOC_Os07g46846	sex determination protein tasselseed-2, putative, expressed	-	-	-	-	GO:0005575//cellular_component	GO:0005488//binding;GO:0003824//catalytic activity	GO:0008152//metabolic process
LOC_Os07g47680	0.0433333	6.9	0.0166667	2.45333	7.20163	1.43602e-05	0.00191603	yes	LOC_Os07g47680	transposon protein, putative, Pong sub-class, expressed	-	-	-	-	-	-	-
LOC_Os07g47990	50.68	117.397	6.07	16.1467	1.41147	1.84922e-05	0.00234585	yes	LOC_Os07g47990	peroxidase precursor, putative, expressed	Metabolism	Biosynthesis of other secondary metabolites	ko00940//Phenylpropanoid biosynthesis	K00430	GO:0030312//external encapsulating structure;GO:0005829//cytosol;GO:0005576//extracellular region;GO:0005737//cytoplasm;GO:0071944//cell periphery;GO:0005622//intracellular;GO:0044444//cytoplasmic part;GO:0044424//intracellular part;GO:0005623//cell;GO:0044464//cell part;GO:0005618//cell wall	GO:0005488//binding;GO:0005515//protein binding;GO:0003824//catalytic activity	GO:0008152//metabolic process;GO:0050896//response to stimulus;GO:0006950//response to stress
LOC_Os07g48170	129.333	20	6.41	1.11	-2.52976	4.48737e-07	0.000107344	yes	LOC_Os07g48170	nucleotidyltransferase, putative, expressed	-	-	-	-	-	GO:0003674//molecular_function	GO:0008150//biological_process
LOC_Os07g48280	375.193	968.23	25.84	77.16	1.57825	1.87983e-10	9.83681e-08	yes	LOC_Os07g48280	expressed protein	-	-	-	-	-	GO:0005515//protein binding;GO:0005488//binding;GO:0003674//molecular_function	GO:0008150//biological_process
LOC_Os07g48750	15.3333	36	0.853333	2.27667	1.41574	0.00028152	0.0204072	yes	LOC_Os07g48750	alpha-N-arabinofuranosidase, putative, expressed	Metabolism	Carbohydrate metabolism	ko00520//Amino sugar and nucleotide sugar metabolism	K01209	GO:0043226//organelle;GO:0005623//cell;GO:0005622//intracellular;GO:0005773//vacuole;GO:0005576//extracellular region;GO:0005737//cytoplasm;GO:0005618//cell wall;GO:0044444//cytoplasmic part;GO:0044464//cell part;GO:0043231//intracellular membrane-bounded organelle;GO:0043229//intracellular organelle;GO:0030312//external encapsulating structure;GO:0044424//intracellular part;GO:0043227//membrane-…	GO:0003824//catalytic activity;GO:0016787//hydrolase activity	GO:0071704//organic substance metabolic process;GO:0044238//primary metabolic process;GO:0008152//metabolic process;GO:0005975//carbohydrate metabolic process
LOC_Os07g48770	91.6667	16.6667	13.6767	3.02667	-2.17591	3.69612e-07	9.10169e-05	yes	LOC_Os07g48770	serine hydrolase domain containing protein, expressed	Organismal Systems;Environmental Information Processing	Signal transduction;Environmental adaptation	ko04626//Plant-pathogen interaction;ko04070//Phosphatidylinositol signaling system	K02183	-	-	GO:0009987//cellular process;GO:0009058//biosynthetic process;GO:0008152//metabolic process
LOC_Os08g01330	52	108.667	5.15	12.1567	1.2391	2.09726e-06	0.000394591	yes	LOC_Os08g01330	no apical meristem protein, putative, expressed	-	-	-	-	GO:0044424//intracellular part;GO:0005622//intracellular;GO:0043227//membrane-bounded organelle;GO:0043231//intracellular membrane-bounded organelle;GO:0044464//cell part;GO:0043226//organelle;GO:0005623//cell;GO:0043229//intracellular organelle;GO:0005634//nucleus	GO:0001071//nucleic acid binding transcription factor activity;GO:0003700//transcription factor activity, sequence-specific DNA binding	GO:0007275//multicellular organism development;GO:0006139//nucleobase-containing compound metabolic process;GO:0034641//cellular nitrogen compound metabolic process;GO:0044699//single-organism process;GO:0044237//cellular metabolic process;GO:0071704//organic substance metabolic process;GO:0050896//response to stimulus;GO:0009719//response to endogenous stimulus;GO:1901360//organic cyclic compoun…
LOC_Os08g04500	2534	1169	237.343	117.423	-1.01526	0.000106373	0.00960222	yes	LOC_Os08g04500	terpene synthase, putative, expressed	-	-	-	-	GO:0005575//cellular_component	GO:0003824//catalytic activity	GO:0009607//response to biotic stimulus;GO:0044710//single-organism metabolic process;GO:0050896//response to stimulus;GO:0071704//organic substance metabolic process;GO:0008152//metabolic process;GO:0009987//cellular process;GO:0044238//primary metabolic process;GO:0044699//single-organism process;GO:0006629//lipid metabolic process;GO:0009058//biosynthetic process
LOC_Os08g06100	1615	675.333	181.747	87.81	-1.04947	0.000334802	0.0228827	yes	LOC_Os08g06100	O-methyltransferase, putative, expressed	Metabolism	Biosynthesis of other secondary metabolites	ko00940//Phenylpropanoid biosynthesis	K13066	GO:0005737//cytoplasm;GO:0043231//intracellular membrane-bounded organelle;GO:0043227//membrane-bounded organelle;GO:0044444//cytoplasmic part;GO:0005575//cellular_component;GO:0044464//cell part;GO:0005886//plasma membrane;GO:0005829//cytosol;GO:0005634//nucleus;GO:0005622//intracellular;GO:0071944//cell periphery;GO:0043226//organelle;GO:0043229//intracellular organelle;GO:0016020//membrane;GO:…	GO:0005515//protein binding;GO:0003824//catalytic activity;GO:0016740//transferase activity;GO:0005488//binding	GO:0044699//single-organism process;GO:0009058//biosynthetic process;GO:0008152//metabolic process;GO:0009987//cellular process;GO:0019748//secondary metabolic process;GO:0044710//single-organism metabolic process
LOC_Os08g06380	505.333	1143	26.2233	65.3667	1.3177	2.43009e-06	0.000442304	yes	LOC_Os08g06380	CSLF6 - cellulose synthase-like family F; beta1,3;1,4 glucan synthase, expressed	-	-	-	-	GO:0044444//cytoplasmic part;GO:0005623//cell;GO:0043227//membrane-bounded organelle;GO:0043229//intracellular organelle;GO:0044464//cell part;GO:0044424//intracellular part;GO:0043226//organelle;GO:0043231//intracellular membrane-bounded organelle;GO:0005737//cytoplasm;GO:0005622//intracellular;GO:0012505//endomembrane system;GO:0005794//Golgi apparatus	GO:0016740//transferase activity;GO:0003824//catalytic activity	GO:0006950//response to stress;GO:0044699//single-organism process;GO:0032502//developmental process;GO:0008152//metabolic process;GO:0007275//multicellular organism development;GO:0071704//organic substance metabolic process;GO:0050896//response to stimulus;GO:0044767//single-organism developmental process;GO:0044707//single-multicellular organism process;GO:0044238//primary metabolic process;GO…
LOC_Os08g07380	2.68	12.1733	0.0866667	0.47	2.43911	0.000137408	0.0114472	yes	LOC_Os08g07380	retrotransposon protein, putative, unclassified, expressed	-	-	-	-	-	-	-
LOC_Os08g10080	34.6633	61.9733	4.53667	9.6	1.0814	0.000555462	0.0346414	yes	LOC_Os08g10080	no apical meristem protein, putative, expressed	-	-	-	-	-	GO:0003700//transcription factor activity, sequence-specific DNA binding;GO:0001071//nucleic acid binding transcription factor activity	GO:0065007//biological regulation;GO:0032501//multicellular organismal process;GO:0006807//nitrogen compound metabolic process;GO:0050789//regulation of biological process;GO:0044767//single-organism developmental process;GO:0009058//biosynthetic process;GO:0044763//single-organism cellular process;GO:0044707//single-multicellular organism process;GO:0044700//single organism signaling;GO:0034641/…
LOC_Os08g10630	673	165.667	66.8967	18.63	-1.84431	4.43923e-07	0.000106957	yes	LOC_Os08g10630	metal cation transporter, putative, expressed	-	-	-	-	GO:0016020//membrane;GO:0005623//cell	GO:0005215//transporter activity	GO:0008150//biological_process;GO:0009987//cellular process;GO:0006810//transport;GO:0051179//localization;GO:0051234//establishment of localization
LOC_Os08g11150	0	6.83333	0.001	0.283333	8.14636	0.000205777	0.0161016	yes	LOC_Os08g11150	retrotransposon protein, putative, unclassified, expressed	-	-	-	-	-	-	-
LOC_Os08g11180	0.333333	8.66667	0.0233333	0.633333	4.7625	0.000125617	0.0106875	yes	LOC_Os08g11180	retrotransposon protein, putative, unclassified, expressed	-	-	-	-	-	-	-
LOC_Os08g12470	0.633333	8	0.0266667	0.326667	3.61471	0.000788514	0.0460058	yes	LOC_Os08g12470	retrotransposon protein, putative, Ty3-gypsy subclass, expressed	-	-	-	-	-	-	-
LOC_Os08g12640	0.666667	10.3333	0.0633333	1.04667	4.04669	0.000175755	0.0142865	yes	LOC_Os08g12640	retrotransposon protein, putative, Ty3-gypsy subclass, expressed	-	-	-	-	-	-	-
LOC_Os08g15292	0	9.29	0.001	3.57	11.8017	0.000464465	0.0297987	yes	LOC_Os08g15292	cytochrome b6-f complex subunit 4, putative, expressed	Metabolism	Energy metabolism	ko00195//Photosynthesis	K02637	GO:0005622//intracellular;GO:0005623//cell;GO:0009579//thylakoid;GO:0016020//membrane;GO:0044464//cell part;GO:0043229//intracellular organelle;GO:0043227//membrane-bounded organelle;GO:0043226//organelle;GO:0043231//intracellular membrane-bounded organelle;GO:0009536//plastid;GO:0044424//intracellular part;GO:0044444//cytoplasmic part;GO:0005737//cytoplasm	GO:0003674//molecular_function;GO:0003824//catalytic activity	GO:0015979//photosynthesis;GO:0006091//generation of precursor metabolites and energy;GO:0009987//cellular process;GO:0044237//cellular metabolic process;GO:0008152//metabolic process
LOC_Os08g16260	5.66667	40	0.526667	4.45667	3.081	2.66921e-05	0.00320401	yes	LOC_Os08g16260	cytochrome P450 protein, putative, expressed	-	-	-	-	GO:0005623//cell	GO:0005488//binding;GO:0003674//molecular_function;GO:0019825//oxygen binding;GO:0003824//catalytic activity	GO:0008152//metabolic process
LOC_Os08g23180	227	498	21.2	51.0333	1.26738	0.000103548	0.00942341	yes	LOC_Os08g23180	fasciclin-like arabinogalactan protein 8 precursor, putative, expressed	-	-	-	-	GO:0030312//external encapsulating structure;GO:0005623//cell;GO:0071944//cell periphery;GO:0044464//cell part;GO:0005886//plasma membrane;GO:0016020//membrane;GO:0005618//cell wall	-	-
LOC_Os08g24270	0	6.20333	0.001	0.206667	7.69116	0.000244772	0.0181358	yes	LOC_Os08g24270	retrotransposon protein, putative, Ty3-gypsy subclass, expressed	-	-	-	-	-	-	-
LOC_Os08g26230	124.333	483.333	18.1	65.7867	1.86181	2.35652e-05	0.00287963	yes	LOC_Os08g26230	expressed protein	-	-	-	-	-	-	-
LOC_Os08g26710	311.667	61.6667	30.68	7.23	-2.08523	5.23964e-15	6.26698e-12	yes	LOC_Os08g26710	plant protein of unknown function domain containing protein, expressed	-	-	-	-	GO:0005623//cell	GO:0003674//molecular_function	GO:0008150//biological_process
LOC_Os08g28790	26.3333	1	5.4	0.236667	-4.51203	4.03047e-10	1.98182e-07	yes	LOC_Os08g28790	dirigent, putative, expressed	-	-	-	-	GO:0005623//cell	GO:0003674//molecular_function	GO:0006950//response to stress;GO:0050896//response to stimulus
LOC_Os08g29580	5.66667	19.6667	2.34333	9.67667	2.04595	0.00032342	0.0223327	yes	LOC_Os08g29580	expressed protein	-	-	-	-	-	-	-
LOC_Os08g29760	13.6667	34.3333	0.886667	2.76333	1.63995	2.74066e-05	0.00325478	yes	LOC_Os08g29760	membrane protein, putative, expressed	-	-	-	-	GO:0016020//membrane;GO:0005623//cell	-	-
LOC_Os08g34280	130.333	46	15.3267	6.02333	-1.34741	0.000287727	0.0206116	yes	LOC_Os08g34280	cinnamoyl-CoA reductase, putative, expressed	Metabolism	Biosynthesis of other secondary metabolites	ko00940//Phenylpropanoid biosynthesis	K09753	GO:0005622//intracellular;GO:0005737//cytoplasm;GO:0044464//cell part;GO:0005829//cytosol;GO:0044444//cytoplasmic part;GO:0005623//cell;GO:0044424//intracellular part	GO:0003824//catalytic activity	GO:0006950//response to stress;GO:0019748//secondary metabolic process;GO:0008152//metabolic process;GO:0044699//single-organism process;GO:0009987//cellular process;GO:0009058//biosynthetic process;GO:0044710//single-organism metabolic process;GO:0009628//response to abiotic stimulus;GO:0050896//response to stimulus
LOC_Os08g35760	25.6667	339.667	3.61	56.2733	3.96238	1.08657e-10	5.77605e-08	yes	LOC_Os08g35760	Cupin domain containing protein, expressed	-	-	-	-	GO:0005576//extracellular region	-	GO:0008150//biological_process
LOC_Os08g36500	91.3633	8.61333	5.02333	0.526667	-3.25368	2.85749e-16	3.9874e-13	yes	LOC_Os08g36500	nitrate reductase, putative, expressed	Metabolism	Energy metabolism	ko00910//Nitrogen metabolism	K10534	GO:0044424//intracellular part;GO:0005623//cell;GO:0005622//intracellular;GO:0044444//cytoplasmic part;GO:0005829//cytosol;GO:0005737//cytoplasm;GO:0044464//cell part	GO:0005515//protein binding;GO:0005488//binding;GO:0003824//catalytic activity	GO:0009058//biosynthetic process;GO:0009628//response to abiotic stimulus;GO:0050896//response to stimulus;GO:0008152//metabolic process;GO:0009987//cellular process
LOC_Os08g36760	52	7.33333	3.52	0.56	-2.65208	0.000718599	0.0426106	yes	LOC_Os08g36760	remorin C-terminal domain containing protein, putative, expressed	-	-	-	-	GO:0005623//cell;GO:0005886//plasma membrane;GO:0044464//cell part;GO:0016020//membrane;GO:0071944//cell periphery	GO:0003674//molecular_function	GO:0008150//biological_process
LOC_Os08g37300	16.6667	44.3333	3.84667	12.1467	1.65888	1.76297e-05	0.00226214	yes	LOC_Os08g37300	expressed protein	-	-	-	-	GO:0005623//cell	GO:0003674//molecular_function	GO:0008150//biological_process
LOC_Os08g37660	104.667	451.333	16.22	79.6433	2.29578	2.06125e-09	8.52239e-07	yes	LOC_Os08g37660	plastocyanin-like domain containing protein, putative, expressed	-	-	-	-	GO:0016020//membrane	GO:0003674//molecular_function;GO:0005488//binding	-
LOC_Os08g37670	1288	2343.67	237.21	488.683	1.04274	4.91569e-06	0.000772894	yes	LOC_Os08g37670	plastocyanin-like domain containing protein, putative, expressed	-	-	-	-	GO:0016020//membrane	GO:0003674//molecular_function;GO:0005488//binding	-
LOC_Os08g39550	78.6667	334.667	8.1	41.4333	2.3548	8.42175e-17	1.41022e-13	yes	LOC_Os08g39550	polygalacturonase inhibitor 2 precursor, putative, expressed	-	-	-	-	GO:0005622//intracellular;GO:0043229//intracellular organelle;GO:0043226//organelle;GO:0043227//membrane-bounded organelle;GO:0005737//cytoplasm;GO:0043231//intracellular membrane-bounded organelle;GO:0009536//plastid;GO:0044444//cytoplasmic part;GO:0044424//intracellular part;GO:0044464//cell part;GO:0005623//cell	GO:0097159//organic cyclic compound binding;GO:1901265//nucleoside phosphate binding;GO:0005488//binding;GO:0000166//nucleotide binding;GO:1901363//heterocyclic compound binding;GO:0036094//small molecule binding	GO:0050896//response to stimulus;GO:0044763//single-organism cellular process;GO:0050794//regulation of cellular process;GO:0044700//single organism signaling;GO:0023052//signaling;GO:0007165//signal transduction;GO:0008150//biological_process;GO:0065007//biological regulation;GO:0009628//response to abiotic stimulus;GO:0044699//single-organism process;GO:0050789//regulation of biological process…
LOC_Os08g39840	342.71	685.583	20.0033	42.0967	1.07347	0.000718871	0.0426106	yes	LOC_Os08g39840	lipoxygenase, chloroplast precursor, putative, expressed	Metabolism	Lipid metabolism	ko00592//alpha-Linolenic acid metabolism;ko00591//Linoleic acid metabolism	K00454	GO:0009579//thylakoid;GO:0044444//cytoplasmic part;GO:0016020//membrane;GO:0009536//plastid;GO:0044424//intracellular part;GO:0005623//cell;GO:0043229//intracellular organelle;GO:0005737//cytoplasm;GO:0043231//intracellular membrane-bounded organelle;GO:0005622//intracellular;GO:0043226//organelle;GO:0043227//membrane-bounded organelle;GO:0044464//cell part	GO:0005515//protein binding;GO:0005488//binding;GO:0003824//catalytic activity	GO:0009058//biosynthetic process;GO:0071704//organic substance metabolic process;GO:0044699//single-organism process;GO:0009628//response to abiotic stimulus;GO:0009987//cellular process;GO:0044238//primary metabolic process;GO:0050896//response to stimulus;GO:0006950//response to stress;GO:0044710//single-organism metabolic process;GO:0008152//metabolic process;GO:0006629//lipid metabolic proces…
LOC_Os08g41320	68	145.333	6.69	16.3633	1.29039	2.76747e-07	6.97976e-05	yes	LOC_Os08g41320	BHLH transcription factor, putative, expressed	-	-	-	-	GO:0043226//organelle;GO:0044464//cell part;GO:0005622//intracellular;GO:0005623//cell;GO:0043229//intracellular organelle;GO:0044424//intracellular part;GO:0005634//nucleus;GO:0043231//intracellular membrane-bounded organelle;GO:0043227//membrane-bounded organelle	GO:0003700//transcription factor activity, sequence-specific DNA binding;GO:0001071//nucleic acid binding transcription factor activity	GO:0006807//nitrogen compound metabolic process;GO:0008152//metabolic process;GO:0071704//organic substance metabolic process;GO:0046483//heterocycle metabolic process;GO:0006725//cellular aromatic compound metabolic process;GO:0044238//primary metabolic process;GO:0044237//cellular metabolic process;GO:0034641//cellular nitrogen compound metabolic process;GO:1901360//organic cyclic compound meta…
LOC_Os08g43120	77.6667	3.66667	3.36667	0.176667	-4.25222	1.368e-19	2.69497e-16	yes	LOC_Os08g43120	Plant PDR ABC transporter associated domain containing protein, expressed	-	-	-	-	GO:0016020//membrane	GO:0003824//catalytic activity;GO:0016787//hydrolase activity;GO:0005215//transporter activity	GO:0051179//localization;GO:0044237//cellular metabolic process;GO:0034641//cellular nitrogen compound metabolic process;GO:0006807//nitrogen compound metabolic process;GO:0009056//catabolic process;GO:0008152//metabolic process;GO:0006725//cellular aromatic compound metabolic process;GO:0071704//organic substance metabolic process;GO:0009987//cellular process;GO:0006139//nucleobase-containing co…
LOC_Os08g43400	745.333	88.3333	36.77	5.14667	-2.83682	3.74575e-22	8.96038e-19	yes	LOC_Os08g43400	kinesin motor domain containing protein, expressed	-	-	-	-	-	GO:1901265//nucleoside phosphate binding;GO:1901363//heterocyclic compound binding;GO:0017111//nucleoside-triphosphatase activity;GO:0005488//binding;GO:0016787//hydrolase activity;GO:0016817//hydrolase activity, acting on acid anhydrides;GO:0003824//catalytic activity;GO:0000166//nucleotide binding;GO:0016462//pyrophosphatase activity;GO:0097159//organic cyclic compound binding;GO:0036094//small…	GO:0009987//cellular process;GO:0008152//metabolic process
LOC_Os08g44040	0	7.69667	0.001	0.803333	9.64985	8.64999e-05	0.00818329	yes	LOC_Os08g44040	rhamnogalacturonate lyase, putative, expressed	-	-	-	-	GO:0005575//cellular_component	GO:0003824//catalytic activity	GO:0008150//biological_process;GO:0008152//metabolic process
LOC_Os09g03939	63.2667	17.6667	4.50333	1.43	-1.65498	1.84371e-05	0.00234585	yes	LOC_Os09g03939	white-brown complex homolog protein 11, putative, expressed	-	-	-	-	GO:0071944//cell periphery;GO:0044464//cell part;GO:0005623//cell;GO:0016020//membrane;GO:0005886//plasma membrane	GO:0003824//catalytic activity;GO:0005215//transporter activity;GO:0016787//hydrolase activity	GO:0009056//catabolic process;GO:0044237//cellular metabolic process;GO:1901360//organic cyclic compound metabolic process;GO:0044238//primary metabolic process;GO:0034641//cellular nitrogen compound metabolic process;GO:0046483//heterocycle metabolic process;GO:0051234//establishment of localization;GO:0009987//cellular process;GO:0050896//response to stimulus;GO:0006807//nitrogen compound metab…
LOC_Os09g07350	121.667	227	11.99	25.8467	1.10815	1.33006e-05	0.00181071	yes	LOC_Os09g07350	fasciclin-like arabinogalactan protein 8 precursor, putative, expressed	-	-	-	-	GO:0005737//cytoplasm;GO:0044444//cytoplasmic part;GO:0005622//intracellular;GO:0043229//intracellular organelle;GO:0043231//intracellular membrane-bounded organelle;GO:0043227//membrane-bounded organelle;GO:0071944//cell periphery;GO:0016020//membrane;GO:0005773//vacuole;GO:0043226//organelle;GO:0044464//cell part;GO:0044424//intracellular part;GO:0005623//cell;GO:0005886//plasma membrane	-	GO:0008150//biological_process
LOC_Os09g09040	0	7.39333	0.001	2.39	11.2228	8.49597e-05	0.00806034	yes	LOC_Os09g09040	expressed protein	-	-	-	-	-	-	-
LOC_Os09g10010	49.6667	16.6667	15.0467	5.36333	-1.48824	0.000578403	0.0356735	yes	LOC_Os09g10010	expressed protein	-	-	-	-	-	-	-
LOC_Os09g10840	29.3333	7	2.45667	0.686667	-1.83902	2.87478e-05	0.00336631	yes	LOC_Os09g10840	transcription factor, putative, expressed	Environmental Information Processing	Signal transduction	ko04075//Plant hormone signal transduction	K14431	-	GO:1901363//heterocyclic compound binding;GO:0003677//DNA binding;GO:0005488//binding;GO:0003676//nucleic acid binding;GO:0097159//organic cyclic compound binding;GO:0001071//nucleic acid binding transcription factor activity;GO:0003700//transcription factor activity, sequence-specific DNA binding	GO:0050794//regulation of cellular process;GO:0044763//single-organism cellular process;GO:0044267//cellular protein metabolic process;GO:0006807//nitrogen compound metabolic process;GO:0007154//cell communication;GO:0044699//single-organism process;GO:0034641//cellular nitrogen compound metabolic process;GO:0008152//metabolic process;GO:0044260//cellular macromolecule metabolic process;GO:000613…
LOC_Os09g13650	221.333	23	32.24	4.20333	-2.93925	9.01034e-05	0.0084763	yes	LOC_Os09g13650	microtubule-associated protein, putative, expressed	-	-	-	-	GO:0005575//cellular_component	GO:0003674//molecular_function	GO:0008150//biological_process
LOC_Os09g16950	101	333.667	8.71333	30.2233	1.79437	1.78926e-05	0.00228711	yes	LOC_Os09g16950	cysteine-rich receptor-like protein kinase 25 precursor, putative, expressed	-	-	-	-	GO:0005623//cell	GO:0016740//transferase activity;GO:0003824//catalytic activity;GO:0016772//transferase activity, transferring phosphorus-containing groups;GO:0016301//kinase activity	GO:0044260//cellular macromolecule metabolic process;GO:0043412//macromolecule modification;GO:0019538//protein metabolic process;GO:0036211//protein modification process;GO:0044267//cellular protein metabolic process;GO:0044237//cellular metabolic process;GO:0043170//macromolecule metabolic process;GO:0006464//cellular protein modification process;GO:0008152//metabolic process;GO:0009987//cellul…
LOC_Os09g18230	105.667	31	7.31	2.56	-1.51373	0.000107764	0.00967566	yes	LOC_Os09g18230	expressed protein	-	-	-	-	GO:0005623//cell	GO:0016740//transferase activity;GO:0016772//transferase activity, transferring phosphorus-containing groups;GO:0003824//catalytic activity;GO:0016301//kinase activity	GO:0036211//protein modification process;GO:0071704//organic substance metabolic process;GO:0044260//cellular macromolecule metabolic process;GO:0044238//primary metabolic process;GO:0008152//metabolic process;GO:0006464//cellular protein modification process;GO:0019538//protein metabolic process;GO:0044237//cellular metabolic process;GO:0043412//macromolecule modification;GO:0043170//macromolecu…
LOC_Os09g18360	33	66.6667	1.96333	4.30333	1.13215	0.0007288	0.0430467	yes	LOC_Os09g18360	expressed protein	-	-	-	-	GO:0005623//cell	GO:0016301//kinase activity;GO:0016740//transferase activity;GO:0016772//transferase activity, transferring phosphorus-containing groups;GO:0003824//catalytic activity	GO:0044267//cellular protein metabolic process;GO:0044237//cellular metabolic process;GO:0006464//cellular protein modification process;GO:0044260//cellular macromolecule metabolic process;GO:0043170//macromolecule metabolic process;GO:0043412//macromolecule modification;GO:0044238//primary metabolic process;GO:0019538//protein metabolic process;GO:0008152//metabolic process;GO:0071704//organic s…
LOC_Os09g20980	11.3333	1	1.10333	0.106667	-3.37069	0.000180376	0.0145913	yes	LOC_Os09g20980	RING-H2 finger protein, putative, expressed	-	-	-	-	-	GO:0005488//binding	-
LOC_Os09g24590	10.6667	41.3333	1.77333	8.84667	2.31867	1.26152e-06	0.000252983	yes	LOC_Os09g24590	expressed protein	-	-	-	-	-	-	-
LOC_Os09g25610	47	7.66667	6.10667	1.32	-2.20985	7.12512e-05	0.00712299	yes	LOC_Os09g25610	class I glutamine amidotransferase, putative, expressed	-	-	-	-	GO:0005737//cytoplasm;GO:0005622//intracellular;GO:0044424//intracellular part;GO:0044444//cytoplasmic part;GO:0005623//cell;GO:0005829//cytosol;GO:0044464//cell part	GO:0016787//hydrolase activity;GO:0003824//catalytic activity	GO:0044699//single-organism process;GO:0071704//organic substance metabolic process;GO:0044238//primary metabolic process;GO:0005975//carbohydrate metabolic process;GO:0009987//cellular process;GO:0019748//secondary metabolic process;GO:0008152//metabolic process;GO:0044710//single-organism metabolic process
LOC_Os09g25810	30	406.667	3.61333	56.7833	3.97407	4.6765e-29	2.18936e-25	yes	LOC_Os09g25810	nodulin, putative, expressed	-	-	-	-	GO:0016020//membrane	GO:0003674//molecular_function	GO:0008150//biological_process
LOC_Os09g26980	51.6667	15.3333	5.31	1.67667	-1.66312	9.77253e-05	0.00899127	yes	LOC_Os09g26980	cytochrome P450, putative, expressed	-	-	-	-	-	GO:0019825//oxygen binding;GO:0005488//binding;GO:0003824//catalytic activity	GO:0050896//response to stimulus;GO:0009058//biosynthetic process;GO:0008152//metabolic process;GO:0044699//single-organism process;GO:0009987//cellular process;GO:0019748//secondary metabolic process;GO:0009719//response to endogenous stimulus;GO:0044710//single-organism metabolic process;GO:0009628//response to abiotic stimulus
LOC_Os09g27040	76.6667	22	5.39333	1.8	-1.58318	4.5204e-06	0.00071748	yes	LOC_Os09g27040	GEX1, putative, expressed	-	-	-	-	GO:0044464//cell part;GO:0005886//plasma membrane;GO:0016020//membrane;GO:0005623//cell;GO:0071944//cell periphery	GO:0003674//molecular_function	GO:0008150//biological_process
LOC_Os09g27260	20.6667	3.33333	2.83333	0.46	-2.62279	0.000643629	0.0388058	yes	LOC_Os09g27260	plant viral response family protein, putative, expressed	-	-	-	-	GO:0005623//cell	-	GO:0008150//biological_process
LOC_Os09g27750	196.843	368.047	22.5933	50.1667	1.15083	8.77656e-07	0.000197267	yes	LOC_Os09g27750	1-aminocyclopropane-1-carboxylate oxidase 1, putative, expressed	Metabolism	Amino acid metabolism	ko00270//Cysteine and methionine metabolism	K05933	-	GO:0003824//catalytic activity	GO:0050896//response to stimulus;GO:0009058//biosynthetic process;GO:0009987//cellular process;GO:0009607//response to biotic stimulus;GO:0008152//metabolic process
LOC_Os09g27820	32.49	144.953	3.89	20.5533	2.40153	6.47012e-09	2.38115e-06	yes	LOC_Os09g27820	1-aminocyclopropane-1-carboxylate oxidase protein, putative, expressed	Metabolism	Amino acid metabolism	ko00270//Cysteine and methionine metabolism	K05933	-	GO:0003824//catalytic activity	GO:0009607//response to biotic stimulus;GO:0050896//response to stimulus;GO:0009987//cellular process;GO:0009058//biosynthetic process;GO:0008152//metabolic process
LOC_Os09g28210	55.3767	107.373	7.06667	16.7533	1.24535	0.00012565	0.0106875	yes	LOC_Os09g28210	bHelix-loop-helix transcription factor, putative, expressed	-	-	-	-	GO:0043229//intracellular organelle;GO:0005634//nucleus;GO:0043227//membrane-bounded organelle;GO:0005623//cell;GO:0005622//intracellular;GO:0044424//intracellular part;GO:0043231//intracellular membrane-bounded organelle;GO:0044464//cell part;GO:0043226//organelle	GO:0001071//nucleic acid binding transcription factor activity;GO:0003700//transcription factor activity, sequence-specific DNA binding	GO:0071704//organic substance metabolic process;GO:0048367//shoot system development;GO:0048608//reproductive structure development;GO:0009987//cellular process;GO:0006725//cellular aromatic compound metabolic process;GO:1901360//organic cyclic compound metabolic process;GO:0000003//reproduction;GO:0090567//reproductive shoot system development;GO:0034641//cellular nitrogen compound metabolic pro…
LOC_Os09g29600	43.0233	124.867	3.21333	9.84333	1.61508	0.000125735	0.0106875	yes	LOC_Os09g29600	OsWAK85 - OsWAK receptor-like cytoplasmic kinase OsWAK-RLCK, expressed	-	-	-	-	GO:0005886//plasma membrane;GO:0005623//cell;GO:0016020//membrane;GO:0071944//cell periphery;GO:0044464//cell part	GO:0097159//organic cyclic compound binding;GO:1901265//nucleoside phosphate binding;GO:1901363//heterocyclic compound binding;GO:0005488//binding;GO:0036094//small molecule binding;GO:0016301//kinase activity;GO:0016772//transferase activity, transferring phosphorus-containing groups;GO:0003824//catalytic activity;GO:0000166//nucleotide binding;GO:0016740//transferase activity	GO:0043412//macromolecule modification;GO:0036211//protein modification process;GO:0044763//single-organism cellular process;GO:0042592//homeostatic process;GO:0019725//cellular homeostasis;GO:0016043//cellular component organization;GO:0009653//anatomical structure morphogenesis;GO:0065007//biological regulation;GO:0044267//cellular protein metabolic process;GO:0071840//cellular component organi…
LOC_Os09g30510	15	3.33333	1.68333	0.426667	-1.98014	0.000852749	0.0489855	yes	LOC_Os09g30510	glucosyl transferase, putative, expressed	-	-	-	-	GO:0044444//cytoplasmic part;GO:0044464//cell part;GO:0005623//cell;GO:0005829//cytosol;GO:0005622//intracellular;GO:0044424//intracellular part;GO:0005737//cytoplasm	GO:0016740//transferase activity;GO:0003824//catalytic activity	GO:0008152//metabolic process
LOC_Os09g31130	142.333	57.3333	9.45	4.47333	-1.07896	3.9403e-05	0.00432658	yes	LOC_Os09g31130	citrate transporter, putative, expressed	-	-	-	-	GO:0043226//organelle;GO:0044424//intracellular part;GO:0044444//cytoplasmic part;GO:0043229//intracellular organelle;GO:0005623//cell;GO:0043231//intracellular membrane-bounded organelle;GO:0005773//vacuole;GO:0005737//cytoplasm;GO:0044464//cell part;GO:0043227//membrane-bounded organelle;GO:0005622//intracellular	GO:0005215//transporter activity	GO:0019725//cellular homeostasis;GO:0044699//single-organism process;GO:0042592//homeostatic process;GO:0065008//regulation of biological quality;GO:0009987//cellular process;GO:0051179//localization;GO:0065007//biological regulation;GO:0044763//single-organism cellular process;GO:0051234//establishment of localization;GO:0006810//transport
LOC_Os09g31350	27.6667	3	2.44	0.313333	-2.96111	5.57763e-06	0.000852944	yes	LOC_Os09g31350	expressed protein	-	-	-	-	GO:0005575//cellular_component	GO:0003674//molecular_function	GO:0008150//biological_process
LOC_Os09g32320	8.33333	35.3333	0.843333	3.87333	2.1994	5.26505e-06	0.000820123	yes	LOC_Os09g32320	growth regulator related protein, putative, expressed	-	-	-	-	GO:0030312//external encapsulating structure;GO:0044444//cytoplasmic part;GO:0043229//intracellular organelle;GO:0043226//organelle;GO:0044424//intracellular part;GO:0005623//cell;GO:0005618//cell wall;GO:0005622//intracellular;GO:0071944//cell periphery;GO:0012505//endomembrane system;GO:0043231//intracellular membrane-bounded organelle;GO:0044464//cell part;GO:0005737//cytoplasm;GO:0005794//Gol…	GO:0003674//molecular_function	GO:0008150//biological_process
LOC_Os09g35030	122.333	214.333	17.6567	36.2633	1.0383	0.000123561	0.0106239	yes	LOC_Os09g35030	dehydration-responsive element-binding protein, putative, expressed	-	-	-	-	GO:0043227//membrane-bounded organelle;GO:0044464//cell part;GO:0043226//organelle;GO:0005623//cell;GO:0043231//intracellular membrane-bounded organelle;GO:0044424//intracellular part;GO:0043229//intracellular organelle;GO:0005622//intracellular;GO:0005634//nucleus	GO:0003677//DNA binding;GO:0097159//organic cyclic compound binding;GO:0003700//transcription factor activity, sequence-specific DNA binding;GO:0001071//nucleic acid binding transcription factor activity;GO:1901363//heterocyclic compound binding;GO:0005488//binding;GO:0003676//nucleic acid binding	GO:1901360//organic cyclic compound metabolic process;GO:0006139//nucleobase-containing compound metabolic process;GO:0009058//biosynthetic process;GO:0008152//metabolic process;GO:0009987//cellular process;GO:0006725//cellular aromatic compound metabolic process;GO:0006950//response to stress;GO:0050896//response to stimulus;GO:0006807//nitrogen compound metabolic process;GO:0071704//organic sub…
LOC_Os09g36680	3383.67	327.667	512.06	59.1067	-3.11492	1.14222e-11	7.0839e-09	yes	LOC_Os09g36680	ribonuclease T2 family domain containing protein, expressed	-	-	-	-	GO:0005623//cell	GO:0003824//catalytic activity;GO:0016788//hydrolase activity, acting on ester bonds;GO:0016787//hydrolase activity;GO:1901363//heterocyclic compound binding;GO:0003676//nucleic acid binding;GO:0097159//organic cyclic compound binding;GO:0003723//RNA binding;GO:0004518//nuclease activity;GO:0005488//binding	GO:0008152//metabolic process;GO:0008150//biological_process
LOC_Os09g38239	53.6667	12	6.06333	1.57667	-1.94323	0.000203598	0.0159684	yes	LOC_Os09g38239	sulfotransferase domain containing protein, expressed	-	-	-	-	GO:0005575//cellular_component	GO:0016740//transferase activity;GO:0003824//catalytic activity	GO:0008150//biological_process;GO:0008152//metabolic process
LOC_Os10g02040	66.1567	299.187	8.52	38.6133	2.18017	8.1833e-06	0.0011864	yes	LOC_Os10g02040	peroxidase precursor, putative, expressed	Metabolism	Biosynthesis of other secondary metabolites	ko00940//Phenylpropanoid biosynthesis	K00430	GO:0043231//intracellular membrane-bounded organelle;GO:0043226//organelle;GO:0044464//cell part;GO:0005737//cytoplasm;GO:0043229//intracellular organelle;GO:0044444//cytoplasmic part;GO:0005623//cell;GO:0005773//vacuole;GO:0044424//intracellular part;GO:0043227//membrane-bounded organelle;GO:0005622//intracellular	GO:0003824//catalytic activity;GO:0005488//binding	GO:0008152//metabolic process;GO:0040007//growth;GO:0050896//response to stimulus;GO:0006950//response to stress
LOC_Os10g02340	10	0.666667	1.04	0.0733333	-3.82597	4.64405e-05	0.00496899	yes	LOC_Os10g02340	peptide transporter PTR2, putative, expressed	-	-	-	-	GO:0044424//intracellular part;GO:0044464//cell part;GO:0043231//intracellular membrane-bounded organelle;GO:0043227//membrane-bounded organelle;GO:0016020//membrane;GO:0044444//cytoplasmic part;GO:0043226//organelle;GO:0043229//intracellular organelle;GO:0005622//intracellular;GO:0005773//vacuole;GO:0005623//cell;GO:0005737//cytoplasm	GO:0005215//transporter activity	GO:0051179//localization;GO:0006810//transport;GO:0051234//establishment of localization
LOC_Os10g02840	4.05667	30.5567	0.61	4.67667	2.9386	1.16012e-07	3.26491e-05	yes	LOC_Os10g02840	O-methyltransferase, putative, expressed	-	-	-	-	GO:0044444//cytoplasmic part;GO:0005829//cytosol;GO:0044464//cell part;GO:0005737//cytoplasm;GO:0044424//intracellular part;GO:0005622//intracellular;GO:0005623//cell	GO:0016740//transferase activity;GO:0003824//catalytic activity	GO:0044699//single-organism process;GO:0009987//cellular process;GO:0019748//secondary metabolic process;GO:0009058//biosynthetic process;GO:0044710//single-organism metabolic process;GO:0008152//metabolic process
LOC_Os10g04090	37.61	73.1033	1.67333	3.81333	1.18833	6.89585e-05	0.00694226	yes	LOC_Os10g04090	disease resistance RPP13-like protein 1, putative, expressed	-	-	-	-	-	GO:0005515//protein binding;GO:0005488//binding	GO:0050896//response to stimulus;GO:0006950//response to stress
LOC_Os10g05780	69	19	6.42333	2.09	-1.61982	1.23106e-06	0.000249867	yes	LOC_Os10g05780	POT domain containing peptide transporter, putative, expressed	-	-	-	-	GO:0016020//membrane	GO:0005215//transporter activity	GO:0051179//localization;GO:0006810//transport;GO:0051234//establishment of localization
LOC_Os10g08014	28	6.66667	3.13	0.833333	-1.9092	0.000133149	0.0112114	yes	LOC_Os10g08014	white-brown complex homolog protein 11, putative, expressed	-	-	-	-	GO:0005886//plasma membrane;GO:0016020//membrane;GO:0005623//cell;GO:0044464//cell part;GO:0071944//cell periphery	GO:0003824//catalytic activity;GO:0016787//hydrolase activity;GO:0005215//transporter activity	GO:0044238//primary metabolic process;GO:0006807//nitrogen compound metabolic process;GO:0034641//cellular nitrogen compound metabolic process;GO:0051179//localization;GO:1901360//organic cyclic compound metabolic process;GO:0071704//organic substance metabolic process;GO:0009628//response to abiotic stimulus;GO:0006950//response to stress;GO:0009056//catabolic process;GO:0006139//nucleobase-cont…
LOC_Os10g08026	1.66667	8.20333	0.183333	1.15667	2.65743	0.000809844	0.0469233	yes	LOC_Os10g08026	lecithin:cholesterol acyltransferase, putative, expressed	Metabolism	Lipid metabolism	ko00564//Glycerophospholipid metabolism	K06129	GO:0043229//intracellular organelle;GO:0005622//intracellular;GO:0043231//intracellular membrane-bounded organelle;GO:0044444//cytoplasmic part;GO:0044464//cell part;GO:0016020//membrane;GO:0044424//intracellular part;GO:0043227//membrane-bounded organelle;GO:0005773//vacuole;GO:0005737//cytoplasm;GO:0005623//cell;GO:0043226//organelle	GO:0016740//transferase activity;GO:0003824//catalytic activity	GO:0044710//single-organism metabolic process;GO:0044238//primary metabolic process;GO:0006629//lipid metabolic process;GO:0008152//metabolic process;GO:0071704//organic substance metabolic process;GO:0044699//single-organism process
LOC_Os10g10130	284	952.667	16.51	56.6167	1.77789	0.000576256	0.0356067	yes	LOC_Os10g10130	OsWAK112d - OsWAK receptor-like protein kinase, expressed	-	-	-	-	GO:0005618//cell wall;GO:0016020//membrane;GO:0030312//external encapsulating structure;GO:0044464//cell part;GO:0005623//cell;GO:0005886//plasma membrane;GO:0071944//cell periphery	GO:0005488//binding;GO:0003824//catalytic activity;GO:0016772//transferase activity, transferring phosphorus-containing groups;GO:0016301//kinase activity;GO:0005515//protein binding;GO:0016740//transferase activity	GO:0050896//response to stimulus;GO:0019538//protein metabolic process;GO:0009987//cellular process;GO:0008152//metabolic process;GO:0036211//protein modification process;GO:0009607//response to biotic stimulus;GO:0043170//macromolecule metabolic process;GO:0044260//cellular macromolecule metabolic process;GO:0044267//cellular protein metabolic process;GO:0044238//primary metabolic process;GO:007…
LOC_Os10g16974	351.667	87.6667	27.4667	8.14333	-1.75399	6.10337e-09	2.27113e-06	yes	LOC_Os10g16974	cytochrome P450, putative, expressed	Metabolism	Biosynthesis of other secondary metabolites	ko00941//Flavonoid biosynthesis;ko00944//Flavone and flavonol biosynthesis	K05280	-	GO:0005488//binding;GO:0019825//oxygen binding;GO:0003824//catalytic activity	GO:0009987//cellular process;GO:0009628//response to abiotic stimulus;GO:0009058//biosynthetic process;GO:0009719//response to endogenous stimulus;GO:0019748//secondary metabolic process;GO:0050896//response to stimulus;GO:0008152//metabolic process;GO:0044699//single-organism process;GO:0044710//single-organism metabolic process
LOC_Os10g18150	533.667	98	38.3767	7.70667	-2.31605	4.25579e-05	0.00459762	yes	LOC_Os10g18150	crooked neck, putative, expressed	Genetic Information Processing	Transcription	ko03040//Spliceosome	K12869	GO:0005623//cell;GO:0005622//intracellular;GO:0044464//cell part	GO:0005488//binding	GO:0034641//cellular nitrogen compound metabolic process;GO:0044237//cellular metabolic process;GO:1901360//organic cyclic compound metabolic process;GO:0008152//metabolic process;GO:0046483//heterocycle metabolic process;GO:0006139//nucleobase-containing compound metabolic process;GO:0006807//nitrogen compound metabolic process;GO:0006725//cellular aromatic compound metabolic process;GO:0044238/…
LOC_Os10g21670	17	1.33333	4	0.306667	-3.70526	0.000291997	0.0207182	yes	LOC_Os10g21670	dehydration stress-induced protein, putative, expressed	-	-	-	-	GO:0044444//cytoplasmic part;GO:0043226//organelle;GO:0044464//cell part;GO:0005737//cytoplasm;GO:0043231//intracellular membrane-bounded organelle;GO:0009579//thylakoid;GO:0043227//membrane-bounded organelle;GO:0043229//intracellular organelle;GO:0005623//cell;GO:0009536//plastid;GO:0005622//intracellular;GO:0044424//intracellular part;GO:0016020//membrane	GO:0003674//molecular_function	GO:0008150//biological_process
LOC_Os10g22050	20.6667	52	9.63667	26.81	1.47617	2.56619e-05	0.00309143	yes	LOC_Os10g22050	expressed protein	-	-	-	-	-	-	-
LOC_Os10g25850	0.333333	6.66667	0.05	1.55667	4.96039	0.000320583	0.0222212	yes	LOC_Os10g25850	nuclear transcription factor Y subunit, putative, expressed	-	-	-	-	GO:0070013//intracellular organelle lumen;GO:0044464//cell part;GO:0044424//intracellular part;GO:0043227//membrane-bounded organelle;GO:0005654//nucleoplasm;GO:0031981//nuclear lumen;GO:0005623//cell;GO:0043226//organelle;GO:0005622//intracellular;GO:0044446//intracellular organelle part;GO:0031974//membrane-enclosed lumen;GO:0044428//nuclear part;GO:0005634//nucleus;GO:0043231//intracellular me…	GO:0001071//nucleic acid binding transcription factor activity;GO:0003700//transcription factor activity, sequence-specific DNA binding	GO:0044238//primary metabolic process;GO:0044237//cellular metabolic process;GO:0006725//cellular aromatic compound metabolic process;GO:0071704//organic substance metabolic process;GO:0046483//heterocycle metabolic process;GO:0008152//metabolic process;GO:0006139//nucleobase-containing compound metabolic process;GO:0009987//cellular process;GO:0006807//nitrogen compound metabolic process;GO:0034…
LOC_Os10g29650	484.333	59	15.6	2.37667	-2.71453	1.94084e-20	4.06242e-17	yes	LOC_Os10g29650	retrotransposon protein, putative, unclassified, expressed	-	-	-	-	-	-	-
LOC_Os10g30790	783.58	1683.71	56.5933	133.357	1.23659	2.29502e-06	0.000424643	yes	LOC_Os10g30790	inorganic phosphate transporter, putative, expressed	-	-	-	-	GO:0043227//membrane-bounded organelle;GO:0005634//nucleus;GO:0044464//cell part;GO:0071944//cell periphery;GO:0043229//intracellular organelle;GO:0005773//vacuole;GO:0005886//plasma membrane;GO:0005623//cell;GO:0043231//intracellular membrane-bounded organelle;GO:0016020//membrane;GO:0044444//cytoplasmic part;GO:0005737//cytoplasm;GO:0044424//intracellular part;GO:0005622//intracellular;GO:00055…	GO:0005215//transporter activity	GO:0009719//response to endogenous stimulus;GO:0009987//cellular process;GO:0050896//response to stimulus;GO:0006810//transport;GO:0051179//localization;GO:0051234//establishment of localization
LOC_Os10g31320	198.667	75.6667	47.2733	20.4967	-1.20564	0.000333274	0.0228249	yes	LOC_Os10g31320	retrotransposon protein, putative, unclassified, expressed	-	-	-	-	-	-	-
LOC_Os10g33370	15.6667	2	0.736667	0.116667	-2.65862	0.000317693	0.0221196	yes	LOC_Os10g33370	3-ketoacyl-CoA synthase precursor, putative, expressed	Metabolism	Lipid metabolism	ko00062//Fatty acid elongation	K15397	GO:0012505//endomembrane system;GO:0044424//intracellular part;GO:0043226//organelle;GO:0044444//cytoplasmic part;GO:0005783//endoplasmic reticulum;GO:0043231//intracellular membrane-bounded organelle;GO:0043229//intracellular organelle;GO:0005623//cell;GO:0043227//membrane-bounded organelle;GO:0005622//intracellular;GO:0005737//cytoplasm;GO:0044464//cell part	GO:0003824//catalytic activity;GO:0016740//transferase activity	GO:0008152//metabolic process
LOC_Os10g33760	8.33333	23.6667	0.966667	3.12	1.69046	0.000191088	0.0153099	yes	LOC_Os10g33760	No apical meristem protein, putative, expressed	-	-	-	-	GO:0005575//cellular_component	GO:0001071//nucleic acid binding transcription factor activity;GO:0003700//transcription factor activity, sequence-specific DNA binding	GO:0032501//multicellular organismal process;GO:0046483//heterocycle metabolic process;GO:0009058//biosynthetic process;GO:0006807//nitrogen compound metabolic process;GO:1901360//organic cyclic compound metabolic process;GO:0044238//primary metabolic process;GO:0044707//single-multicellular organism process;GO:0006139//nucleobase-containing compound metabolic process;GO:0009987//cellular process…
LOC_Os10g34310	70.6667	147.667	5.60667	14.02	1.32227	3.48032e-06	0.000590936	yes	LOC_Os10g34310	PPR repeat containing protein, expressed	-	-	-	-	GO:0005575//cellular_component	GO:0003674//molecular_function	GO:0008150//biological_process
LOC_Os10g35160	0	14.65	0.001	1.12667	10.1378	7.59668e-10	3.2617e-07	yes	LOC_Os10g35160	expressed protein	-	-	-	-	-	-	-
LOC_Os10g36170	112.333	30.3333	34.1467	9.91333	-1.7843	4.16311e-06	0.000667094	yes	LOC_Os10g36170	LTPL160 - Protease inhibitor/seed storage/LTP family protein precursor, expressed	-	-	-	-	GO:0005623//cell	GO:0005488//binding;GO:0008289//lipid binding	GO:0051234//establishment of localization;GO:0051179//localization;GO:0006810//transport
LOC_Os10g37660	51.6667	19	4.39	1.86	-1.23892	0.00043723	0.0282135	yes	LOC_Os10g37660	trehalase precursor, putative, expressed	Metabolism	Carbohydrate metabolism	ko00500//Starch and sucrose metabolism	K01194	GO:0005623//cell;GO:0044464//cell part;GO:0005886//plasma membrane;GO:0071944//cell periphery;GO:0016020//membrane	GO:0016787//hydrolase activity;GO:0003824//catalytic activity	GO:0044238//primary metabolic process;GO:0009056//catabolic process;GO:0008152//metabolic process;GO:0005975//carbohydrate metabolic process;GO:0071704//organic substance metabolic process;GO:0009987//cellular process
LOC_Os10g37760	53.6667	160.667	6.49333	23.2	1.83709	4.33887e-08	1.35199e-05	yes	LOC_Os10g37760	OsRhmbd17 - Putative Rhomboid homologue, expressed	-	-	-	-	GO:0005794//Golgi apparatus;GO:0043231//intracellular membrane-bounded organelle;GO:0044424//intracellular part;GO:0012505//endomembrane system;GO:0005622//intracellular;GO:0005575//cellular_component;GO:0005623//cell;GO:0005737//cytoplasm;GO:0044444//cytoplasmic part;GO:0043229//intracellular organelle;GO:0044464//cell part;GO:0043227//membrane-bounded organelle;GO:0043226//organelle	GO:0016787//hydrolase activity;GO:0003824//catalytic activity	GO:0008152//metabolic process
LOC_Os10g38080	83.6667	199	5.68	14.7967	1.38131	1.25517e-07	3.50297e-05	yes	LOC_Os10g38080	OsSub61 - Putative Subtilisin homologue, expressed	-	-	-	-	GO:0016020//membrane;GO:0044464//cell part;GO:0071944//cell periphery;GO:0005618//cell wall;GO:0005886//plasma membrane;GO:0005623//cell;GO:0030312//external encapsulating structure	GO:0016787//hydrolase activity;GO:0003824//catalytic activity	GO:0048856//anatomical structure development;GO:0009653//anatomical structure morphogenesis;GO:0032502//developmental process;GO:0009987//cellular process;GO:0044238//primary metabolic process;GO:0007275//multicellular organism development;GO:0019538//protein metabolic process;GO:0044767//single-organism developmental process;GO:0043170//macromolecule metabolic process;GO:0071704//organic substan…
LOC_Os10g38196	21.5633	154.097	9.07667	74.4833	3.03668	9.50585e-07	0.000205561	yes	LOC_Os10g38196	uncharacterized protein ycf68, putative	-	-	-	-	-	-	-
LOC_Os10g38540	20.8633	1.68333	2.76333	0.263333	-3.39145	1.68132e-05	0.00217403	yes	LOC_Os10g38540	glutathione S-transferase, putative, expressed	Metabolism	Metabolism of other amino acids	ko00480//Glutathione metabolism	K00799	GO:0044464//cell part;GO:0005623//cell;GO:0044424//intracellular part;GO:0005737//cytoplasm;GO:0005622//intracellular	GO:0003824//catalytic activity;GO:0016740//transferase activity	GO:0019748//secondary metabolic process;GO:0044710//single-organism metabolic process;GO:0009987//cellular process;GO:0008152//metabolic process;GO:0009056//catabolic process;GO:0044699//single-organism process
LOC_Os10g39044	0	7.33333	0.001	4.8	12.2288	0.000620303	0.0377022	yes	LOC_Os10g39044	expressed protein	-	-	-	-	-	-	-
LOC_Os10g40620	28.3333	8	2.78	0.856667	-1.69828	0.000468311	0.0298425	yes	LOC_Os10g40620	expressed protein	-	-	-	-	GO:0043227//membrane-bounded organelle;GO:0043229//intracellular organelle;GO:0005737//cytoplasm;GO:0043231//intracellular membrane-bounded organelle;GO:0044444//cytoplasmic part;GO:0043226//organelle;GO:0044424//intracellular part;GO:0044464//cell part;GO:0005622//intracellular;GO:0005623//cell;GO:0009536//plastid	-	GO:0008150//biological_process
LOC_Os10g40990	60	14	8.09667	2.26667	-1.83676	1.85034e-07	4.95742e-05	yes	LOC_Os10g40990	flavonol synthase/flavanone 3-hydroxylase, putative, expressed	-	-	-	-	GO:0005575//cellular_component	GO:0003824//catalytic activity	GO:0008152//metabolic process
LOC_Os10g41330	126	387.333	18.74	65.1533	1.79772	2.13513e-13	1.93258e-10	yes	LOC_Os10g41330	AP2 domain containing protein, expressed	-	-	-	-	GO:0043227//membrane-bounded organelle;GO:0005623//cell;GO:0044464//cell part;GO:0044424//intracellular part;GO:0005622//intracellular;GO:0043231//intracellular membrane-bounded organelle;GO:0005634//nucleus;GO:0043229//intracellular organelle;GO:0043226//organelle	GO:0005488//binding;GO:0003700//transcription factor activity, sequence-specific DNA binding;GO:0003677//DNA binding;GO:0097159//organic cyclic compound binding;GO:0001071//nucleic acid binding transcription factor activity;GO:0003676//nucleic acid binding;GO:1901363//heterocyclic compound binding	GO:0006807//nitrogen compound metabolic process;GO:0044237//cellular metabolic process;GO:0071704//organic substance metabolic process;GO:0009987//cellular process;GO:1901360//organic cyclic compound metabolic process;GO:0044238//primary metabolic process;GO:0034641//cellular nitrogen compound metabolic process;GO:0008152//metabolic process;GO:0006725//cellular aromatic compound metabolic process…
LOC_Os10g41838	3.66667	96.9933	0.393333	14.1467	5.16857	7.55878e-22	1.68762e-18	yes	LOC_Os10g41838	F-box protein interaction domain containing protein, expressed	-	-	-	-	-	-	-
LOC_Os11g02400	1315.36	566.377	219.593	108.323	-1.01949	9.35003e-07	0.000205561	yes	LOC_Os11g02400	LTPL8 - Protease inhibitor/seed storage/LTP family protein precursor, expressed	-	-	-	-	GO:0005623//cell;GO:0044464//cell part;GO:0005618//cell wall;GO:0030312//external encapsulating structure;GO:0071944//cell periphery;GO:0005576//extracellular region	GO:0008289//lipid binding;GO:0005488//binding	GO:0009719//response to endogenous stimulus;GO:0050896//response to stimulus;GO:0006950//response to stress;GO:0009628//response to abiotic stimulus
LOC_Os11g03230	165.72	64.9167	24.69	11.83	-1.06148	0.00015909	0.0130908	yes	LOC_Os11g03230	nucleoside-triphosphatase, putative, expressed	Metabolism	Nucleotide metabolism	ko00230//Purine metabolism;ko00240//Pyrimidine metabolism	K14641	GO:0005623//cell;GO:0005794//Golgi apparatus;GO:0044424//intracellular part;GO:0043226//organelle;GO:0043227//membrane-bounded organelle;GO:0005622//intracellular;GO:0044444//cytoplasmic part;GO:0012505//endomembrane system;GO:0043231//intracellular membrane-bounded organelle;GO:0044464//cell part;GO:0043229//intracellular organelle;GO:0005737//cytoplasm	GO:0003824//catalytic activity;GO:0005488//binding;GO:0005515//protein binding;GO:0016787//hydrolase activity	GO:0044237//cellular metabolic process;GO:0000003//reproduction;GO:0044703//multi-organism reproductive process;GO:0006807//nitrogen compound metabolic process;GO:1901360//organic cyclic compound metabolic process;GO:0006139//nucleobase-containing compound metabolic process;GO:0034641//cellular nitrogen compound metabolic process;GO:0008152//metabolic process;GO:0009987//cellular process;GO:00517…
LOC_Os11g04150	30.45	5.05	3.96	0.803333	-2.30143	1.46097e-06	0.000284767	yes	LOC_Os11g04150	major facilitator superfamily antiporter, putative, expressed	-	-	-	-	GO:0016020//membrane	GO:0005215//transporter activity	GO:0009607//response to biotic stimulus;GO:0009987//cellular process;GO:0006810//transport;GO:0050896//response to stimulus;GO:0051234//establishment of localization;GO:0051179//localization
LOC_Os11g06980	618	1438.33	48.8133	128.26	1.39372	1.07948e-11	6.95227e-09	yes	LOC_Os11g06980	BURP domain containing protein, expressed	-	-	-	-	GO:0005623//cell	GO:0003674//molecular_function	GO:0009719//response to endogenous stimulus;GO:0006950//response to stress;GO:0009628//response to abiotic stimulus;GO:0050896//response to stimulus
LOC_Os11g07960	165	358	19.6967	48.7733	1.30814	1.5891e-06	0.000304108	yes	LOC_Os11g07960	transferase family protein, putative, expressed	-	-	-	-	GO:0044464//cell part;GO:0005623//cell;GO:0005737//cytoplasm;GO:0044444//cytoplasmic part;GO:0005622//intracellular;GO:0044424//intracellular part;GO:0005829//cytosol	GO:0016740//transferase activity;GO:0003824//catalytic activity	GO:0044710//single-organism metabolic process;GO:0008152//metabolic process;GO:0009987//cellular process;GO:0019748//secondary metabolic process;GO:0044699//single-organism process;GO:0008150//biological_process;GO:0009058//biosynthetic process
LOC_Os11g08569	52.21	0.77	3.22667	0.05	-6.01197	1.15702e-16	1.7613e-13	yes	LOC_Os11g08569	cycloartenol synthase, putative, expressed	Metabolism	Lipid metabolism	ko00100//Steroid biosynthesis	K01853	GO:0005737//cytoplasm;GO:0005773//vacuole;GO:0043229//intracellular organelle;GO:0005623//cell;GO:0044424//intracellular part;GO:0043227//membrane-bounded organelle;GO:0005622//intracellular;GO:0043226//organelle;GO:0044464//cell part;GO:0044444//cytoplasmic part;GO:0043231//intracellular membrane-bounded organelle	GO:0003824//catalytic activity	GO:0071840//cellular component organization or biogenesis;GO:0071704//organic substance metabolic process;GO:0044767//single-organism developmental process;GO:0016043//cellular component organization;GO:0044238//primary metabolic process;GO:0008152//metabolic process;GO:0007275//multicellular organism development;GO:0044710//single-organism metabolic process;GO:0044699//single-organism process;GO…
LOC_Os11g12320	12.4267	55.0033	1.59667	7.26	2.18491	1.86975e-05	0.00236294	yes	LOC_Os11g12320	disease resistance protein RPM1, putative, expressed	Organismal Systems	Environmental adaptation	ko04626//Plant-pathogen interaction	K13457	GO:0071944//cell periphery;GO:0044464//cell part;GO:0016020//membrane;GO:0005886//plasma membrane;GO:0005623//cell	GO:0005515//protein binding;GO:1901363//heterocyclic compound binding;GO:0005488//binding;GO:1901265//nucleoside phosphate binding;GO:0036094//small molecule binding;GO:0000166//nucleotide binding;GO:0097159//organic cyclic compound binding	GO:0009987//cellular process;GO:0016265//death;GO:0044763//single-organism cellular process;GO:0008219//cell death;GO:0050896//response to stimulus;GO:0006950//response to stress;GO:0044699//single-organism process
LOC_Os11g15040	226.333	451.333	28.09	64.9133	1.20846	4.62244e-07	0.000109791	yes	LOC_Os11g15040	S-adenosyl-L-methionine:benzoic acid/salicylic acid carboxyl methyltransferase, putative, expressed	-	-	-	-	-	GO:0016740//transferase activity;GO:0003824//catalytic activity	GO:0009987//cellular process;GO:0008150//biological_process;GO:0008152//metabolic process
LOC_Os11g17954	0	12	0.001	1.47667	10.5281	2.83212e-08	9.39086e-06	yes	LOC_Os11g17954	transposon protein, putative, Pong sub-class, expressed	-	-	-	-	-	-	-
LOC_Os11g17970	57.3333	17	4.50333	1.53333	-1.55432	1.37502e-05	0.00186278	yes	LOC_Os11g17970	POT family protein, expressed	-	-	-	-	GO:0071944//cell periphery;GO:0016020//membrane;GO:0005623//cell;GO:0044464//cell part;GO:0005886//plasma membrane	GO:0005488//binding;GO:0005215//transporter activity	GO:0051179//localization;GO:0006810//transport;GO:0050896//response to stimulus;GO:0009607//response to biotic stimulus;GO:0051234//establishment of localization
LOC_Os11g18110	10	0.666667	1.10667	0.07	-3.98272	0.000123454	0.0106239	yes	LOC_Os11g18110	POT family protein, expressed	-	-	-	-	GO:0016020//membrane	GO:0005215//transporter activity	GO:0051234//establishment of localization;GO:0006810//transport;GO:0051179//localization
LOC_Os11g18194	22.6667	3	1.60667	0.25	-2.68407	2.31352e-05	0.00284853	yes	LOC_Os11g18194	cycloartenol synthase, putative, expressed	Metabolism	Metabolism of terpenoids and polyketides	ko00909//Sesquiterpenoid and triterpenoid biosynthesis	K19011	GO:0044464//cell part;GO:0044424//intracellular part;GO:0043231//intracellular membrane-bounded organelle;GO:0005623//cell;GO:0043227//membrane-bounded organelle;GO:0005622//intracellular;GO:0044444//cytoplasmic part;GO:0005773//vacuole;GO:0005737//cytoplasm;GO:0043226//organelle;GO:0043229//intracellular organelle	GO:0003824//catalytic activity	GO:0044238//primary metabolic process;GO:0009987//cellular process;GO:0071840//cellular component organization or biogenesis;GO:0032501//multicellular organismal process;GO:0044699//single-organism process;GO:0009058//biosynthetic process;GO:0044707//single-multicellular organism process;GO:0032502//developmental process;GO:0006629//lipid metabolic process;GO:0071704//organic substance metabolic …
LOC_Os11g19240	44.3333	4.33333	5.32333	0.666667	-2.99729	2.70168e-07	6.97976e-05	yes	LOC_Os11g19240	transmembrane amino acid transporter protein, putative, expressed	-	-	-	-	GO:0016020//membrane	GO:0005215//transporter activity	GO:0051234//establishment of localization;GO:0051179//localization;GO:0006810//transport;GO:0009987//cellular process
LOC_Os11g25040	7.33333	0	0.986667	0.001	-9.94642	0.000373318	0.0250048	yes	LOC_Os11g25040	plant-specific domain TIGR01615 family protein, expressed	-	-	-	-	GO:0005575//cellular_component	GO:0003674//molecular_function	GO:0008150//biological_process
LOC_Os11g26920	18.2967	0	1.98667	0.001	-10.9561	2.53982e-06	0.000454858	yes	LOC_Os11g26920	transposon protein, putative, Mariner sub-class, expressed	-	-	-	-	-	-	-
LOC_Os11g29920	1.33333	10.5833	0.0566667	0.456667	3.01057	0.000234783	0.0178012	yes	LOC_Os11g29920	NB-ARC domain containing protein, expressed	-	-	-	-	-	GO:0005515//protein binding;GO:0005488//binding	GO:0006950//response to stress;GO:0050896//response to stimulus
LOC_Os11g30560	50	10.3333	5.10667	1.13	-2.17606	5.37956e-06	0.000830237	yes	LOC_Os11g30560	dehydrogenase/reductase, putative, expressed	-	-	-	-	GO:0005623//cell	GO:0003824//catalytic activity	GO:0009719//response to endogenous stimulus;GO:0044699//single-organism process;GO:0006629//lipid metabolic process;GO:0008152//metabolic process;GO:0044710//single-organism metabolic process;GO:0050896//response to stimulus;GO:0044238//primary metabolic process;GO:0071704//organic substance metabolic process
LOC_Os11g32650	924	270.333	85.5467	30.7233	-1.47738	5.39121e-10	2.47331e-07	yes	LOC_Os11g32650	chalcone synthase, putative, expressed	Organismal Systems;Metabolism	Environmental adaptation;Biosynthesis of other secondary metabolites	ko04712//Circadian rhythm - plant;ko00941//Flavonoid biosynthesis	K00660	GO:0044424//intracellular part;GO:0005783//endoplasmic reticulum;GO:0005634//nucleus;GO:0044464//cell part;GO:0043229//intracellular organelle;GO:0005737//cytoplasm;GO:0044444//cytoplasmic part;GO:0005773//vacuole;GO:0043227//membrane-bounded organelle;GO:0005623//cell;GO:0005622//intracellular;GO:0043231//intracellular membrane-bounded organelle;GO:0043226//organelle;GO:0016020//membrane;GO:0012…	GO:0016740//transferase activity;GO:0003824//catalytic activity	GO:0044710//single-organism metabolic process;GO:0051234//establishment of localization;GO:0008152//metabolic process;GO:0006950//response to stress;GO:0051179//localization;GO:0009058//biosynthetic process;GO:0050896//response to stimulus;GO:0006810//transport;GO:0019748//secondary metabolic process;GO:0044699//single-organism process;GO:0009719//response to endogenous stimulus;GO:0009987//cellu…
LOC_Os11g33270	31	77.6667	4.4	12.7433	1.53417	2.40658e-06	0.000440417	yes	LOC_Os11g33270	glycosyl hydrolases family 16, putative, expressed	-	-	-	-	GO:0044464//cell part;GO:0005618//cell wall;GO:0005576//extracellular region;GO:0030312//external encapsulating structure;GO:0071944//cell periphery;GO:0005623//cell	GO:0003824//catalytic activity;GO:0016787//hydrolase activity;GO:0016740//transferase activity	GO:0071704//organic substance metabolic process;GO:0005975//carbohydrate metabolic process;GO:0044238//primary metabolic process;GO:0009987//cellular process;GO:0008152//metabolic process
LOC_Os11g34600	0	6.18333	0.001	0.24	7.90689	0.000864983	0.0495184	yes	LOC_Os11g34600	retrotransposon protein, putative, unclassified, expressed	-	-	-	-	-	-	-
LOC_Os11g35540	140.24	318.237	7.43333	19.8067	1.4139	3.10767e-05	0.00358883	yes	LOC_Os11g35540	expressed protein	-	-	-	-	-	-	-
LOC_Os11g35930	23	0	2.61333	0.001	-11.3517	4.46111e-10	2.07504e-07	yes	LOC_Os11g35930	chalcone synthase, putative, expressed	-	-	-	-	GO:0044444//cytoplasmic part;GO:0044464//cell part;GO:0005623//cell;GO:0005773//vacuole;GO:0043226//organelle;GO:0016020//membrane;GO:0005737//cytoplasm;GO:0012505//endomembrane system;GO:0005622//intracellular;GO:0044424//intracellular part;GO:0005634//nucleus;GO:0043231//intracellular membrane-bounded organelle;GO:0043227//membrane-bounded organelle;GO:0005783//endoplasmic reticulum;GO:0043229/…	GO:0003824//catalytic activity;GO:0016740//transferase activity	GO:0019748//secondary metabolic process;GO:0050896//response to stimulus;GO:0009987//cellular process;GO:0009628//response to abiotic stimulus;GO:0009058//biosynthetic process;GO:0008152//metabolic process;GO:0044699//single-organism process;GO:0006810//transport;GO:0044710//single-organism metabolic process;GO:0009719//response to endogenous stimulus;GO:0051179//localization;GO:0051234//establis…
LOC_Os11g36990	0	12.17	0.001	0.753333	9.55714	0.000186055	0.0149783	yes	LOC_Os11g36990	transposon protein, putative, CACTA, En/Spm sub-class, expressed	-	-	-	-	-	-	-
LOC_Os11g37700	73.6667	14.6667	2.86667	0.566667	-2.3388	0.00011996	0.0105445	yes	LOC_Os11g37700	pleiotropic drug resistance protein, putative, expressed	-	-	-	-	GO:0016020//membrane	GO:0005215//transporter activity;GO:0016787//hydrolase activity;GO:0003824//catalytic activity	GO:0044237//cellular metabolic process;GO:0046483//heterocycle metabolic process;GO:0006139//nucleobase-containing compound metabolic process;GO:0006725//cellular aromatic compound metabolic process;GO:0009056//catabolic process;GO:0006807//nitrogen compound metabolic process;GO:1901360//organic cyclic compound metabolic process;GO:0034641//cellular nitrogen compound metabolic process;GO:0051179/…
LOC_Os11g38580	12.8267	42.2533	0.586667	2.27	1.95208	2.74233e-07	6.97976e-05	yes	LOC_Os11g38580	NBS-LRR type disease resistance protein, putative, expressed	-	-	-	-	GO:0005623//cell;GO:0071944//cell periphery;GO:0016020//membrane;GO:0005886//plasma membrane;GO:0044464//cell part	GO:0000166//nucleotide binding;GO:1901363//heterocyclic compound binding;GO:1901265//nucleoside phosphate binding;GO:0005488//binding;GO:0005515//protein binding;GO:0097159//organic cyclic compound binding;GO:0036094//small molecule binding	GO:0006950//response to stress;GO:0050896//response to stimulus;GO:0044699//single-organism process;GO:0008219//cell death;GO:0009987//cellular process;GO:0044763//single-organism cellular process;GO:0016265//death
LOC_Os11g40009	25.6667	65.8767	2.37	7.23333	1.60977	2.37318e-05	0.00287963	yes	LOC_Os11g40009	phospholipase, patatin family, putative, expressed	-	-	-	-	GO:0005737//cytoplasm;GO:0005623//cell;GO:0005622//intracellular;GO:0044464//cell part;GO:0044424//intracellular part;GO:0016020//membrane	GO:0003674//molecular_function;GO:0003824//catalytic activity;GO:0016787//hydrolase activity	GO:0008150//biological_process;GO:0044710//single-organism metabolic process;GO:0008152//metabolic process;GO:0009058//biosynthetic process;GO:0006950//response to stress;GO:0009607//response to biotic stimulus;GO:0071704//organic substance metabolic process;GO:0008219//cell death;GO:0016265//death;GO:0044699//single-organism process;GO:0006629//lipid metabolic process;GO:0044763//single-organism…
LOC_Os11g41710	601.7	73.91	54.7933	8.01333	-2.77353	1.42961e-29	7.97959e-26	yes	LOC_Os11g41710	cytochrome P450, putative, expressed	-	-	-	-	-	GO:0005488//binding;GO:0003824//catalytic activity;GO:0003674//molecular_function;GO:0019825//oxygen binding	GO:0006950//response to stress;GO:0008152//metabolic process;GO:0050896//response to stimulus;GO:0009628//response to abiotic stimulus
LOC_Os11g44190	15.0033	0	0.573333	0.001	-9.16323	1.03867e-06	0.000220158	yes	LOC_Os11g44190	retrotransposon protein, putative, unclassified, expressed	-	-	-	-	-	-	-
LOC_Os12g01030	184.96	336.733	34.0267	68.1167	1.00134	6.9165e-05	0.00694226	yes	LOC_Os12g01030	monoglyceride lipase, putative, expressed	-	-	-	-	-	GO:0003824//catalytic activity	GO:0008152//metabolic process
LOC_Os12g02340	1349.73	345.513	259.17	77.32	-1.74499	9.83565e-19	1.73366e-15	yes	LOC_Os12g02340	LTPL14 - Protease inhibitor/seed storage/LTP family protein precursor, expressed	-	-	-	-	GO:0044464//cell part;GO:0071944//cell periphery;GO:0005618//cell wall;GO:0005886//plasma membrane;GO:0030312//external encapsulating structure;GO:0005623//cell;GO:0005576//extracellular region;GO:0016020//membrane	GO:0005488//binding;GO:0008289//lipid binding	GO:0006950//response to stress;GO:0016265//death;GO:0009628//response to abiotic stimulus;GO:0051179//localization;GO:0044763//single-organism cellular process;GO:0008219//cell death;GO:0050896//response to stimulus;GO:0051234//establishment of localization;GO:0006810//transport;GO:0071840//cellular component organization or biogenesis;GO:0016043//cellular component organization;GO:0009987//cellu…
LOC_Os12g02370	434.743	154.42	57.51	24.69	-1.21989	8.55311e-06	0.00123467	yes	LOC_Os12g02370	chalcone--flavonone isomerase, putative, expressed	-	-	-	-	GO:0005575//cellular_component	GO:0003824//catalytic activity	GO:0050896//response to stimulus;GO:0008152//metabolic process;GO:0009628//response to abiotic stimulus
LOC_Os12g02880	8.23333	0.333333	1.39333	0.0633333	-4.45943	0.000241036	0.0179473	yes	LOC_Os12g02880	E2F-related protein, putative, expressed	-	-	-	-	GO:0005575//cellular_component	GO:0003674//molecular_function	GO:0008150//biological_process
LOC_Os12g02980	1095.95	375.417	111.01	43.3733	-1.35581	7.32915e-08	2.11598e-05	yes	LOC_Os12g02980	nucleoside-triphosphatase, putative, expressed	Metabolism	Nucleotide metabolism	ko00230//Purine metabolism;ko00240//Pyrimidine metabolism	K14641	-	GO:0003824//catalytic activity;GO:0016787//hydrolase activity;GO:0005488//binding;GO:0005515//protein binding	GO:0009856//pollination;GO:0022414//reproductive process;GO:0044237//cellular metabolic process;GO:0044238//primary metabolic process;GO:0006139//nucleobase-containing compound metabolic process;GO:0071704//organic substance metabolic process;GO:0006807//nitrogen compound metabolic process;GO:0000003//reproduction;GO:0009987//cellular process;GO:0006725//cellular aromatic compound metabolic proce…
LOC_Os12g06220	127.667	258	22.7767	51.5667	1.17888	1.47103e-06	0.000284767	yes	LOC_Os12g06220	harpin-induced protein 1 domain containing protein, expressed	-	-	-	-	GO:0043227//membrane-bounded organelle;GO:0044424//intracellular part;GO:0005886//plasma membrane;GO:0005773//vacuole;GO:0005622//intracellular;GO:0044464//cell part;GO:0071944//cell periphery;GO:0043226//organelle;GO:0044444//cytoplasmic part;GO:0005737//cytoplasm;GO:0005575//cellular_component;GO:0043231//intracellular membrane-bounded organelle;GO:0016020//membrane;GO:0043229//intracellular or…	GO:0003674//molecular_function	GO:0006950//response to stress;GO:0050896//response to stimulus;GO:0009607//response to biotic stimulus
LOC_Os12g07180	0	10.3333	0.001	1.14	10.1548	0.000120811	0.0105915	yes	LOC_Os12g07180	transposon protein, putative, Pong sub-class, expressed	-	-	-	-	-	-	-
LOC_Os12g07810	21.3333	4.33333	2.19	0.53	-2.04687	0.000468711	0.0298425	yes	LOC_Os12g07810	aldehyde dehydrogenase, putative, expressed	Metabolism	Amino acid metabolism;Carbohydrate metabolism;Metabolism of other amino acids;Lipid metabolism	ko00010//Glycolysis / Gluconeogenesis;ko00620//Pyruvate metabolism;ko00040//Pentose and glucuronate interconversions;ko00561//Glycerolipid metabolism;ko00330//Arginine and proline metabolism;ko00280//Valine, leucine and isoleucine degradation;ko00410//beta-Alanine metabolism;ko00053//Ascorbate and aldarate metabolism;ko00071//Fatty acid degradation;ko00380//Tryptophan metabolism;ko00310//Lysine d…	K00128	GO:0005737//cytoplasm;GO:0043226//organelle;GO:0005773//vacuole;GO:0043229//intracellular organelle;GO:0012505//endomembrane system;GO:0044444//cytoplasmic part;GO:0043231//intracellular membrane-bounded organelle;GO:0044464//cell part;GO:0016020//membrane;GO:0043227//membrane-bounded organelle;GO:0005783//endoplasmic reticulum;GO:0005575//cellular_component;GO:0005623//cell;GO:0044424//intracell…	GO:0003824//catalytic activity	GO:0009628//response to abiotic stimulus;GO:0006950//response to stress;GO:0050896//response to stimulus;GO:0008152//metabolic process;GO:0009719//response to endogenous stimulus
LOC_Os12g08930	13	0.333333	4.55333	0.146667	-4.95631	0.000741938	0.043684	yes	LOC_Os12g08930	expressed protein	-	-	-	-	-	-	-
LOC_Os12g12190	0	5.18333	0.001	0.38	8.56986	0.000604925	0.0371043	yes	LOC_Os12g12190	expressed protein	-	-	-	-	GO:0044424//intracellular part;GO:0005622//intracellular;GO:0043227//membrane-bounded organelle;GO:0005623//cell;GO:0043226//organelle;GO:0005634//nucleus;GO:0044464//cell part;GO:0043231//intracellular membrane-bounded organelle;GO:0005737//cytoplasm;GO:0043229//intracellular organelle	GO:0036094//small molecule binding;GO:0000166//nucleotide binding;GO:0097159//organic cyclic compound binding;GO:1901363//heterocyclic compound binding;GO:0003676//nucleic acid binding;GO:0005488//binding;GO:1901265//nucleoside phosphate binding;GO:0003723//RNA binding	GO:0034641//cellular nitrogen compound metabolic process;GO:0006518//peptide metabolic process;GO:0043170//macromolecule metabolic process;GO:0044267//cellular protein metabolic process;GO:1901576//organic substance biosynthetic process;GO:0019538//protein metabolic process;GO:0046483//heterocycle metabolic process;GO:0043603//cellular amide metabolic process;GO:0009059//macromolecule biosyntheti…
LOC_Os12g16240	60.1433	18.22	19.86	6.93333	-1.51824	4.61441e-05	0.0049531	yes	LOC_Os12g16240	nmrA-like family domain containing protein, expressed	-	-	-	-	GO:0005575//cellular_component	GO:0003824//catalytic activity	GO:0019748//secondary metabolic process;GO:0008152//metabolic process;GO:0044710//single-organism metabolic process;GO:0044699//single-organism process;GO:0009058//biosynthetic process;GO:0009987//cellular process
LOC_Os12g22110	26.6667	6.33333	2.78333	0.71	-1.97092	0.000232763	0.0177973	yes	LOC_Os12g22110	ABC-2 type transporter, putative, expressed	-	-	-	-	GO:0044464//cell part;GO:0005886//plasma membrane;GO:0005623//cell;GO:0071944//cell periphery;GO:0016020//membrane	GO:0016787//hydrolase activity;GO:0005215//transporter activity;GO:0003824//catalytic activity	GO:0044238//primary metabolic process;GO:1901360//organic cyclic compound metabolic process;GO:0071704//organic substance metabolic process;GO:0009628//response to abiotic stimulus;GO:0006807//nitrogen compound metabolic process;GO:0006950//response to stress;GO:0006139//nucleobase-containing compound metabolic process;GO:0051234//establishment of localization;GO:0009719//response to endogenous s…
LOC_Os12g22284	162.333	21.6667	9.93	1.51333	-2.71406	5.3261e-11	3.02324e-08	yes	LOC_Os12g22284	white-brown complex homolog protein 11, putative, expressed	-	-	-	-	GO:0071944//cell periphery;GO:0005623//cell;GO:0044464//cell part;GO:0016020//membrane;GO:0005886//plasma membrane	GO:0003824//catalytic activity;GO:0005215//transporter activity;GO:0016787//hydrolase activity	GO:0046483//heterocycle metabolic process;GO:0071704//organic substance metabolic process;GO:0006950//response to stress;GO:0006810//transport;GO:0050896//response to stimulus;GO:0009628//response to abiotic stimulus;GO:0006807//nitrogen compound metabolic process;GO:0008152//metabolic process;GO:0044238//primary metabolic process;GO:1901360//organic cyclic compound metabolic process;GO:0051179//…
LOC_Os12g28950	0.386667	7.76	0.106667	1.87333	4.13443	0.000385481	0.0257147	yes	LOC_Os12g28950	retrotransposon protein, putative, unclassified, expressed	-	-	-	-	-	-	-
LOC_Os12g29950	134.42	41.3933	12.0633	4.10333	-1.55576	5.70322e-08	1.68006e-05	yes	LOC_Os12g29950	nodulin, putative, expressed	-	-	-	-	GO:0005575//cellular_component	GO:0003674//molecular_function	GO:0009607//response to biotic stimulus;GO:0006950//response to stress;GO:0050896//response to stimulus
LOC_Os12g30824	76	6	5.55	0.41	-3.75879	0.000388575	0.0257182	yes	LOC_Os12g30824	terpene synthase, putative, expressed	Metabolism	Metabolism of terpenoids and polyketides	ko00904//Diterpenoid biosynthesis	K14038	GO:0005623//cell;GO:0044464//cell part;GO:0043229//intracellular organelle;GO:0009536//plastid;GO:0005737//cytoplasm;GO:0044424//intracellular part;GO:0043231//intracellular membrane-bounded organelle;GO:0043227//membrane-bounded organelle;GO:0044444//cytoplasmic part;GO:0005622//intracellular;GO:0043226//organelle	GO:0003824//catalytic activity	GO:0007154//cell communication;GO:0044763//single-organism cellular process;GO:0044710//single-organism metabolic process;GO:0044699//single-organism process;GO:0051716//cellular response to stimulus;GO:0050794//regulation of cellular process;GO:0009987//cellular process;GO:0050789//regulation of biological process;GO:0065007//biological regulation;GO:0006629//lipid metabolic process;GO:0023052//…
LOC_Os12g33194	10.3	30.5667	1.01667	3.48333	1.77662	0.000222147	0.0172216	yes	LOC_Os12g33194	expressed protein	-	-	-	-	-	-	GO:0008150//biological_process
LOC_Os12g35670	4.33333	20	0.673333	3.61	2.42261	0.00084575	0.0488348	yes	LOC_Os12g35670	RALFL4 - Rapid ALkalinization Factor RALF family protein precursor, expressed	-	-	-	-	GO:0005576//extracellular region	GO:0004871//signal transducer activity	GO:0044763//single-organism cellular process;GO:0050789//regulation of biological process;GO:0050896//response to stimulus;GO:0050794//regulation of cellular process;GO:0044700//single organism signaling;GO:0044699//single-organism process;GO:0007165//signal transduction;GO:0065007//biological regulation;GO:0009987//cellular process;GO:0007267//cell-cell signaling;GO:0051716//cellular response to…
LOC_Os12g36430	1.33333	26	0.06	1.46	4.60486	4.03459e-08	1.28684e-05	yes	LOC_Os12g36430	expressed protein	-	-	-	-	-	-	-
LOC_Os12g36810	1.33333	7.33333	0.123333	0.776667	2.65473	0.000794211	0.0462576	yes	LOC_Os12g36810	polygalacturonase, putative, expressed	-	-	-	-	GO:0044444//cytoplasmic part;GO:0043229//intracellular organelle;GO:0043227//membrane-bounded organelle;GO:0005623//cell;GO:0044424//intracellular part;GO:0005737//cytoplasm;GO:0005622//intracellular;GO:0043231//intracellular membrane-bounded organelle;GO:0043226//organelle;GO:0030312//external encapsulating structure;GO:0044464//cell part;GO:0005773//vacuole;GO:0005618//cell wall;GO:0071944//cel…	GO:0003824//catalytic activity;GO:0016787//hydrolase activity	GO:0044238//primary metabolic process;GO:0008152//metabolic process;GO:0071704//organic substance metabolic process;GO:0005975//carbohydrate metabolic process
LOC_Os12g36910	61	216	4.77	17.4933	1.87474	2.36846e-05	0.00287963	yes	LOC_Os12g36910	calmodulin binding protein, putative, expressed	-	-	-	-	GO:0005575//cellular_component	GO:0005515//protein binding;GO:0005488//binding	GO:0008150//biological_process
LOC_Os12g38270	1010	279	256.34	78.5	-1.70729	9.57155e-08	2.73975e-05	yes	LOC_Os12g38270	metallothionein, putative, expressed	-	-	-	-	-	GO:0005488//binding	GO:0042592//homeostatic process;GO:0009987//cellular process;GO:0065008//regulation of biological quality;GO:0019725//cellular homeostasis;GO:0044763//single-organism cellular process;GO:0044699//single-organism process;GO:0065007//biological regulation
LOC_Os12g38510	48.6833	8.49	12.4533	2.58	-2.27109	8.06723e-05	0.00776225	yes	LOC_Os12g38510	GRF zinc finger family protein	-	-	-	-	-	-	-
LOC_Os12g38720	113.6	10.9833	24.4133	2.67667	-3.18916	9.41213e-17	1.50101e-13	yes	LOC_Os12g38720	expressed protein	-	-	-	-	-	-	-
LOC_Os12g41660	10.3333	37.3333	1.05667	4.43667	2.06996	9.5793e-07	0.000205648	yes	LOC_Os12g41660	expressed protein	-	-	-	-	GO:0005575//cellular_component	GO:0003674//molecular_function	GO:0008150//biological_process
LOC_Os12g44020	182.667	360.333	17.8933	38.7967	1.11651	4.11181e-06	0.000662041	yes	LOC_Os12g44020	Ser/Thr protein phosphatase family protein, putative, expressed	-	-	-	-	GO:0005829//cytosol;GO:0044464//cell part;GO:0005618//cell wall;GO:0030312//external encapsulating structure;GO:0005623//cell;GO:0071944//cell periphery;GO:0005575//cellular_component;GO:0044444//cytoplasmic part;GO:0005622//intracellular;GO:0044424//intracellular part;GO:0005737//cytoplasm	GO:0003824//catalytic activity;GO:0016787//hydrolase activity	GO:0008150//biological_process;GO:0009987//cellular process;GO:0008152//metabolic process
XLOC_014783	0.666667	10.3333	0.336667	6.24	4.21215	5.27631e-05	0.00553929	yes	TCONS_00018552	-	-	-	-	-	-	-	-
XLOC_053247	42.6667	247	13.1067	75.03	2.51717	0.000381202	0.025482	yes	TCONS_00067363	hypothetical protein OsJ_27029 [Oryza sativa Japonica Group]	-	-	-	-	-	-	-
XLOC_057562	0	7	0.001	3.00667	11.5539	0.000119714	0.0105445	yes	TCONS_00072646	PREDICTED: G-type lectin S-receptor-like serine/threonine-protein kinase SD1-13-like [Oryza brachyantha]	-	-	-	-	GO:0005623//cell;GO:0044464//cell part;GO:0043226//organelle;GO:0043227//membrane-bounded organelle;GO:0044424//intracellular part;GO:0043229//intracellular organelle;GO:0043231//intracellular membrane-bounded organelle;GO:0005622//intracellular	GO:0001883//purine nucleoside binding;GO:0016773//phosphotransferase activity, alcohol group as acceptor;GO:0032549//ribonucleoside binding;GO:1901363//heterocyclic compound binding;GO:0097367//carbohydrate derivative binding;GO:0004672//protein kinase activity;GO:0036094//small molecule binding;GO:0003824//catalytic activity;GO:0032550//purine ribonucleoside binding;GO:0016740//transferase activ…	GO:0044238//primary metabolic process;GO:0043170//macromolecule metabolic process;GO:0044267//cellular protein metabolic process;GO:0019538//protein metabolic process;GO:0008152//metabolic process;GO:0044699//single-organism process;GO:0044260//cellular macromolecule metabolic process;GO:0071704//organic substance metabolic process;GO:0006796//phosphate-containing compound metabolic process;GO:00…
